# Supplementary material for: Comparative analysis of the fecal microbiota from different species of domesticated and wild suids
Source: PubMed Central journal article supplement (PMC6754420; doi:10.1038/s41598-019-49897-1), 2019-09-20
Supplement: 41598_2019_49897_MOESM1_ESM.pdf [file 41598_2019_49897_MOESM1_ESM.pdf]

**Comparative analysis of the fecal microbiota from different species of domesticated and wild suids.**

Florencia Correa-Fiz<sup>1</sup>, Miguel Blanco-Fuertes<sup>1</sup>, Maria Jesus Navas<sup>1</sup>, Anna Lacasta<sup>2</sup>, Richard Bishop<sup>2,3</sup>, Naftaly Githaka<sup>2</sup>, Cynthia Onzere<sup>2,3</sup>, Marie Frédérique Le Potier<sup>4</sup>, Vanessa Almagro-Delgado<sup>5</sup>, Jorge Martinez<sup>1,6</sup>, Virginia Aragon<sup>1</sup>, Fernando Rodriguez<sup>1</sup>.

<sup>1</sup>IRTA, Centre de Recerca en Sanitat Animal (CReSA, IRTA-UAB), Campus de la Universitat Autònoma de Barcelona, 08193 Bellaterra, Spain.

<sup>2</sup>International Livestock Research Institute (ILRI), P.O. Box 30709, 00100 Nairobi, Kenya

<sup>3</sup>Washington State University, Department of Veterinary Microbiology and Pathology, Pullman, WA, USA

<sup>4</sup>ANSES, laboratory of Ploufragan-Plouzané-Niort, swine virology and immunology unit, 22440 Ploufragan, France

<sup>5</sup>Veterinary service Zoo Barcelona, Parc Ciudadella s/n 08003 Barcelona, Spain

<sup>6</sup>Departament de Sanitat i Anatomia Animals, Universitat Autònoma de Barcelona, 08193 Bellaterra, Spain

**Supplementary Table S1.** Number of sequences per sample obtained (input), after filtering (written), and the percentage representing the sequenced used for analysis.

| <b>Sample</b>      | <b>total input seqs</b> | <b>seqs written</b> | <b>After filter %</b> |
|--------------------|-------------------------|---------------------|-----------------------|
| AFRpig10.feces     | 418907                  | 369928              | 88,31                 |
| AFRpig11.feces     | 500309                  | 443674              | 88,68                 |
| AFRpig14.feces     | 435881                  | 386843              | 88,75                 |
| AFRpig15.feces     | 142378                  | 114343              | 80,31                 |
| AFRpig16.feces     | 310460                  | 267392              | 86,13                 |
| AFRpig18.feces     | 493528                  | 399358              | 80,92                 |
| AFRpig20.feces     | 489863                  | 431064              | 88,00                 |
| AFRpig27.feces     | 474893                  | 426578              | 89,83                 |
| AFRpig3.feces      | 406070                  | 347170              | 85,50                 |
| AFRpig4.feces      | 470961                  | 377729              | 80,20                 |
| AFRpig5.feces      | 82270                   | 71023               | 86,33                 |
| AFRpig6.feces      | 538117                  | 473535              | 88,00                 |
| AFRpig7.feces      | 588768                  | 523022              | 88,83                 |
| AFRpig8.feces      | 395475                  | 345918              | 87,47                 |
| AFRpig9.feces      | 419777                  | 361560              | 86,13                 |
| AFRwarthog10.feces | 268721                  | 195885              | 72,90                 |
| AFRwarthog12.feces | 303199                  | 201770              | 66,55                 |
| AFRwarthog14.feces | 292064                  | 220736              | 75,58                 |
| AFRwarthog18.feces | 338626                  | 246500              | 72,79                 |
| AFRwarthog2.feces  | 217943                  | 170973              | 78,45                 |
| AFRwarthog20.feces | 282155                  | 205415              | 72,80                 |
| AFRwarthog21.feces | 417050                  | 329852              | 79,09                 |
| AFRwarthog22.feces | 254574                  | 177244              | 69,62                 |
| AFRwarthog23.feces | 208594                  | 158619              | 76,04                 |
| AFRwarthog24.feces | 172415                  | 128391              | 74,47                 |
| AFRwarthog25.feces | 176178                  | 123559              | 70,13                 |
| AFRwarthog4.feces  | 155081                  | 115185              | 74,27                 |
| AFRwarthog6.feces  | 143699                  | 87849               | 61,13                 |
| AFRwarthog6.feces  | 81471                   | 63927               | 78,47                 |
| AFRwarthog8.feces  | 36033                   | 27348               | 75,90                 |
| COMPig.4feces      | 114703                  | 102935              | 89,74                 |
| COMPig1.feces      | 89944                   | 81661               | 90,79                 |
| COMPig2.feces      | 93801                   | 85298               | 90,94                 |
| COMPig3.feces      | 102263                  | 90913               | 88,90                 |
| COMPig5.feces      | 108482                  | 97029               | 89,44                 |
| COMPig6.feces      | 110390                  | 94215               | 85,35                 |
| COMPig7.feces      | 133835                  | 115523              | 86,32                 |
| COMPig8.feces      | 49620                   | 37087               | 74,74                 |
| COMPig9.feces      | 132296                  | 115423              | 87,25                 |
| SPAwarthog1.feces  | 308901                  | 273712              | 88,61                 |
| SPAwarthog2.feces  | 277310                  | 243208              | 87,70                 |
| SPAwarthog3.feces  | 536462                  | 477227              | 88,96                 |
| SPAwarthog4.feces  | 468062                  | 399964              | 85,45                 |
| SPAwarthog5.feces  | 519725                  | 463231              | 89,13                 |
| SPFpig1.feces      | 82067                   | 75612               | 92,13                 |
| SPFpig10.feces     | 94754                   | 85549               | 90,29                 |
| SPFpig11.feces     | 25334                   | 21134               | 83,42                 |
| SPFpig2.feces      | 140975                  | 128977              | 91,49                 |
| SPFpig3.feces      | 60673                   | 51759               | 85,31                 |

|               |        |        |       |
|---------------|--------|--------|-------|
| SPFpig4.feces | 85008  | 78632  | 92,50 |
| SPFpig5.feces | 141002 | 132778 | 94,17 |
| SPFpig6.feces | 92840  | 85630  | 92,23 |
| SPFpig7.feces | 133499 | 123084 | 92,20 |
| SPFpig8.feces | 120182 | 108862 | 90,58 |
| SPFpig9.feces | 93153  | 83576  | 89,72 |

**Supplementary Table S2.** Alpha diversity and richness estimation through Shannon-Wiener and Chao indices respectively, among groups. Two-sample nonparametric t-test was used with Monte Carlo permutations to calculate the *P* values, using QIIME (vs 1.9)

| Group1      | Group2      | Group1 mean   | Group2 mean   | t stat          | p-value | Index   |
|-------------|-------------|---------------|---------------|-----------------|---------|---------|
| AFR warthog | SPF PIG     | 8.15958638316 | 7.00622552607 | 4.68015786575   | 0.01    | shannon |
| AFR warthog | SPF PIG     | 7877.65596517 | 5669.45986177 | 4.22298680982   | 0.01    | chao    |
| AFR warthog | SPA warthog | 7877.65596517 | 4307.2038146  | 5.92538258374   | 0.01    | chao    |
| AFR pig     | SPA warthog | 7273.3982936  | 4307.2038146  | 4.45959563909   | 0.01    | chao    |
| AFR pig     | SPF PIG     | 7.77129596318 | 7.00622552607 | 3.2365382346    | 0.02    | shannon |
| COM pig     | SPA warthog | 6755.55860122 | 4307.2038146  | 4.04425287565   | 0.03    | chao    |
| AFR pig     | SPF PIG     | 7273.3982936  | 5669.45986177 | 2.92304082869   | 0.1     | chao    |
| COM pig     | SPF PIG     | 7.84256613603 | 7.00622552607 | 2.7892995537    | 0.14    | shannon |
| SPF PIG     | SPA warthog | 7.00622552607 | 8.05978885638 | -2.9956550889   | 0.15    | shannon |
| AFR pig     | AFR warthog | 7.77129596318 | 8.15958638316 | -2.36019736483  | 0.2     | shannon |
| COM pig     | AFR warthog | 6755.55860122 | 7877.65596517 | -2.12441704608  | 0.46    | chao    |
| SPF PIG     | SPA warthog | 5669.45986177 | 4307.2038146  | 2.07312750473   | 0.61    | chao    |
| COM pig     | SPF PIG     | 6755.55860122 | 5669.45986177 | 1.86757799539   | 0.9     | chao    |
| AFR warthog | SPA warthog | 8.15958638316 | 8.05978885638 | 0.477680500336  | 1.0     | shannon |
| COM pig     | AFR pig     | 7.84256613603 | 7.77129596318 | 0.365790188425  | 1.0     | shannon |
| COM pig     | AFR warthog | 7.84256613603 | 8.15958638316 | -1.55339422393  | 1.0     | shannon |
| COM pig     | SPA warthog | 7.84256613603 | 8.05978885638 | -0.922258589567 | 1.0     | shannon |
| AFR pig     | SPA warthog | 7.77129596318 | 8.05978885638 | -1.45874866459  | 1.0     | shannon |
| AFR pig     | AFR warthog | 7273.3982936  | 7877.65596517 | -1.22181967554  | 1.0     | chao    |
| COM pig     | AFR pig     | 6755.55860122 | 7273.3982936  | -0.91988944818  | 1.0     | chao    |

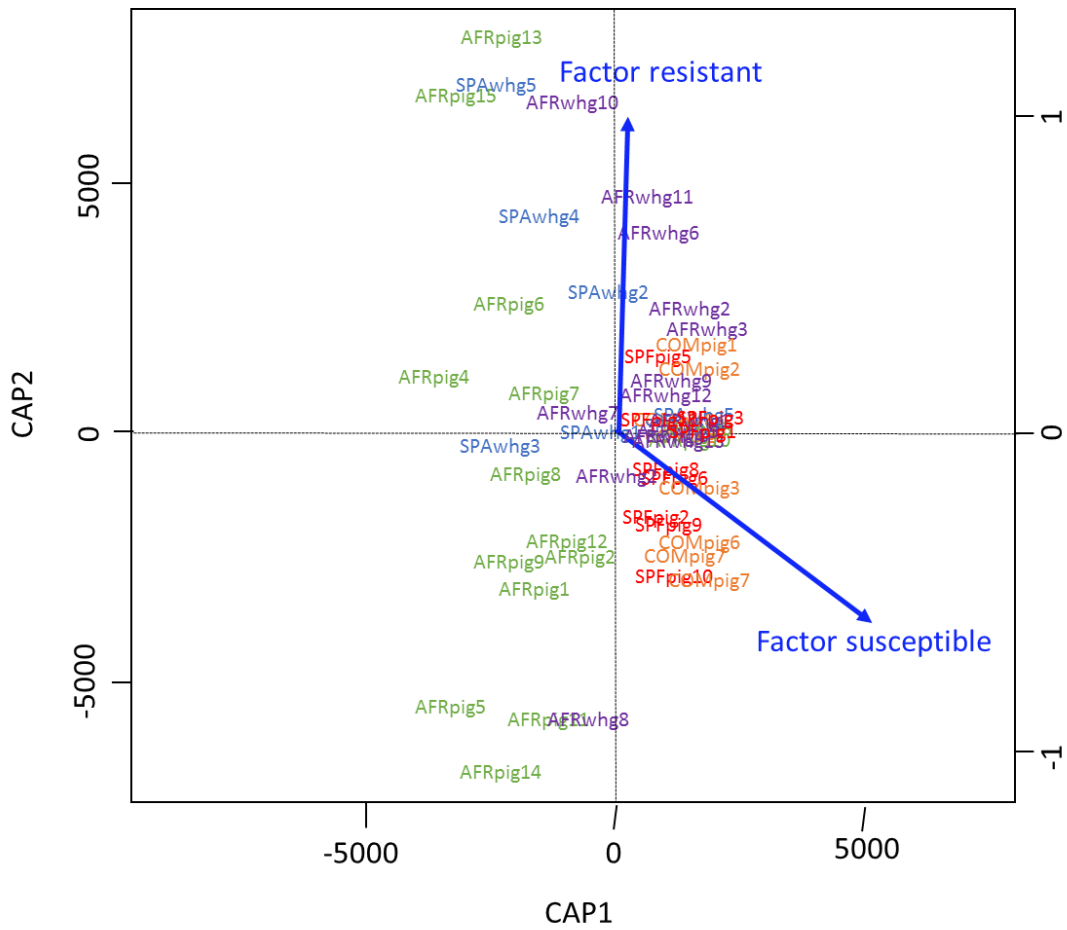

**Supplementary Figure S3.** Distance-based redundancy constrained analysis. The samples were divided in two groups: resistance warthogs (SPA and AFR) or susceptible pigs (SPF, COM and AFR) to explore the clustering.

**Supplementary Table S4.** Core OTUs found in each group analyzed (presence=1, absence=0)

| <i>OTU</i>                 | COM pig<br>CORE | SPF pig<br>CORE | AFR<br>warthog<br>CORE | SPA warthog<br>CORE |
|----------------------------|-----------------|-----------------|------------------------|---------------------|
| <i>Acetanaerobacterium</i> | 1               | 0               | 1                      | 1                   |
| <i>Acetivibrio</i>         | 1               | 1               | 0                      | 1                   |
| <i>Acholeplasma</i>        | 0               | 0               | 0                      | 1                   |
| <i>Acholeplasmataceae</i>  | 0               | 0               | 0                      | 1                   |
| <i>Acholeplasmatales</i>   | 0               | 0               | 0                      | 1                   |
| <i>Acidaminobacter</i>     | 1               | 0               | 0                      | 1                   |
| <i>Acidaminococcaceae</i>  | 1               | 1               | 1                      | 1                   |
| <i>Acinetobacter</i>       | 0               | 0               | 0                      | 1                   |
| <i>Actinobacillus</i>      | 0               | 0               | 0                      | 1                   |
| <i>Actinobacteria</i>      | 1               | 1               | 1                      | 1                   |
| <i>Actinomycetales</i>     | 0               | 0               | 0                      | 1                   |
| <i>Aeromonadales</i>       | 1               | 0               | 1                      | 1                   |
| <i>Alcaligenaceae</i>      | 0               | 0               | 0                      | 1                   |
| <i>Alistipes</i>           | 1               | 1               | 0                      | 1                   |
| <i>Alloprevotella</i>      | 1               | 0               | 1                      | 1                   |
| <i>Alphaproteobacteria</i> | 0               | 0               | 0                      | 1                   |
| <i>Anaerofustis</i>        | 0               | 0               | 1                      | 0                   |
| <i>Anaerolineaceae</i>     | 0               | 0               | 1                      | 0                   |
| <i>Anaerolineae</i>        | 0               | 0               | 1                      | 0                   |
| <i>Anaerolineales</i>      | 0               | 0               | 1                      | 0                   |
| <i>Anaerophaga</i>         | 0               | 0               | 0                      | 1                   |
| <i>Anaeroplasma</i>        | 0               | 0               | 1                      | 1                   |
| <i>Anaeroplasmataceae</i>  | 1               | 0               | 1                      | 1                   |
| <i>Anaeroplasmatales</i>   | 1               | 0               | 1                      | 1                   |
| <i>Anaerosporobacter</i>   | 0               | 1               | 0                      | 1                   |
| <i>Anaerostipes</i>        | 0               | 0               | 0                      | 1                   |
| <i>Anaerotruncus</i>       | 1               | 0               | 0                      | 0                   |
| <i>Anaerovibrio</i>        | 1               | 0               | 1                      | 1                   |
| <i>Anaerovorax</i>         | 1               | 0               | 1                      | 1                   |
| <i>Asteroleplasma</i>      | 1               | 0               | 0                      | 0                   |

|                                          |   |   |   |   |
|------------------------------------------|---|---|---|---|
| <i>Bacillaceae 1</i>                     | 0 | 0 | 0 | 1 |
| <i>Bacillales</i>                        | 0 | 0 | 0 | 1 |
| <i>Bacilli</i>                           | 1 | 0 | 1 | 1 |
| <i>Bacillus</i>                          | 0 | 0 | 0 | 1 |
| <i>Bacteroidaceae</i>                    | 0 | 1 | 1 | 1 |
| <i>Bacteroidales</i>                     | 1 | 1 | 1 | 1 |
| <i>Bacteroides</i>                       | 0 | 1 | 1 | 1 |
| <i>Bacteroidetes</i>                     | 1 | 1 | 1 | 1 |
| <i>Bacteroidia</i>                       | 1 | 1 | 1 | 1 |
| <i>Barnesiella</i>                       | 1 | 1 | 1 | 1 |
| <i>Bdellovibrionaceae</i>                | 1 | 1 | 0 | 1 |
| <i>Bdellovibrionales</i>                 | 1 | 1 | 0 | 1 |
| <i>Betaproteobacteria</i>                | 1 | 1 | 1 | 1 |
| <i>Bifidobacteriaceae</i>                | 0 | 0 | 0 | 1 |
| <i>Bifidobacteriales</i>                 | 0 | 0 | 0 | 1 |
| <i>Bifidobacterium</i>                   | 0 | 0 | 0 | 1 |
| <i>Bilophila</i>                         | 0 | 1 | 1 | 1 |
| <i>Blautia</i>                           | 1 | 1 | 1 | 1 |
| <i>Bulleidia</i>                         | 1 | 0 | 1 | 1 |
| <i>Burkholderiales</i>                   | 1 | 1 | 1 | 1 |
| <i>Butyricoccus</i>                      | 0 | 1 | 0 | 1 |
| <i>Butyricimonas</i>                     | 0 | 1 | 0 | 0 |
| <i>Candidatus Saccharibacteria</i>       | 0 | 0 | 0 | 1 |
| <i>Catonella</i>                         | 0 | 0 | 1 | 0 |
| <i>Cellulosibacter</i>                   | 1 | 0 | 0 | 0 |
| <i>Cellulosilyticum</i>                  | 0 | 0 | 1 | 1 |
| <i>Chitinophagaceae</i>                  | 0 | 0 | 1 | 0 |
| <i>Chloroflexi</i>                       | 0 | 0 | 1 | 0 |
| <i>Clostridia</i>                        | 1 | 1 | 1 | 1 |
| <i>Clostridiaceae 1</i>                  | 1 | 1 | 1 | 1 |
| <i>Clostridiales</i>                     | 1 | 1 | 1 | 1 |
| <i>Clostridiales_Incertae Sedis XII</i>  | 1 | 0 | 0 | 1 |
| <i>Clostridiales_Incertae Sedis XIII</i> | 1 | 1 | 1 | 1 |
| <i>Clostridium III</i>                   | 1 | 0 | 0 | 0 |

|                                           |   |   |   |   |
|-------------------------------------------|---|---|---|---|
| <i>Clostridium IV</i>                     | 1 | 1 | 1 | 1 |
| <i>Clostridium sensu stricto</i>          | 1 | 0 | 1 | 1 |
| <i>Clostridium XI</i>                     | 1 | 1 | 1 | 1 |
| <i>Clostridium XIVa</i>                   | 1 | 1 | 1 | 1 |
| <i>Clostridium XIVb</i>                   | 1 | 1 | 0 | 1 |
| <i>Clostridium XVIII</i>                  | 0 | 1 | 1 | 1 |
| <i>Collinsella</i>                        | 0 | 0 | 0 | 1 |
| <i>Coprobacillus</i>                      | 0 | 1 | 0 | 1 |
| <i>Coprococcus</i>                        | 1 | 1 | 1 | 1 |
| <i>Coralimargarita</i>                    | 0 | 0 | 0 | 1 |
| <i>Coriobacteriaceae</i>                  | 1 | 1 | 1 | 1 |
| <i>Coriobacteriales</i>                   | 1 | 1 | 1 | 1 |
| <i>Corynebacteriaceae</i>                 | 0 | 0 | 0 | 1 |
| <i>Corynebacterium</i>                    | 0 | 0 | 0 | 1 |
| <i>Defluviitalea</i>                      | 0 | 1 | 1 | 1 |
| <i>Defluviitaleaceae</i>                  | 0 | 1 | 1 | 1 |
| <i>Deltaproteobacteria</i>                | 1 | 1 | 1 | 1 |
| <i>Desulfovibrio</i>                      | 1 | 1 | 0 | 1 |
| <i>Desulfovibrionaceae</i>                | 1 | 1 | 1 | 1 |
| <i>Desulfovibrionales</i>                 | 1 | 1 | 1 | 1 |
| <i>Dialister</i>                          | 0 | 1 | 0 | 0 |
| <i>Dorea</i>                              | 1 | 1 | 1 | 1 |
| <i>Eggerthella</i>                        | 0 | 0 | 0 | 1 |
| <i>Elusimicrobia</i>                      | 0 | 0 | 0 | 1 |
| <i>Elusimicrobiaceae</i>                  | 0 | 0 | 0 | 1 |
| <i>Elusimicrobiales</i>                   | 0 | 0 | 0 | 1 |
| <i>Elusimicrobium</i>                     | 0 | 0 | 0 | 1 |
| <i>Enterobacteriaceae</i>                 | 0 | 1 | 0 | 1 |
| <i>Enterobacteriales</i>                  | 0 | 1 | 0 | 1 |
| <i>Enterococcaceae</i>                    | 0 | 0 | 0 | 1 |
| <i>Enterococcus</i>                       | 0 | 0 | 0 | 1 |
| <i>Erysipelothrix</i>                     | 0 | 0 | 1 | 1 |
| <i>Erysipelotrichaceae</i>                | 1 | 1 | 1 | 1 |
| <i>Erysipelotrichaceae_incertae_sedis</i> | 0 | 1 | 0 | 1 |



|                                      |   |   |   |   |
|--------------------------------------|---|---|---|---|
| <i>Erysipelotrichales</i>            | 1 | 1 | 1 | 1 |
| <i>Erysipelotrichia</i>              | 1 | 1 | 1 | 1 |
| <i>Escherichia/Shigella</i>          | 0 | 1 | 0 | 1 |
| <i>Ethanoligenens</i>                | 1 | 0 | 0 | 1 |
| <i>Eubacteriaceae</i>                | 1 | 1 | 1 | 1 |
| <i>Eubacterium</i>                   | 1 | 1 | 1 | 1 |
| <i>Euryarchaeota</i>                 | 1 | 0 | 0 | 1 |
| <i>Faecalibacterium</i>              | 1 | 1 | 1 | 1 |
| <i>Fibrobacter</i>                   | 1 | 0 | 1 | 1 |
| <i>Fibrobacteraceae</i>              | 1 | 0 | 1 | 1 |
| <i>Fibrobacterales</i>               | 1 | 0 | 1 | 1 |
| <i>Fibrobacteres</i>                 | 1 | 0 | 1 | 1 |
| <i>Fibrobacteria</i>                 | 1 | 0 | 1 | 1 |
| <i>Firmicutes</i>                    | 1 | 1 | 1 | 1 |
| <i>Flavobacteriaceae</i>             | 1 | 0 | 1 | 1 |
| <i>Flavobacteriales</i>              | 1 | 0 | 1 | 1 |
| <i>Flavobacteriia</i>                | 1 | 0 | 1 | 1 |
| <i>Flavonifractor</i>                | 1 | 1 | 0 | 1 |
| <i>Fusibacter</i>                    | 0 | 0 | 0 | 1 |
| <i>Gammaproteobacteria</i>           | 1 | 1 | 1 | 1 |
| <i>Gemmiger</i>                      | 1 | 0 | 0 | 1 |
| <i>Gordonibacter</i>                 | 0 | 1 | 0 | 1 |
| <i>Gracilibacteraceae</i>            | 1 | 0 | 0 | 1 |
| <i>Hallella</i>                      | 1 | 0 | 0 | 1 |
| <i>Holdemania</i>                    | 1 | 0 | 1 | 1 |
| <i>Hydrogenoanaerobacterium</i>      | 1 | 0 | 0 | 1 |
| <i>Insolitispirillum</i>             | 0 | 0 | 0 | 1 |
| <i>Lachmoanaerobaculum</i>           | 0 | 0 | 0 | 1 |
| <i>Lachnospiracea_incertae_sedis</i> | 1 | 1 | 1 | 1 |
| <i>Lachnospiraceae</i>               | 1 | 1 | 1 | 1 |
| <i>Lactobacillaceae</i>              | 1 | 0 | 0 | 1 |
| <i>Lactobacillales</i>               | 1 | 0 | 1 | 1 |
| <i>Lactobacillus</i>                 | 1 | 0 | 0 | 1 |
| <i>Lentisphaerae</i>                 | 0 | 0 | 0 | 1 |

|                           |   |   |   |   |
|---------------------------|---|---|---|---|
| <i>Lentisphaeria</i>      | 0 | 0 | 0 | 1 |
| <i>Lutispora</i>          | 1 | 0 | 0 | 1 |
| <i>Lysinibacillus</i>     | 0 | 0 | 0 | 1 |
| <i>Marinilabiaceae</i>    | 0 | 0 | 1 | 1 |
| <i>Megamonas</i>          | 0 | 0 | 0 | 1 |
| <i>Methanobacteria</i>    | 1 | 0 | 0 | 0 |
| <i>Methanobacteriales</i> | 1 | 0 | 0 | 0 |
| <i>Methanobrevibacter</i> | 1 | 0 | 0 | 0 |
| <i>Microbacteriaceae</i>  | 0 | 0 | 0 | 1 |
| <i>Mogibacterium</i>      | 0 | 0 | 0 | 1 |
| <i>Mollicutes</i>         | 1 | 0 | 1 | 1 |
| <i>Moraxella</i>          | 0 | 0 | 1 | 1 |
| <i>Moraxellaceae</i>      | 0 | 0 | 1 | 1 |
| <i>Mycoplasma</i>         | 0 | 0 | 0 | 1 |
| <i>Mycoplasmataceae</i>   | 0 | 0 | 0 | 1 |
| <i>Mycoplasmatales</i>    | 0 | 0 | 0 | 1 |
| <i>Negativicutes</i>      | 1 | 1 | 1 | 1 |
| <i>Opitutae</i>           | 0 | 0 | 0 | 1 |
| <i>Oribacterium</i>       | 1 | 0 | 1 | 1 |
| <i>Ornithobacterium</i>   | 0 | 0 | 0 | 1 |
| <i>Oscillibacter</i>      | 1 | 1 | 1 | 1 |
| <i>Oxalobacter</i>        | 0 | 0 | 1 | 0 |
| <i>Oxalobacteraceae</i>   | 0 | 0 | 1 | 0 |
| <i>Paludibacter</i>       | 0 | 0 | 1 | 1 |
| <i>Papillibacter</i>      | 1 | 0 | 0 | 1 |
| <i>Parabacteroides</i>    | 1 | 1 | 0 | 1 |
| <i>Paraprevotella</i>     | 1 | 1 | 1 | 1 |
| <i>Parasutterella</i>     | 0 | 1 | 0 | 0 |
| <i>Pasteurellaceae</i>    | 0 | 0 | 0 | 1 |
| <i>Pasteurellales</i>     | 0 | 0 | 0 | 1 |
| <i>Pelistega</i>          | 0 | 0 | 0 | 1 |
| <i>Pelospora</i>          | 0 | 0 | 0 | 1 |
| <i>Peptococcaceae 1</i>   | 0 | 0 | 0 | 1 |
| <i>Peptococcus</i>        | 0 | 0 | 0 | 1 |

|                                               |   |   |   |   |
|-----------------------------------------------|---|---|---|---|
| <i>Peptostreptococcaceae</i>                  | 1 | 1 | 1 | 1 |
| <i>Petrimonas</i>                             | 0 | 0 | 1 | 1 |
| <i>Phascolarctobacterium</i>                  | 1 | 1 | 1 | 1 |
| <i>Planctomycetaceae</i>                      | 1 | 0 | 1 | 1 |
| <i>Planctomycetales</i>                       | 1 | 0 | 1 | 1 |
| <i>Planctomycetes</i>                         | 1 | 0 | 1 | 1 |
| <i>Planctomycetia</i>                         | 1 | 0 | 1 | 1 |
| <i>Planococcaceae</i>                         | 0 | 0 | 0 | 1 |
| <i>Planococcaceae_incertae_sedis</i>          | 0 | 0 | 0 | 1 |
| <i>Porphyromonadaceae</i>                     | 1 | 1 | 1 | 1 |
| <i>Prevotella</i>                             | 1 | 1 | 1 | 1 |
| <i>Prevotellaceae</i>                         | 1 | 1 | 1 | 1 |
| <i>Propionibacteriaceae</i>                   | 0 | 0 | 0 | 1 |
| <i>Propionibacterium</i>                      | 0 | 0 | 0 | 1 |
| <i>Proteobacteria</i>                         | 1 | 1 | 1 | 1 |
| <i>Pseudobutyrvibrio</i>                      | 1 | 1 | 1 | 1 |
| <i>Pseudoflavonifractor</i>                   | 1 | 0 | 1 | 1 |
| <i>Pseudomonadaceae</i>                       | 0 | 0 | 0 | 1 |
| <i>Pseudomonadales</i>                        | 0 | 0 | 1 | 1 |
| <i>Pseudomonas</i>                            | 0 | 0 | 0 | 1 |
| <i>Psychrobacter</i>                          | 0 | 0 | 0 | 1 |
| <i>Puniceicoccaceae</i>                       | 0 | 0 | 0 | 1 |
| <i>Puniceicoccales</i>                        | 0 | 0 | 0 | 1 |
| <i>Pyramidobacter</i>                         | 1 | 0 | 1 | 1 |
| <i>Rhodospirillaceae</i>                      | 0 | 0 | 0 | 1 |
| <i>Rhodospirillales</i>                       | 0 | 0 | 0 | 1 |
| <i>Rikenellaceae</i>                          | 1 | 1 | 0 | 1 |
| <i>Roseburia</i>                              | 1 | 1 | 1 | 1 |
| <i>Ruminobacter</i>                           | 0 | 0 | 0 | 1 |
| <i>Ruminococcaceae</i>                        | 1 | 1 | 1 | 1 |
| <i>Ruminococcus</i>                           | 1 | 1 | 1 | 1 |
| <i>Ruminococcus2</i>                          | 0 | 1 | 1 | 1 |
| <i>Saccharibacteria_genera_incertae_sedis</i> | 0 | 0 | 0 | 1 |
| <i>Saccharofermentans</i>                     | 0 | 0 | 1 | 0 |

|                                             |   |   |   |   |
|---------------------------------------------|---|---|---|---|
| <i>Schwartzia</i>                           | 0 | 0 | 1 | 0 |
| <i>Selenomonadales</i>                      | 1 | 1 | 1 | 1 |
| <i>Sharpea</i>                              | 0 | 0 | 0 | 1 |
| <i>Solibacillus</i>                         | 0 | 0 | 0 | 1 |
| <i>Sphaerochaeta</i>                        | 1 | 0 | 1 | 1 |
| <i>Sphingobacteriaceae</i>                  | 1 | 0 | 1 | 0 |
| <i>Sphingobacteriales</i>                   | 1 | 0 | 1 | 0 |
| <i>Sphingobacteriia</i>                     | 1 | 0 | 1 | 0 |
| <i>Spirochaetaceae</i>                      | 1 | 0 | 1 | 1 |
| <i>Spirochaetales</i>                       | 1 | 0 | 1 | 1 |
| <i>Spirochaetes</i>                         | 1 | 0 | 1 | 1 |
| <i>Spirochaetia</i>                         | 1 | 0 | 1 | 1 |
| <i>Sporobacter</i>                          | 1 | 1 | 1 | 1 |
| <i>Staphylococcaceae</i>                    | 0 | 0 | 0 | 1 |
| <i>Staphylococcus</i>                       | 0 | 0 | 0 | 1 |
| <i>Streptococcaceae</i>                     | 0 | 0 | 1 | 1 |
| <i>Streptococcus</i>                        | 0 | 0 | 1 | 1 |
| <i>Subdivision5</i>                         | 1 | 0 | 1 | 1 |
| <i>Subdivision5_genera_incertae_sedis</i>   | 1 | 0 | 1 | 1 |
| <i>Succinivibrio</i>                        | 1 | 0 | 1 | 1 |
| <i>Succinivibrionaceae</i>                  | 1 | 0 | 1 | 1 |
| <i>Sutterella</i>                           | 1 | 1 | 0 | 1 |
| <i>Sutterellaceae</i>                       | 1 | 1 | 0 | 1 |
| <i>Synergistaceae</i>                       | 1 | 0 | 1 | 1 |
| <i>Synergistales</i>                        | 1 | 0 | 1 | 1 |
| <i>Synergistetes</i>                        | 1 | 0 | 1 | 1 |
| <i>Synergistia</i>                          | 1 | 0 | 1 | 1 |
| <i>Syntrophomonadaceae</i>                  | 0 | 0 | 0 | 1 |
| <i>Tenericutes</i>                          | 1 | 0 | 1 | 1 |
| <i>Thermogymnomonas</i>                     | 1 | 0 | 0 | 1 |
| <i>Thermoplasmata</i>                       | 1 | 0 | 0 | 1 |
| <i>Thermoplasmatales</i>                    | 0 | 0 | 0 | 1 |
| <i>Thermoplasmatales_incertae_sedis</i>     | 1 | 0 | 0 | 1 |
| <i>ThermoplasmatalesMethanobacteriaceae</i> | 1 | 0 | 0 | 0 |

|                        |   |   |   |   |
|------------------------|---|---|---|---|
| <i>Treponema</i>       | 1 | 0 | 1 | 1 |
| <i>Turicibacter</i>    | 1 | 1 | 0 | 1 |
| <i>Ureaplasma</i>      | 0 | 0 | 0 | 1 |
| <i>Vampirovibrio</i>   | 1 | 1 | 0 | 1 |
| <i>Veillonella</i>     | 0 | 0 | 0 | 1 |
| <i>Veillonellaceae</i> | 1 | 1 | 1 | 1 |
| <i>Verrucomicrobia</i> | 1 | 0 | 1 | 1 |
| <i>Victivallaceae</i>  | 0 | 0 | 0 | 1 |
| <i>Victivallales</i>   | 0 | 0 | 0 | 1 |
| <i>Victivallis</i>     | 0 | 0 | 0 | 1 |

**Supplementary Table S5.** Mean relative abundances of the OTUs found present in any of the five core group analysis

| Domain   | Phyla          | Order               | Class              | Family              | Genus               | Mean SPF pig | Mean COM pig | Mean AFR pig | Mean AFR warthog g | Mean SPA warthog |
|----------|----------------|---------------------|--------------------|---------------------|---------------------|--------------|--------------|--------------|--------------------|------------------|
| Bacteria | Tenericutes    | Mollicutes          | Anaeroplasmatales  | Anaeroplasmataceae  | Anaeroplasma        | 0,002409865  | 0,000946029  | 0,000886768  | 0,00193538         | 0,011913663      |
| Bacteria | Firmicutes     | Clostridia          | Clostridiales      | Lachnospiraceae     | Cellulosilyticum    | 0,000155712  | 0,000388243  | 0,001875377  | 0,001997969        | 0,003928124      |
| Bacteria | Firmicutes     | Erysipelotrichia    | Erysipelotrichales | Erysipelotrichaceae | Erysipelothrix      | 0            | 6,41854E-05  | 0,000939883  | 0,001107819        | 0,000130191      |
| Bacteria | Proteobacteria | Gammaproteobacteria | Pseudomonadales    | Moraxellaceae       | Moraxella           | 7,04847E-07  | 0            | 1,13486E-05  | 0,0029372          | 6,06265E-05      |
| Bacteria | Bacteroidetes  | Bacteroidia         | Bacteroidales      | Porphyromonadaceae  | Paludibacter        | 0            | 0,003622412  | 0,006583504  | 0,002872304        | 0,015553847      |
| Bacteria | Bacteroidetes  | Bacteroidia         | Bacteroidales      | Porphyromonadaceae  | Petrimonas          | 0            | 0            | 2,47612E-05  | 0,000903059        | 0,003815899      |
| Bacteria | Firmicutes     | Bacilli             | Lactobacillales    | Streptococcaceae    | Streptococcus       | 0,000835519  | 0,003901821  | 0,000569569  | 0,000339425        | 0,000919502      |
| Bacteria | Bacteroidetes  | Bacteroidia         | Bacteroidales      | Marinilabiaceae     |                     | 0            | 0,006976556  | 0,003899366  | 0,016124349        | 0,000817929      |
| Bacteria | Firmicutes     | Bacilli             | Lactobacillales    | Streptococcaceae    |                     | 0,000837265  | 0,00390489   | 0,000580204  | 0,000343252        | 0,000921974      |
| Bacteria | Proteobacteria | Gammaproteobacteria | Pseudomonadales    | Moraxellaceae       |                     | 2,31218E-05  | 1,10643E-05  | 0,000212703  | 0,005778435        | 0,000196472      |
| Bacteria | Proteobacteria | Gammaproteobacteria | Pseudomonadales    |                     |                     | 2,70035E-05  | 1,59926E-05  | 0,000218613  | 0,005801325        | 0,000225991      |
| Bacteria | Firmicutes     | Bacilli             | Lactobacillales    | Aerococcaceae       | Abiotrophia         | 7,04847E-07  | 2,50577E-06  | 1,76493E-07  | 0                  | 0                |
| Bacteria | Actinobacteria | Actinobacteria      | Actinomycetales    | Micrococcaceae      | Acaricomes          | 0            | 0            | 1,92724E-07  | 0                  | 0                |
| Bacteria | Firmicutes     | Clostridia          | Clostridiales      | Ruminococcaceae     | Acetanaerobacterium | 0,026762041  | 0,009675083  | 0,00112781   | 0,001207151        | 0,004178715      |
| Bacteria | Firmicutes     | Clostridia          | Clostridiales      | Lachnospiraceae     | Acetitomaculum      | 4,81229E-05  | 1,16373E-05  | 2,99601E-05  | 1,59417E-05        | 4,87696E-06      |
| Bacteria | Firmicutes     | Clostridia          | Clostridiales      | Ruminococcaceae     | Acetivibrio         | 0,000990158  | 0,001873197  | 0,001677363  | 0,000594794        | 0,000769379      |

|          |                |                     |                   |                                   |                   |             |             |             |             |             |
|----------|----------------|---------------------|-------------------|-----------------------------------|-------------------|-------------|-------------|-------------|-------------|-------------|
| Bacteria | Firmicutes     | Clostridia          | Clostridiales     | Peptostreptococcaceae             | Acetoanaerobium   | 0           | 0           | 1,14011E-06 | 4,08149E-06 | 0           |
| Bacteria | Proteobacteria | Alphaproteobacteria | Rhodospirillales  | Acetobacteraceae                  | Acetobacter       | 0           | 0           | 9,27936E-07 | 0           | 0           |
| Bacteria | Firmicutes     | Clostridia          | Clostridiales     | Eubacteriaceae                    | Acetobacterium    | 0           | 0           | 0           | 4,70618E-07 | 0           |
| Bacteria | Tenericutes    | Mollicutes          | Acholeplasmatales | Acholeplasmataceae                | Acholeplasma      | 0,000522859 | 6,47658E-06 | 6,06724E-05 | 0,000126821 | 0,00804251  |
| Bacteria | Proteobacteria | Betaproteobacteria  | Burkholderiales   | Alcaligenaceae                    | Achromobacter     | 0           | 0           | 1,5026E-07  | 0           | 0           |
| Bacteria | Firmicutes     | Clostridia          | Clostridiales     | Clostridiales_Incertae_Sedis_XII  | Acidaminobacter   | 0,00012998  | 0,000297145 | 0,001394139 | 6,88033E-05 | 4,5567E-05  |
| Bacteria | Firmicutes     | Negativicutes       | Selenomonadales   | Acidaminococcaceae                | Acidaminococcus   | 5,36781E-05 | 0,000103218 | 0,001142335 | 0,001169236 | 4,3175E-07  |
| Bacteria | Actinobacteria | Actinobacteria      | Acidimicrobiales  | Acidimicrobinae"_incomplete_sedis | Aciditerrimonas   | 0           | 0           | 6,02309E-07 | 0           | 0           |
| Bacteria | Proteobacteria | Alphaproteobacteria | Rhodospirillales  | Acetobacteraceae                  | Acidocella        | 0           | 0           | 1,40916E-06 | 0           | 1,79097E-05 |
| Bacteria | Actinobacteria | Actinobacteria      | Actinomycetales   | Acidothermaceae                   | Acidothermus      | 0           | 0           | 1,76493E-07 | 0           | 0           |
| Bacteria | Proteobacteria | Betaproteobacteria  | Burkholderiales   | Comamonadaceae                    | Acidovorax        | 1,99122E-06 | 0           | 1,09264E-06 | 4,17777E-07 | 1,46139E-06 |
| Bacteria | Proteobacteria | Gammaproteobacteria | Pseudomonadales   | Moraxellaceae                     | Acinetobacter     | 9,54688E-06 | 6,43171E-06 | 0,000175784 | 0,002775397 | 7,27491E-05 |
| Bacteria | Proteobacteria | Gammaproteobacteria | Pasteurellales    | Pasteurellaceae                   | Actinobacillus    | 6,18811E-05 | 3,00305E-06 | 6,14581E-05 | 2,39314E-05 | 0,000990666 |
| Bacteria | Actinobacteria | Actinobacteria      | Actinomycetales   | Actinomycetaceae                  | Actinobaculum     | 0           | 1,14513E-06 | 0           | 0           | 0           |
| Bacteria | Actinobacteria | Actinobacteria      | Actinomycetales   | Actinomycetaceae                  | Actinomyces       | 4,05959E-06 | 2,18398E-06 | 2,46445E-06 | 6,88238E-07 | 3,83677E-06 |
| Bacteria | Actinobacteria | Actinobacteria      | Actinomycetales   | Pseudonocardiaceae                | Actinomycetospora | 0           | 0           | 5,78172E-07 | 0           | 0           |
| Bacteria | Actinobacteria | Actinobacteria      | Actinomycetales   | Micromonosporaceae                | Actinoplanes      | 0           | 0           | 3,6088E-07  | 0           | 0           |
| Bacteria | Bacteroidetes  | Cytophagia          | Cytophagales      | Cytophagaceae                     | Adhaeribacter     | 1,15613E-06 | 0           | 8,82467E-07 | 0           | 0           |
| Bacteria | Actinobacteria | Actinobacteria      | Coriobacteriales  | Coriobacteriaceae                 | Adlercreutzia     | 4,00055E-05 | 0           | 1,17475E-05 | 0,000134094 | 0           |
| Bacteria | Proteobacteria | Betaproteobacteria  | Burkholderiales   | Alcaligenaceae                    | Advenella         | 0           | 0           | 3,5255E-07  | 3,29433E-06 | 1,50014E-06 |

|          |                 |                     |                    |                     |                 |             |             |             |             |             |
|----------|-----------------|---------------------|--------------------|---------------------|-----------------|-------------|-------------|-------------|-------------|-------------|
| Bacteria | Firmicutes      | Bacilli             | Bacillales         | Bacillaceae I       | Aeribacillus    | 0           | 0           | 3,52987E-07 | 0           | 0           |
| Bacteria | Firmicutes      | Bacilli             | Lactobacillales    | Aerococcaceae       | Aerococcus      | 1,08774E-06 | 0           | 5,53125E-05 | 3,22492E-05 | 1,36432E-05 |
| Bacteria | Actinobacteria  | Actinobacteria      | Actinomycetales    | Nocardioideaceae    | Aeromicrobium   | 0           | 0           | 1,80215E-07 | 0           | 0           |
| Bacteria | Proteobacteria  | Gammaproteobacteria | Aeromonadales      | Aeromonadaceae      | Aeromonas       | 7,38594E-07 | 0           | 1,80215E-07 | 4,18272E-06 | 0           |
| Bacteria | Proteobacteria  | Gammaproteobacteria | Pasteurellales     | Pasteurellaceae     | Aggregatibacter | 0           | 0           | 3,43604E-06 | 0           | 8,22341E-07 |
| Bacteria | Actinobacteria  | Actinobacteria      | Actinomycetales    | Microbacteriaceae   | Agrococcus      | 0           | 0           | 1,84386E-07 | 0           | 0           |
| Bacteria | Actinobacteria  | Actinobacteria      | Actinomycetales    | Microbacteriaceae   | Agromyces       | 0           | 0           | 1,54656E-07 | 0           | 0           |
| Bacteria | Verrucomicrobia | Verrucomicrobiae    | Verrucomicrobiales | Verrucomicrobiaceae | Akkermansia     | 0,001670242 | 0,002448003 | 0,01036513  | 6,95456E-07 | 9,9488E-06  |
| Bacteria | Proteobacteria  | Gammaproteobacteria | Alteromonadales    | Alteromonadaceae    | Alishewanella   | 0           | 0           | 1,80215E-07 | 6,2012E-07  | 0           |
| Bacteria | Bacteroidetes   | Bacteroidia         | Bacteroidales      | Rikenellaceae       | Alistipes       | 0,027403396 | 0,000500772 | 0,000163167 | 6,29729E-06 | 0,000880643 |
| Bacteria | Firmicutes      | Clostridia          | Clostridiales      | Eubacteriaceae      | Alkalibacter    | 0           | 1,17934E-06 | 5,53159E-07 | 0           | 4,3175E-07  |
| Bacteria | Firmicutes      | Bacilli             | Lactobacillales    | Carnobacteriaceae   | Alkalibacterium | 0           | 0           | 1,51678E-06 | 0           | 1,46139E-06 |
| Bacteria | Firmicutes      | Clostridia          | Clostridiales      | Eubacteriaceae      | Alkalibaculum   | 0           | 0           | 1,80215E-07 | 0           | 0           |
| Bacteria | Bacteroidetes   | Bacteroidia         | Bacteroidales      | Marinilabiaceae     | Alkaliflexus    | 0           | 0           | 3,56721E-07 | 3,47728E-07 | 0           |
| Bacteria | Bacteroidetes   | Bacteroidia         | Bacteroidales      | Marinilabiliaceae   | Alkalitalea     | 0           | 0           | 1,16074E-06 | 2,16547E-07 | 8,50838E-07 |
| Bacteria | Proteobacteria  | Gammaproteobacteria | Pseudomonadales    | Moraxellaceae       | Alkanindiges    | 8,35086E-07 | 0           | 1,58428E-06 | 1,51583E-06 | 0           |
| Bacteria | Firmicutes      | Negativicutes       | Selenomonadales    | Veillonellaceae     | Allisonella     | 0           | 6,43443E-05 | 6,73241E-05 | 5,48676E-05 | 4,3175E-07  |
| Bacteria | Firmicutes      | Erysipelotrichia    | Erysipelotrichales | Erysipelotrichaceae | Allobaculum     | 1,15613E-06 | 0           | 8,84862E-07 | 1,80156E-06 | 0           |
| Bacteria | Firmicutes      | Bacilli             | Lactobacillales    | Carnobacteriaceae   | Alloiococcus    | 1,06165E-06 | 9,62643E-07 | 9,38663E-07 | 0           | 5,67671E-06 |
| Bacteria | Bacteroidetes   | Bacteroidia         | Bacteroidales      | Prevotellaceae      | Alloprevotella  | 1,42144E-05 | 0,067259447 | 0,014888745 | 0,00820818  | 0,004091312 |



|          |                |                     |                  |                                   |                    |             |             |             |             |             |
|----------|----------------|---------------------|------------------|-----------------------------------|--------------------|-------------|-------------|-------------|-------------|-------------|
| Bacteria | Proteobacteria | Alphaproteobacteria | Sphingomonadales | Erythrobacteraceae                | Altererythrobacter | 1,15613E-06 | 0           | 6,70979E-07 | 0           | 0           |
| Bacteria | Proteobacteria | Betaproteobacteria  | Neisseriales     | Neisseriaceae                     | Alysiella          | 0           | 0           | 4,89058E-07 | 0           | 1,43184E-06 |
| Bacteria | Proteobacteria | Alphaproteobacteria | Rhodobacterales  | Rhodobacteraceae                  | Amaricoccus        | 0           | 0           | 8,47489E-07 | 0           | 0           |
| Bacteria | Firmicutes     | Bacilli             | Bacillales       | Bacillaceae 2                     | Amphibacillus      | 0           | 0           | 0           | 0           | 8,635E-07   |
| Bacteria | Firmicutes     | Negativicutes       | Selenomonadales  | Veillonellaceae                   | Anaeroarcus        | 0           | 0           | 0           | 7,0802E-07  | 0           |
| Bacteria | Firmicutes     | Clostridia          | Clostridiales    | Clostridiaceae 1                  | Anaerobacter       | 4,41335E-06 | 1,19633E-05 | 9,21187E-05 | 6,50071E-05 | 3,43366E-06 |
| Bacteria | Proteobacteria | Gammaproteobacteria | Aeromonadales    | Succinivibrionaceae               | Anaerobiospirillum | 0           | 3,00472E-06 | 0           | 0,000680819 | 0           |
| Bacteria | Firmicutes     | Clostridia          | Clostridiales    | Clostridiales_Incertae Sedis XI   | Anaerococcus       | 7,11841E-05 | 4,40557E-05 | 4,7755E-06  | 1,39626E-05 | 1,10136E-05 |
| Bacteria | Firmicutes     | Clostridia          | Clostridiales    | Ruminococcaceae                   | Anaerofilum        | 1,8958E-05  | 3,31082E-05 | 0,001328499 | 3,74322E-06 | 8,22341E-07 |
| Bacteria | Firmicutes     | Clostridia          | Clostridiales    | Eubacteriaceae                    | Anaerofustis       | 9,19292E-06 | 8,52203E-05 | 2,26311E-05 | 0,001480234 | 8,80084E-06 |
| Bacteria | Firmicutes     | Negativicutes       | Selenomonadales  | Veillonellaceae                   | Anaeroglobus       | 1,08774E-06 | 0           | 1,78939E-06 | 0           | 0           |
| Bacteria | Bacteroidetes  | Bacteroidia         | Bacteroidales    | Marinilabiaceae                   | Anaerophaga        | 0           | 0,006918874 | 0,003877434 | 0,003568019 | 0,000815997 |
| Bacteria | Bacteroidetes  | Bacteroidia         | Bacteroidales    | Bacteroidaceae                    | Anaerorhabdus      | 7,04847E-07 | 3,58084E-06 | 0,00028311  | 0,000665639 | 5,00045E-07 |
| Bacteria | Firmicutes     | Clostridia          | Clostridiales    | Incertae Sedis XI                 | Anaerosphaera      | 0           | 0           | 0           | 1,86036E-06 | 0           |
| Bacteria | Firmicutes     | Clostridia          | Clostridiales    | Clostridiaceae 1                  | Anaerosporobacter  | 0,000773948 | 0,000521201 | 0,000236617 | 0,000524648 | 0,000169202 |
| Bacteria | Firmicutes     | Clostridia          | Clostridiales    | Lachnospiraceae                   | Anaerostipes       | 0,000528183 | 0,000270193 | 5,78693E-05 | 0,000240736 | 0,007491562 |
| Bacteria | Firmicutes     | Clostridia          | Clostridiales    | Ruminococcaceae                   | Anaerotruncus      | 0,000814477 | 0,00071868  | 0,003005857 | 0,000127451 | 0,002135014 |
| Bacteria | Firmicutes     | Negativicutes       | Selenomonadales  | Veillonellaceae                   | Anaerovibrio       | 0           | 0,004330536 | 0,003136723 | 0,001769561 | 0,0023892   |
| Bacteria | Firmicutes     | Clostridia          | Clostridiales    | Clostridiales_Incertae Sedis XIII | Anaerovorax        | 0,000678883 | 0,000543155 | 0,001098271 | 0,005374011 | 0,000562862 |
| Bacteria | Firmicutes     | Bacilli             | Bacillales       | Bacillaceae 1                     | Anoxybacillus      | 0           | 0           | 5,88364E-07 | 0           | 0           |

|          |                 |                       |                     |                                |                                 |             |             |             |             |             |
|----------|-----------------|-----------------------|---------------------|--------------------------------|---------------------------------|-------------|-------------|-------------|-------------|-------------|
| Bacteria | Firmicutes      | Clostridia            | Clostridiales       | Clostridiaceae 2               | Anoxynatronum                   | 0           | 1,14513E-06 | 3,32776E-07 | 1,0379E-06  | 0           |
| Bacteria | Proteobacteria  | Betaproteobacteria    | Burkholderiales     | Burkholderiales_incertae_sedis | Aquabacterium                   | 0           | 0           | 0           | 1,88247E-06 | 8,22341E-06 |
| Bacteria | Proteobacteria  | Alphaproteobacteria   | Rhizobiales         | Phyllobacteriaceae             | Aquamicrobium                   | 0           | 0           | 3,0768E-07  | 0           | 2,19209E-06 |
| Bacteria | Proteobacteria  | Gammaproteobacteria   | Legionellales       | Coxiellaceae                   | Aquicella                       | 0           | 0           | 4,98644E-07 | 0           | 1,25726E-06 |
| Bacteria | Planctomycetes  | Planctomycetia        | Planctomycetales    | Planctomycetaceae              | Aquisphaera                     | 0           | 0           | 1,53397E-06 | 2,89771E-07 | 0           |
| Bacteria | Actinobacteria  | Actinobacteria        | Actinomycetales     | Actinomycetaceae               | Arcanobacterium                 | 0           | 0           | 3,18177E-05 | 1,69937E-05 | 0           |
| Bacteria | Proteobacteria  | Deltaproteobacteria   | Myxococcales        | Cystobacteraceae               | Archangium                      | 0           | 0           | 3,52987E-07 | 0           | 0           |
| Bacteria | Proteobacteria  | Epsilonproteobacteria | Campylobacterales   | Campylobacteraceae             | Arcobacter                      | 0           | 0           | 1,92724E-07 | 2,78394E-05 | 0           |
| Bacteria | Bacteroidetes   | Sphingobacteriia      | Sphingobacteriales  | Sphingobacteriaceae            | Arcticibacter                   | 0           | 0           | 0           | 4,23557E-06 | 0           |
| Bacteria | Proteobacteria  | Gammaproteobacteria   | Xanthomonadales     | Xanthomonadaceae               | Arenimonas                      | 0           | 0           | 1,56282E-07 | 0           | 0           |
| Bacteria | Armatimonadetes | Armatimonadetes_gp4   | Armatimonadetes_gp4 | Armatimonadetes_gp4            | Armatimonadetes_gp4             | 0           | 0           | 3,85448E-07 | 0           | 0           |
| Bacteria | Armatimonadetes | Armatimonadetes_gp5   | Armatimonadetes_gp5 | Armatimonadetes_gp5            | Armatimonadetes_gp5             | 0           | 0           | 4,56803E-07 | 2,16547E-07 | 0           |
| Bacteria | Armatimonadetes | Armatimonadia         | Armatimonadales     | Armatimonadaceae               | Armatimonas/Armatimonadetes_gp1 | 0           | 0           | 5,2948E-07  | 0           | 0           |
| Bacteria | Proteobacteria  | Gammaproteobacteria   | Enterobacteriales   | Enterobacteriaceae             | Arsenophonus                    | 0           | 0           | 1,56282E-07 | 0           | 0           |
| Bacteria | Actinobacteria  | Actinobacteria        | Actinomycetales     | Micrococcaceae                 | Arthrobacter                    | 0           | 0           | 1,30032E-05 | 0,004071585 | 7,00995E-06 |
| Bacteria | Actinobacteria  | Actinobacteria        | Coriobacteriales    | Coriobacteriaceae              | Asaccharobacter                 | 0           | 0           | 0           | 3,5401E-07  | 0           |
| Bacteria | Tenericutes     | Mollicutes            | Anaeroplasmatales   | Anaeroplasmataceae             | Asteroleplasma                  | 1,36934E-06 | 0,000248052 | 2,74518E-05 | 0,000305253 | 1,67635E-06 |
| Bacteria | Actinobacteria  | Actinobacteria        | Coriobacteriales    | Coriobacteriaceae              | Atopobium                       | 0           | 1,22217E-06 | 8,56234E-07 | 3,47728E-07 | 0           |
| Bacteria | Firmicutes      | Bacilli               | Lactobacillales     | Carnobacteriaceae              | Atopostipes                     | 0           | 0           | 1,80345E-06 | 9,35203E-07 | 1,33843E-05 |

|                 |                       |                            |                          |                           |                        |                 |                 |                 |                 |                 |
|-----------------|-----------------------|----------------------------|--------------------------|---------------------------|------------------------|-----------------|-----------------|-----------------|-----------------|-----------------|
| <i>Bacteria</i> | <i>Proteobacteria</i> | <i>Alphaproteobacteria</i> | <i>Rhizobiales</i>       | <i>Aurantimonadaceae</i>  | <i>Aurantimonas</i>    | 0               | 0               | 4,52376<br>E-06 | 5,78093<br>E-07 | 0               |
| <i>Bacteria</i> | <i>Proteobacteria</i> | <i>Alphaproteobacteria</i> | <i>Rhizobiales</i>       | <i>Aurantimonadaceae</i>  | <i>Aureimonas</i>      | 0               | 0               | 3,22049<br>E-06 | 2,89771<br>E-07 | 0               |
| <i>Bacteria</i> | <i>Proteobacteria</i> | <i>Betaproteobacteria</i>  | <i>Burkholderiales</i>   | <i>Alcaligenaceae</i>     | <i>Azohydromonas</i>   | 0               | 0               | 1,72335<br>E-07 | 0               | 0               |
| <i>Bacteria</i> | <i>Proteobacteria</i> | <i>Gammaproteobacteria</i> | <i>Pseudomonadales</i>   | <i>Pseudomonadaceae</i>   | <i>Azorhizophilus</i>  | 0               | 0               | 1,72335<br>E-07 | 0               | 0               |
| <i>Bacteria</i> | <i>Proteobacteria</i> | <i>Alphaproteobacteria</i> | <i>Rhodospirillales</i>  | <i>Rhodospirillaceae</i>  | <i>Azospirillum</i>    | 0               | 0               | 1,54656<br>E-07 | 0               | 0               |
| <i>Bacteria</i> | <i>Firmicutes</i>     | <i>Bacilli</i>             | <i>Bacillales</i>        | <i>Bacillaceae I</i>      | <i>Bacillus</i>        | 0               | 0               | 0,01413<br>9802 | 0,00247<br>612  | 0,003627<br>793 |
| <i>Bacteria</i> | <i>Proteobacteria</i> | <i>Deltaproteobacteria</i> | <i>Bdellovibrionales</i> | <i>Bacteriovoracaceae</i> | <i>Bacteriovorax</i>   | 0               | 0               | 0               | 0               | 4,11171E<br>-06 |
| <i>Bacteria</i> | <i>Bacteroidetes</i>  | <i>Bacteroidia</i>         | <i>Bacteroidales</i>     | <i>Bacteroidaceae</i>     | <i>Bacteroides</i>     | 0,05184<br>3576 | 0,0120335<br>97 | 0,01998<br>306  | 0,00130<br>5522 | 0,028344<br>895 |
| <i>Bacteria</i> | <i>Proteobacteria</i> | <i>Alphaproteobacteria</i> | <i>Rhizobiales</i>       | <i>Bradyrhizobiaceae</i>  | <i>Balneimonas</i>     | 0               | 0               | 3,21591<br>E-07 | 0               | 0               |
| <i>Bacteria</i> | <i>Bacteroidetes</i>  | <i>Bacteroidia</i>         | <i>Bacteroidales</i>     | <i>Porphyromonadaceae</i> | <i>Barnesiella</i>     | 0,00792<br>95   | 0,0261486<br>33 | 0,05301<br>9252 | 0,01285<br>846  | 0,011829<br>223 |
| <i>Bacteria</i> | <i>Firmicutes</i>     | <i>Bacilli</i>             | <i>Lactobacillales</i>   | <i>Enterococcaceae</i>    | <i>Bavariococcus</i>   | 0               | 0               | 1,92724<br>E-07 | 0               | 0               |
| <i>Bacteria</i> | <i>Proteobacteria</i> | <i>Deltaproteobacteria</i> | <i>Bdellovibrionales</i> | <i>Bdellovibrionaceae</i> | <i>Bdellovibrio</i>    | 1,06266<br>E-06 | 0               | 1,06298<br>E-06 | 5,78093<br>E-07 | 0               |
| <i>Bacteria</i> | <i>Proteobacteria</i> | <i>Alphaproteobacteria</i> | <i>Rhizobiales</i>       | <i>Beijerinckiaceae</i>   | <i>Beijerinckia</i>    | 0               | 0               | 2,13319<br>E-06 | 4,02996<br>E-07 | 4,11171E<br>-06 |
| <i>Bacteria</i> | <i>Chloroflexi</i>    | <i>Anaerolineae</i>        | <i>Anaerolineales</i>    | <i>Anaerolineaceae</i>    | <i>Bellilinea</i>      | 0               | 0               | 0               | 8,14961<br>E-07 | 0               |
| <i>Bacteria</i> | <i>Proteobacteria</i> | <i>Alphaproteobacteria</i> | <i>Rhodospirillales</i>  | <i>Acetobacteraceae</i>   | <i>Belnapia</i>        | 0               | 0               | 3,31149<br>E-07 | 0               | 0               |
| <i>Bacteria</i> | <i>Proteobacteria</i> | <i>Betaproteobacteria</i>  | <i>Neisseriales</i>      | <i>Neisseriaceae</i>      | <i>Bergeriella</i>     | 0               | 0               | 0               | 0               | 1,46139E<br>-06 |
| <i>Bacteria</i> | <i>Bacteroidetes</i>  | <i>Flavobacteriia</i>      | <i>Flavobacteriales</i>  | <i>Flavobacteriaceae</i>  | <i>Bergeyella</i>      | 0               | 0               | 0               | 5,04636<br>E-05 | 0               |
| <i>Bacteria</i> | <i>Firmicutes</i>     | <i>Bacilli</i>             | <i>Bacillales</i>        | <i>Planococcaceae</i>     | <i>Bhargavaea</i>      | 0               | 0               | 5,30892<br>E-07 | 0               | 0               |
| <i>Bacteria</i> | <i>Proteobacteria</i> | <i>Gammaproteobacteria</i> | <i>Pasteurellales</i>    | <i>Pasteurellaceae</i>    | <i>Bibersteinia</i>    | 0               | 0               | 3,52987<br>E-07 | 0               | 0               |
| <i>Bacteria</i> | <i>Actinobacteria</i> | <i>Actinobacteria</i>      | <i>Bifidobacteriales</i> | <i>Bifidobacteriaceae</i> | <i>Bifidobacterium</i> | 0               | 2,201E-05       | 0,00134<br>7169 | 0               | 0,000223<br>29  |

|          |                |                                |                                |                                |                                |                 |                 |                 |                 |                 |
|----------|----------------|--------------------------------|--------------------------------|--------------------------------|--------------------------------|-----------------|-----------------|-----------------|-----------------|-----------------|
| Bacteria | Proteobacteria | Deltaproteobacteria            | Desulfovibrionales             | Desulfovibrionaceae            | Bilophila                      | 0,00032<br>2018 | 0,0001987<br>77 | 0,00019<br>513  | 0,00040<br>411  | 8,09122E<br>-05 |
| Bacteria | Acidobacteria  | Acidobacteria_Gp4              | Blastocatella                  | Blastocatella                  | Blastocatella                  | 0               | 0               | 8,82467<br>E-07 | 6,49642<br>E-07 | 0               |
| Bacteria | Actinobacteria | Actinobacteria                 | Actinomycetales                | Geodermatophilaceae            | Blastococcus                   | 0               | 0               | 6,66021<br>E-07 | 1,24024<br>E-06 | 0               |
| Bacteria | Planctomycetes | Planctomycetia                 | Planctomycetales               | Planctomycetaceae              | Blastopirellula                | 1,15613<br>E-06 | 5,16562E-<br>06 | 1,7428E<br>-05  | 2,16547<br>E-07 | 0               |
| Bacteria | Firmicutes     | Clostridia                     | Clostridiales                  | Lachnospiraceae                | Blautia                        | 0,00408<br>1855 | 0,0014124<br>72 | 0,00097<br>3308 | 0,00096<br>0842 | 0,001524<br>311 |
| Bacteria | Proteobacteria | Betaproteobacteria             | Burkholderiales                | Alcaligenaceae                 | Bordetella                     | 0               | 0               | 6,01042<br>E-07 | 0,00017<br>1604 | 0               |
| Bacteria | Proteobacteria | Alphaproteobacteria            | Rhizobiales                    | Bradyrhizobiaceae              | Bosea                          | 1,06165<br>E-06 | 1,36064E-<br>06 | 1,12856<br>E-06 | 2,16547<br>E-07 | 5,00045E<br>-07 |
| Bacteria | Actinobacteria | Actinobacteria                 | Actinomycetales                | Dermabacteraceae               | Brachybacterium                | 0               | 0               | 1,57647<br>E-05 | 2,16547<br>E-07 | 2,67644E<br>-06 |
| Bacteria | Proteobacteria | Betaproteobacteria             | Burkholderiales                | Comamonadaceae                 | Brachymonas                    | 0               | 0               | 0               | 5,78093<br>E-07 | 0               |
| Bacteria | Proteobacteria | Alphaproteobacteria            | Rhizobiales                    | Bradyrhizobiaceae              | Bradyrhizobium                 | 0               | 0               | 2,10514<br>E-06 | 1,44606<br>E-05 | 1,14072E<br>-05 |
| Bacteria | BRC1           | BRC1_genera_incertae<br>_sedis | BRC1_genera_incertae<br>_sedis | BRC1_genera_incertae<br>_sedis | BRC1_genera_in<br>certae_sedis | 0               | 0               | 0               | 2,16547<br>E-07 | 0               |
| Bacteria | Firmicutes     | Bacilli                        | Bacillales                     | Paenibacillaceae 1             | Brevibacillus                  | 0               | 0               | 1,76493<br>E-07 | 0               | 0               |
| Bacteria | Actinobacteria | Actinobacteria                 | Actinomycetales                | Brevibacteriaceae              | Brevibacterium                 | 3,42656<br>E-06 | 0               | 1,96173<br>E-06 | 6,2012E<br>-07  | 5,98119E<br>-06 |
| Bacteria | Proteobacteria | Alphaproteobacteria            | Caulobacterales                | Caulobacteraceae               | Brevundimonas                  | 2,56583<br>E-06 | 0               | 1,5541E<br>-06  | 1,00365<br>E-06 | 2,37538E<br>-06 |
| Bacteria | Firmicutes     | Bacilli                        | Bacillales                     | Listeriaceae                   | Brochothrix                    | 0               | 0               | 0               | 0               | 2,15875E<br>-06 |
| Bacteria | Actinobacteria | Actinobacteria                 | Actinomycetales                | Propionibacteriaceae           | Brooklawnia                    | 0               | 0               | 9,6362E<br>-07  | 0               | 0               |
| Bacteria | Firmicutes     | Erysipelotrichia               | Erysipelotrichales             | Erysipelotrichaceae            | Bulleidia                      | 3,12573<br>E-06 | 0,0020457<br>83 | 0,00067<br>8475 | 0,00083<br>6796 | 0,000102<br>553 |
| Bacteria | Proteobacteria | Betaproteobacteria             | Burkholderiales                | Burkholderiaceae               | Burkholderia                   | 0               | 0               | 1,18051<br>E-06 | 2,89771<br>E-07 | 1,50014E<br>-06 |
| Bacteria | Firmicutes     | Clostridia                     | Clostridiales                  | Ruminococcaceae                | Butyricoccus                   | 0,00556<br>8386 | 0,0009204<br>45 | 0,00089<br>9393 | 0,00088<br>4279 | 0,003761<br>197 |
| Bacteria | Bacteroidetes  | Bacteroidia                    | Bacteroidales                  | Porphyromonadaceae             | Butyricimonas                  | 0,00274<br>1497 | 4,66523E-<br>05 | 9,51575<br>E-05 | 5,46908<br>E-05 | 0,000166<br>455 |

|          |                |                       |                       |                       |                       |             |             |             |             |             |
|----------|----------------|-----------------------|-----------------------|-----------------------|-----------------------|-------------|-------------|-------------|-------------|-------------|
| Bacteria | Firmicutes     | Clostridia            | Clostridiales         | Lachnospiraceae       | Butyrivibrio          | 0           | 8,18694E-06 | 0,00030855  | 3,57345E-06 | 4,38417E-06 |
| Bacteria | Proteobacteria | Deltaproteobacteria   | Myxococcales          | Polyangiaceae         | Byssovorax            | 0           | 0           | 5,17006E-07 | 0           | 0           |
| Bacteria | Proteobacteria | Betaproteobacteria    | Burkholderiales       | Comamonadaceae        | Caenimonas            | 0           | 0           | 0           | 0           | 7,09936E-06 |
| Bacteria | Chloroflexi    | Caldilineae           | Caldilineales         | Caldilineaceae        | Caldilinea            | 1,15613E-06 | 0           | 0           | 0           | 0           |
| Bacteria | Proteobacteria | Betaproteobacteria    | Burkholderiales       | Comamonadaceae        | Caldimonas            | 0           | 0           | 3,12565E-07 | 0           | 0           |
| Bacteria | Proteobacteria | Epsilonproteobacteria | Campylobacterales     | Campylobacteraceae    | Campylobacter         | 1,41169E-05 | 0,003820261 | 0,0005449   | 0,008093497 | 5,87048E-05 |
| Bacteria | Proteobacteria | Gammaproteobacteria   | Candidatus Carsonella | Candidatus Carsonella | Candidatus Carsonella | 9,43072E-06 | 2,60525E-06 | 1,48739E-06 | 0           | 0           |
| Bacteria | Acidobacteria  | Acidobacteria_Gp1     | Candidatus Koribacter | Candidatus Koribacter | Candidatus Koribacter | 0           | 0           | 1,92029E-07 | 6,2012E-07  | 0           |
| Bacteria | Bacteroidetes  | Flavobacteriia        | Flavobacteriales      | Flavobacteriaceae     | Capnocytophaga        | 1,67017E-06 | 0           | 0           | 0           | 2,00018E-06 |
| Bacteria | Proteobacteria | Gammaproteobacteria   | Cardiobacteriales     | Cardiobacteriaceae    | Cardiobacterium       | 0           | 0           | 1,56282E-07 | 0           | 0           |
| Bacteria | Firmicutes     | Bacilli               | Lactobacillales       | Carnobacteriaceae     | Carnobacterium        | 0           | 0           | 1,27464E-07 | 0           | 3,454E-06   |
| Bacteria | Firmicutes     | Bacilli               | Bacillales            | Planococcaceae        | Caryophanon           | 0           | 1,22217E-06 | 6,7923E-05  | 0,000523828 | 2,42821E-05 |
| Bacteria | Proteobacteria | Alphaproteobacteria   | Rhodobacterales       | Rhodobacteraceae      | Catellibacterium      | 0           | 0           | 1,92029E-07 | 0           | 0           |
| Bacteria | Firmicutes     | Erysipelotrichia      | Erysipelotrichales    | Erysipelotrichaceae   | Catenibacterium       | 0           | 2,23061E-05 | 3,68772E-07 | 0,0008913   | 0           |
| Bacteria | Firmicutes     | Clostridia            | Clostridiales         | Lachnospiraceae       | Catonella             | 8,41608E-06 | 3,3697E-06  | 4,8974E-06  | 0,004276762 | 0           |
| Bacteria | Proteobacteria | Alphaproteobacteria   | Caulobacterales       | Caulobacteraceae      | Caulobacter           | 0           | 0           | 0           | 8,8341E-07  | 0           |
| Bacteria | Actinobacteria | Actinobacteria        | Actinomycetales       | Cellulomonadaceae     | Cellulomonas          | 0           | 0           | 1,10121E-06 | 1,01429E-06 | 0           |
| Bacteria | Firmicutes     | Clostridia            | Clostridiales         | Ruminococcaceae       | Cellulosibacter       | 0,000161548 | 0,000584094 | 0,00024638  | 1,5856E-05  | 3,11484E-05 |
| Bacteria | Actinobacteria | Actinobacteria        | Actinomycetales       | Promicromonosporaceae | Cellulosimicrobium    | 0           | 0           | 1,13133E-06 | 2,16547E-07 | 5,0482E-06  |
| Bacteria | Firmicutes     | Negativicutes         | Selenomonadales       | Veillonellaceae       | Centipeda             | 0           | 0           | 4,50781E-07 | 0           | 0           |

|          |                           |                     |                   |                    |                                  |             |             |             |             |             |
|----------|---------------------------|---------------------|-------------------|--------------------|----------------------------------|-------------|-------------|-------------|-------------|-------------|
| Bacteria | Verrucomicrobia           | Opitutae            | Puniceococcales   | Puniceococcaceae   | Cerasicoccus                     | 0           | 2,52479E-06 | 7,08043E-07 | 1,1258E-06  | 1,68584E-06 |
| Bacteria | Bacteroidetes             | Cytophagia          | Cytophagales      | Flammeovirgaceae   | Cesiribacter                     | 0           | 0           | 1,27464E-07 | 0           | 0           |
| Bacteria | Fusobacteria              | Fusobacteriia       | Fusobacteriales   | Fusobacteriaceae   | Cetobacterium                    | 0           | 0           | 3,52402E-05 | 0           | 4,06231E-05 |
| Bacteria | Proteobacteria            | Alphaproteobacteria | Rhizobiales       | Beijerinckiaceae   | Chelatococcus                    | 0           | 0           | 8,61676E-07 | 3,23593E-07 | 0           |
| Bacteria | Proteobacteria            | Gammaproteobacteria | Pasteurellales    | Pasteurellaceae    | Chelonobacter                    | 0           | 0           | 4,98644E-07 | 0           | 0           |
| Bacteria | Chlamydiae                | Chlamydiia          | Chlamydiales      | Chlamydiaceae      | Chlamydia                        | 0           | 0,00069837  | 7,64786E-07 | 0,000768759 | 0           |
| Bacteria | Chlamydiae                | Chlamydiia          | Chlamydiales      | Chlamydiaceae      | Chlamydomphila                   | 0           | 0           | 0           | 2,16547E-07 | 0           |
| Bacteria | Cyanobacteria/Chloroplast | Chloroplast         | Chloroplast       | Chloroplast        | Chlorophyta                      | 2,17548E-06 | 1,22217E-06 | 0           | 4,50315E-07 | 7,30695E-07 |
| Bacteria | Bacteroidetes             | Flavobacteriia      | Flavobacteriales  | Flavobacteriaceae  | Chryseobacterium                 | 4,60748E-06 | 0           | 1,49143E-05 | 4,61763E-06 | 6,31162E-06 |
| Bacteria | Firmicutes                | Bacilli             | Bacillales        | Planococcaceae     | Chryseomicrobium                 | 1,06266E-06 | 0           | 5,11598E-06 | 6,49642E-07 | 0           |
| Bacteria | Armatimonadetes           | Chthonomonadetes    | Chthonomonadales  | Chthonomonadaceae  | Chthonomonas/Armatimonadetes_gp3 | 0           | 0           | 2,8157E-07  | 0           | 0           |
| Bacteria | Proteobacteria            | Alphaproteobacteria | Rhodobacterales   | Rhodobacteraceae   | Citricella                       | 0           | 0           | 5,76087E-07 | 0           | 0           |
| Bacteria | Actinobacteria            | Actinobacteria      | Actinomycetales   | Micrococcaceae     | Citricoccus                      | 0           | 0           | 3,52987E-07 | 0           | 0           |
| Bacteria | Proteobacteria            | Gammaproteobacteria | Enterobacteriales | Enterobacteriaceae | Citrobacter                      | 5,22367E-06 | 2,44434E-06 | 0,00011959  | 4,8808E-06  | 1,15945E-05 |
| Bacteria | Synergistetes             | Synergistia         | Synergistales     | Synergistaceae     | Cloacibacillus                   | 0           | 0,000206507 | 1,53944E-05 | 7,71787E-07 | 0           |
| Bacteria | Bacteroidetes             | Flavobacteriia      | Flavobacteriales  | Flavobacteriaceae  | Cloacibacterium                  | 7,38594E-07 | 0           | 0           | 1,03831E-05 | 1,64468E-06 |
| Bacteria | Firmicutes                | Clostridia          | Clostridiales     | Clostridiaceae 3   | Clostridiisalibacter             | 0           | 0           | 1,54656E-07 | 0           | 0           |
| Bacteria | Firmicutes                | Clostridia          | Clostridiales     | Ruminococcaceae    | Clostridium III                  | 0,000629549 | 0,00058693  | 0,00059249  | 4,98188E-06 | 4,59565E-05 |
| Bacteria | Firmicutes                | Clostridia          | Clostridiales     | Ruminococcaceae    | Clostridium IV                   | 0,022132887 | 0,016273929 | 0,020885222 | 0,002763672 | 0,020615903 |

|          |                 |                     |                     |                       |                           |             |             |             |             |             |
|----------|-----------------|---------------------|---------------------|-----------------------|---------------------------|-------------|-------------|-------------|-------------|-------------|
| Bacteria | Firmicutes      | Clostridia          | Clostridiales       | Clostridiaceae I      | Clostridium sensu stricto | 0,000654546 | 0,001292071 | 0,004872062 | 0,003179614 | 0,001380002 |
| Bacteria | Firmicutes      | Clostridia          | Clostridiales       | Peptostreptococcaceae | Clostridium XI            | 0,003283809 | 0,00247612  | 0,002555779 | 0,005659529 | 0,018140686 |
| Bacteria | Fusobacteria    | Fusobacteriia       | Fusobacteriales     | Fusobacteriaceae      | Clostridium XIX           | 0           | 0           | 1,80399E-05 | 2,07796E-06 | 0           |
| Bacteria | Firmicutes      | Clostridia          | Clostridiales       | Lachnospiraceae       | Clostridium XIVa          | 0,037975199 | 0,048915641 | 0,078022258 | 0,070091924 | 0,064187634 |
| Bacteria | Firmicutes      | Clostridia          | Clostridiales       | Lachnospiraceae       | Clostridium XIVb          | 0,002114271 | 0,000863059 | 0,002317586 | 0,000288226 | 0,001015246 |
| Bacteria | Firmicutes      | Erysipelotrichia    | Erysipelotrichales  | Erysipelotrichaceae   | Clostridium XVIII         | 0,003130837 | 0,000121553 | 0,00039206  | 0,00146352  | 0,000893301 |
| Bacteria | Actinobacteria  | Actinobacteria      | Coriobacteriales    | Coriobacteriaceae     | Collinsella               | 3,65015E-05 | 1,66297E-05 | 4,84107E-05 | 0,000125809 | 6,98399E-05 |
| Bacteria | Proteobacteria  | Betaproteobacteria  | Burkholderiales     | Comamonadaceae        | Comamonas                 | 0           | 0           | 1,06372E-05 | 4,70618E-07 | 3,80978E-06 |
| Bacteria | Actinobacteria  | Actinobacteria      | Solirubrobacterales | Conexibacteraceae     | Conexibacter              | 1,15613E-06 | 0           | 8,44179E-07 | 0           | 0           |
| Bacteria | Firmicutes      | Erysipelotrichia    | Erysipelotrichales  | Erysipelotrichaceae   | Coprobacillus             | 0,001452342 | 0,000233167 | 0,000232017 | 0,00012997  | 0,001189359 |
| Bacteria | Firmicutes      | Clostridia          | Clostridiales       | Lachnospiraceae       | Coproccoccus              | 0,008928015 | 0,004204126 | 0,001588002 | 0,002454789 | 0,001001681 |
| Bacteria | Verrucomicrobia | Opitutae            | Puniceococcales     | Puniceicoccaceae      | Coralimargarita           | 6,67592E-05 | 0,000307531 | 3,88577E-05 | 1,70017E-05 | 0,000248547 |
| Bacteria | Proteobacteria  | Deltaproteobacteria | Myxococcales        | Myxococcaceae         | Corallococcus             | 0           | 0           | 0           | 0           | 1,00009E-06 |
| Bacteria | Actinobacteria  | Actinobacteria      | Coriobacteriales    | Coriobacteriaceae     | Coriobacterium            | 6,81966E-06 | 0           | 1,54656E-07 | 0           | 0           |
| Bacteria | Actinobacteria  | Actinobacteria      | Actinomycetales     | Corynebacteriaceae    | Corynebacterium           | 1,86243E-05 | 2,5392E-05  | 6,46589E-05 | 8,69254E-06 | 0,000183527 |
| Bacteria | Proteobacteria  | Gammaproteobacteria | Enterobacteriales   | Enterobacteriaceae    | Cosenzaea                 | 0           | 0           | 0           | 3,5401E-07  | 0           |
| Bacteria | Proteobacteria  | Gammaproteobacteria | Legionellales       | Coxiellaceae          | Coxiella                  | 0           | 0           | 7,68116E-07 | 0,000110221 | 0           |
| Bacteria | Proteobacteria  | Alphaproteobacteria | Rhodospirillales    | Acetobacteraceae      | Craurococcus              | 0           | 0           | 3,31149E-07 | 0           | 0           |
| Bacteria | Proteobacteria  | Gammaproteobacteria | Enterobacteriales   | Enterobacteriaceae    | Cronobacter               | 0           | 0           | 4,40386E-05 | 0           | 1,82434E-05 |
| Bacteria | Bacteroidetes   | Flavobacteriia      | Flavobacteriales    | Flavobacteriaceae     | Cruoricaptor              | 0           | 1,08505E-05 | 1,19665E-05 | 1,03755E-05 | 4,19088E-07 |

|          |                     |                     |                    |                     |                     |             |             |             |             |             |
|----------|---------------------|---------------------|--------------------|---------------------|---------------------|-------------|-------------|-------------|-------------|-------------|
| Bacteria | Proteobacteria      | Betaproteobacteria  | Burkholderiales    | Burkholderiaceae    | Cupriavidus         | 0           | 0           | 1,54656E-07 | 0           | 0           |
| Bacteria | Actinobacteria      | Actinobacteria      | Actinomycetales    | Microbacteriaceae   | Curtobacterium      | 0           | 0           | 7,47966E-07 | 0           | 0           |
| Bacteria | Proteobacteria      | Betaproteobacteria  | Burkholderiales    | Comamonadaceae      | Curvibacter         | 0           | 0           | 9,38663E-07 | 0           | 7,46325E-06 |
| Bacteria | Proteobacteria      | Deltaproteobacteria | Myxococcales       | Cystobacteraceae    | Cystobacter         | 0           | 0           | 1,76493E-07 | 0           | 0           |
| Bacteria | Actinobacteria      | Actinobacteria      | Actinomycetales    | Micromonosporaceae  | Dactylosporangium   | 0           | 0           | 3,12565E-07 | 0           | 0           |
| Bacteria | Proteobacteria      | Betaproteobacteria  | Rhodocyclales      | Rhodocyclaceae      | Dechloromonas       | 0           | 0           | 1,56282E-07 | 0           | 0           |
| Bacteria | Firmicutes          | Clostridia          | Clostridiales      | Defluviitaleaceae   | Defluviitalea       | 0,000757012 | 0,000140238 | 0,000139525 | 0,000918847 | 0,000154871 |
| Bacteria | Firmicutes          | Clostridia          | Clostridiales      | Peptococcaceae 1    | Dehalobacter        | 0           | 0           | 1,40785E-07 | 0           | 0           |
| Bacteria | Deinococcus-Thermus | Deinococci          | Deinococcales      | Deinococcaceae      | Deinococcus         | 3,4684E-06  | 0           | 1,80215E-07 | 4,70618E-07 | 8,635E-07   |
| Bacteria | Proteobacteria      | Betaproteobacteria  | Burkholderiales    | Comamonadaceae      | Delftia             | 1,06266E-06 | 1,07943E-06 | 0           | 3,95755E-06 | 8,50671E-06 |
| Bacteria | Actinobacteria      | Actinobacteria      | Actinomycetales    | Demequinaceae       | Demequina           | 0           | 0           | 7,20861E-07 | 0           | 0           |
| Bacteria | Firmicutes          | Negativicutes       | Selenomonadales    | Veillonellaceae     | Dendrosporobacter   | 0           | 0           | 0           | 1,20806E-06 | 0           |
| Bacteria | Actinobacteria      | Actinobacteria      | Actinomycetales    | Dermacoccaceae      | Dermacoccus         | 0           | 0           | 2,09912E-06 | 0           | 0           |
| Bacteria | Firmicutes          | Bacilli             | Lactobacillales    | Carnobacteriaceae   | Desemzia            | 0           | 0           | 4,50781E-07 | 3,24821E-06 | 0           |
| Bacteria | Proteobacteria      | Deltaproteobacteria | Desulfobacterales  | Desulfobacteraceae  | Desulfatitalea      | 0           | 3,25208E-06 | 2,08693E-05 | 3,23593E-07 | 0           |
| Bacteria | Proteobacteria      | Deltaproteobacteria | Desulfobacterales  | Desulfobulbaceae    | Desulfobulbus       | 0           | 0           | 0           | 6,95456E-07 | 0           |
| Bacteria | Proteobacteria      | Deltaproteobacteria | Desulfovibrionales | Desulfomicrobiaceae | Desulfomicrobium    | 0           | 2,52479E-06 | 0           | 2,38682E-06 | 0           |
| Bacteria | Proteobacteria      | Deltaproteobacteria | Desulfovibrionales | Desulfohalobiaceae  | Desulfovermiculus   | 0           | 0           | 5,2948E-07  | 0           | 0           |
| Bacteria | Proteobacteria      | Deltaproteobacteria | Desulfovibrionales | Desulfovibrionaceae | Desulfovibrio       | 0,000494569 | 0,002228649 | 0,002641559 | 0,00099132  | 0,001891364 |
| Bacteria | Firmicutes          | Clostridia          | Clostridiales      | Incertae Sedis XI   | Dethiosulfatibacter | 0           | 0           | 1,61593E-06 | 5,2161E-05  | 0           |



|                 |                       |                            |                          |                           |                        |             |             |             |             |             |
|-----------------|-----------------------|----------------------------|--------------------------|---------------------------|------------------------|-------------|-------------|-------------|-------------|-------------|
| <i>Bacteria</i> | <i>Proteobacteria</i> | <i>Alphaproteobacteria</i> | <i>Rhizobiales</i>       | <i>Hyphomicrobiaceae</i>  | <i>Devosia</i>         | 0           | 0           | 9,8853E-06  | 1,69077E-06 | 0           |
| <i>Bacteria</i> | <i>Firmicutes</i>     | <i>Negativicutes</i>       | <i>Selenomonadales</i>   | <i>Veillonellaceae</i>    | <i>Dialister</i>       | 0,004166014 | 0,002024378 | 0,000729352 | 2,03534E-05 | 1,46139E-06 |
| <i>Bacteria</i> | <i>Actinobacteria</i> | <i>Actinobacteria</i>      | <i>Actinomycetales</i>   | <i>Dietziaceae</i>        | <i>Dietzia</i>         | 1,07312E-05 | 9,61809E-07 | 3,2231E-05  | 1,23742E-06 | 2,07444E-05 |
| <i>Bacteria</i> | <i>Proteobacteria</i> | <i>Gammaproteobacteria</i> | <i>Legionellales</i>     | <i>Coxiellaceae</i>       | <i>Diplorickettsia</i> | 0           | 0           | 0           | 0           | 1,29525E-06 |
| <i>Bacteria</i> | <i>Proteobacteria</i> | <i>Gammaproteobacteria</i> | <i>Xanthomonadales</i>   | <i>Xanthomonadaceae</i>   | <i>Dokdonella</i>      | 0           | 0           | 0           | 4,17777E-07 | 0           |
| <i>Bacteria</i> | <i>Firmicutes</i>     | <i>Bacilli</i>             | <i>Lactobacillales</i>   | <i>Carnobacteriaceae</i>  | <i>Dolosigranulum</i>  | 2,94302E-06 | 5,16903E-06 | 0           | 0           | 5,80361E-06 |
| <i>Bacteria</i> | <i>Proteobacteria</i> | <i>Alphaproteobacteria</i> | <i>Rhodospirillales</i>  | <i>Rhodospirillaceae</i>  | <i>Dongia</i>          | 0           | 0           | 2,84082E-06 | 0           | 5,32275E-06 |
| <i>Bacteria</i> | <i>Firmicutes</i>     | <i>Clostridia</i>          | <i>Clostridiales</i>     | <i>Lachnospiraceae</i>    | <i>Dorea</i>           | 0,00114792  | 0,00087763  | 0,001033214 | 0,00111602  | 0,001553794 |
| <i>Bacteria</i> | <i>Proteobacteria</i> | <i>Betaproteobacteria</i>  | <i>Burkholderiales</i>   | <i>Oxalobacteraceae</i>   | <i>Duganella</i>       | 0           | 0           | 1,56282E-07 | 0           | 0           |
| <i>Bacteria</i> | <i>Proteobacteria</i> | <i>Gammaproteobacteria</i> | <i>Xanthomonadales</i>   | <i>Xanthomonadaceae</i>   | <i>Dyella</i>          | 0           | 0           | 0           | 0           | 1,15571E-05 |
| <i>Bacteria</i> | <i>Bacteroidetes</i>  | <i>Bacteroidia</i>         | <i>Bacteroidales</i>     | <i>Porphyromonadaceae</i> | <i>Dysgonomonas</i>    | 0           | 0           | 2,89086E-06 | 1,06203E-06 | 0           |
| <i>Bacteria</i> | <i>Acidobacteria</i>  | <i>Acidobacteria_Gp1</i>   | <i>Edaphobacter</i>      | <i>Edaphobacter</i>       | <i>Edaphobacter</i>    | 0           | 0           | 4,65595E-07 | 0           | 0           |
| <i>Bacteria</i> | <i>Actinobacteria</i> | <i>Actinobacteria</i>      | <i>Coriobacteriales</i>  | <i>Coriobacteriaceae</i>  | <i>Eggerthella</i>     | 0           | 0           | 8,58518E-06 | 0,000122553 | 2,90426E-05 |
| <i>Bacteria</i> | <i>Elusimicrobia</i>  | <i>Elusimicrobia</i>       | <i>Elusimicrobiales</i>  | <i>Elusimicrobiaceae</i>  | <i>Elusimicrobium</i>  | 0,006730554 | 0,001870505 | 0,000328789 | 0           | 0,008924486 |
| <i>Bacteria</i> | <i>Bacteroidetes</i>  | <i>Flavobacteriia</i>      | <i>Flavobacteriales</i>  | <i>Flavobacteriaceae</i>  | <i>Empedobacter</i>    | 0           | 0           | 5,71263E-06 | 0           | 5,00045E-07 |
| <i>Bacteria</i> | <i>Proteobacteria</i> | <i>Gammaproteobacteria</i> | <i>Pseudomonadales</i>   | <i>Moraxellaceae</i>      | <i>Enhydrobacter</i>   | 1,2035E-05  | 4,63257E-06 | 1,47462E-05 | 8,43151E-06 | 7,13396E-06 |
| <i>Bacteria</i> | <i>Proteobacteria</i> | <i>Gammaproteobacteria</i> | <i>Enterobacteriales</i> | <i>Enterobacteriaceae</i> | <i>Enterobacter</i>    | 6,8467E-07  | 2,40151E-06 | 0,000448837 | 9,31626E-06 | 5,22647E-05 |
| <i>Bacteria</i> | <i>Firmicutes</i>     | <i>Bacilli</i>             | <i>Lactobacillales</i>   | <i>Enterococcaceae</i>    | <i>Enterococcus</i>    | 5,05272E-06 | 1,30262E-06 | 2,30364E-05 | 1,49512E-06 | 0,000553352 |
| <i>Bacteria</i> | <i>Actinobacteria</i> | <i>Actinobacteria</i>      | <i>Coriobacteriales</i>  | <i>Coriobacteriaceae</i>  | <i>Enterorhabdus</i>   | 4,56347E-05 | 1,28947E-05 | 0,000581432 | 1,70568E-05 | 1,17942E-05 |
| <i>Bacteria</i> | <i>Bacteroidetes</i>  | <i>Flavobacteriia</i>      | <i>Flavobacteriales</i>  | <i>Flavobacteriaceae</i>  | <i>Epilithonimonas</i> | 0           | 0           | 0           | 0           | 8,22341E-07 |

|          |                |                     |                    |                                 |                                    |             |             |             |             |             |
|----------|----------------|---------------------|--------------------|---------------------------------|------------------------------------|-------------|-------------|-------------|-------------|-------------|
| Bacteria | Firmicutes     | Erysipelotrichia    | Erysipelotrichales | Erysipelotrichaceae             | Erysipelotrichaceae_incertae_sedis | 0,002981668 | 0,00040828  | 0,00026959  | 0,000382323 | 0,000227416 |
| Bacteria | Proteobacteria | Gammaproteobacteria | Enterobacteriales  | Enterobacteriaceae              | Escherichia/Shigella               | 0,000891106 | 0,00046004  | 0,027220755 | 0,00084495  | 0,002297988 |
| Bacteria | Firmicutes     | Clostridia          | Clostridiales      | Ruminococcaceae                 | Ethanoligenens                     | 0,000589745 | 0,000616109 | 0,000496218 | 8,69854E-05 | 0,000653798 |
| Bacteria | Firmicutes     | Clostridia          | Clostridiales      | Eubacteriaceae                  | Eubacterium                        | 0,00282379  | 0,00401786  | 0,00761159  | 0,002586874 | 0,001832123 |
| Bacteria | Actinobacteria | Actinobacteria      | Euzebyales         | Euzebyaceae                     | Euzebya                            | 0           | 0           | 3,52987E-07 | 0           | 0           |
| Bacteria | Firmicutes     | Bacilli             | Bacillales         | Bacillales_Incertae_Sedis_XII   | Exiguobacterium                    | 0           | 0           | 5,82297E-06 | 0           | 0           |
| Bacteria | Firmicutes     | Bacilli             | Lactobacillales    | Aerococcaceae                   | Facklamia                          | 0           | 0           | 2,54835E-06 | 3,88729E-06 | 1,99107E-05 |
| Bacteria | Firmicutes     | Clostridia          | Clostridiales      | Ruminococcaceae                 | Faecalibacterium                   | 0,020893011 | 0,014153137 | 0,002024029 | 0,013052958 | 0,00246611  |
| Bacteria | Firmicutes     | Bacilli             | Bacillales         | Bacillaceae_1                   | Falsibacillus                      | 0           | 0           | 6,19072E-06 | 0           | 1,727E-06   |
| Bacteria | Firmicutes     | Clostridia          | Clostridiales      | Ruminococcaceae                 | Fastidiosipila                     | 2,07419E-06 | 3,50262E-06 | 2,03609E-06 | 3,5401E-07  | 5,43731E-06 |
| Bacteria | Bacteroidetes  | Sphingobacteriia    | Sphingobacteriales | Chitinophagaceae                | Ferruginibacter                    | 0           | 0           | 1,37772E-06 | 0           | 0           |
| Bacteria | Firmicutes     | Clostridia          | Clostridiales      | Clostridiaceae_1                | Fervidicella                       | 0           | 0           | 3,17688E-06 | 0           | 0           |
| Bacteria | Fibrobacteres  | Fibrobacteria       | Fibrobacterales    | Fibrobacteraceae                | Fibrobacter                        | 0           | 0,000746676 | 0,00226435  | 0,00128398  | 0,000893402 |
| Bacteria | Firmicutes     | Clostridia          | Clostridiales      | Clostridiales_Incertae_Sedis_XI | Finegoldia                         | 4,69713E-05 | 1,77562E-05 | 2,32134E-06 | 2,00574E-06 | 9,76735E-06 |
| Bacteria | Bacteroidetes  | Sphingobacteriia    | Sphingobacteriales | Chitinophagaceae                | Flavisolibacter                    | 0           | 0           | 2,48547E-06 | 1,15619E-06 | 7,30695E-07 |
| Bacteria | Bacteroidetes  | Flavobacteriia      | Flavobacteriales   | Flavobacteriaceae               | Flavobacterium                     | 1,15613E-06 | 0           | 2,48123E-06 | 1,27858E-06 | 7,64216E-06 |
| Bacteria | Firmicutes     | Clostridia          | Clostridiales      | Ruminococcaceae                 | Flavonifractor                     | 0,003022801 | 0,005291291 | 0,003955598 | 0,002171858 | 0,001563069 |
| Bacteria | Bacteroidetes  | Flavobacteriia      | Flavobacteriales   | Cryomorphaceae                  | Fluviicola                         | 0           | 0           | 0           | 7,63737E-06 | 0           |
| Bacteria | Actinobacteria | Actinobacteria      | Actinomycetales    | Intrasporangiaceae              | Fodinibacter                       | 0           | 0           | 1,92724E-07 | 0           | 0           |

|          |                  |                     |                    |                                  |                  |             |             |             |             |             |
|----------|------------------|---------------------|--------------------|----------------------------------|------------------|-------------|-------------|-------------|-------------|-------------|
| Bacteria | Firmicutes       | Bacilli             | Bacillales         | Paenibacillaceae 1               | Fontibacillus    | 0           | 0           | 0           | 3,5401E-07  | 0           |
| Bacteria | Actinobacteria   | Actinobacteria      | Actinomycetales    | Propionibacteriaceae             | Friedmanniella   | 0           | 0           | 6,2513E-07  | 3,64645E-07 | 0           |
| Bacteria | Proteobacteria   | Gammaproteobacteria | Xanthomonadales    | Xanthomonadaceae                 | Fulvimonas       | 0           | 0           | 0           | 0           | 8,50838E-07 |
| Bacteria | Firmicutes       | Clostridia          | Clostridiales      | Clostridiales_Incertae Sedis XII | Fusibacter       | 1,4002E-05  | 5,64495E-06 | 7,98416E-06 | 3,66202E-06 | 0,000265393 |
| Bacteria | Fusobacteria     | Fusobacteriia       | Fusobacteriales    | Fusobacteriaceae                 | Fusobacterium    | 7,04847E-07 | 4,88868E-06 | 0,000452002 | 6,30609E-05 | 1,4036E-05  |
| Bacteria | Actinobacteria   | Actinobacteria      | Gaiellales         | Gaiellaceae                      | Gaiella          | 0           | 0           | 2,32654E-06 | 1,74562E-06 | 2,02595E-06 |
| Bacteria | Bacteroidetes    | Flavobacteriia      | Flavobacteriales   | Flavobacteriaceae                | Galbibacter      | 0           | 2,10778E-06 | 3,04917E-07 | 0           | 0           |
| Bacteria | Proteobacteria   | Gammaproteobacteria | Pasteurellales     | Pasteurellaceae                  | Gallibacterium   | 0           | 0           | 0           | 0           | 7,45147E-06 |
| Bacteria | Firmicutes       | Clostridia          | Clostridiales      | Clostridiales_Incertae Sedis XI  | Gallicola        | 0           | 0           | 5,44817E-07 | 0           | 0           |
| Bacteria | Actinobacteria   | Actinobacteria      | Bifidobacteriales  | Bifidobacteriaceae               | Gardnerella      | 0           | 0           | 0           | 0           | 4,3175E-07  |
| Bacteria | Bacteroidetes    | Flavobacteriia      | Flavobacteriales   | Flavobacteriaceae                | Gelidibacter     | 0           | 0           | 0           | 2,16547E-07 | 0           |
| Bacteria | Firmicutes       | Bacilli             | Bacillales         | Bacillales_Incertae Sedis XI     | Gemella          | 2,1233E-06  | 0           | 7,89213E-07 | 0           | 8,10378E-06 |
| Bacteria | Planctomycetes   | Planctomycetia      | Planctomycetales   | Planctomycetaceae                | Gemmata          | 0           | 0           | 7,94768E-07 | 0           | 4,38417E-06 |
| Bacteria | Gemmatimonadetes | Gemmatimonadetes    | Gemmatimonadales   | Gemmatimonadaceae                | Gemmatimonas     | 0           | 0           | 6,20688E-06 | 2,12386E-06 | 8,22341E-07 |
| Bacteria | Firmicutes       | Clostridia          | Clostridiales      | Ruminococcaceae                  | Gemmiger         | 0,001094628 | 0,002945363 | 0,000176864 | 0,003669146 | 9,31094E-05 |
| Bacteria | Proteobacteria   | Alphaproteobacteria | Rhodobacteriales   | Rhodobacteraceae                 | Gemmobacter      | 0           | 0           | 1,5026E-07  | 2,16547E-07 | 0           |
| Bacteria | Firmicutes       | Bacilli             | Bacillales         | Bacillaceae 1                    | Geobacillus      | 0           | 0           | 3,52987E-07 | 0           | 0           |
| Bacteria | Actinobacteria   | Actinobacteria      | Actinomycetales    | Geodermatophilaceae              | Geodermatophilus | 0           | 0           | 6,42088E-07 | 0           | 0           |
| Bacteria | Proteobacteria   | Deltaproteobacteria | Desulfuromonadales | Geobacteraceae                   | Geopsychrobacter | 0           | 0           | 1,15357E-06 | 0           | 0           |
| Bacteria | Actinobacteria   | Actinobacteria      | Actinomycetales    | Bogoriellaceae                   | Georgenia        | 0           | 0           | 6,67018E-07 | 0           | 0           |

|          |                           |                     |                   |                    |                   |             |             |             |             |             |
|----------|---------------------------|---------------------|-------------------|--------------------|-------------------|-------------|-------------|-------------|-------------|-------------|
| Bacteria | Firmicutes                | Clostridia          | Clostridiales     | Clostridiaceae 4   | Geosporobacter    | 0           | 0           | 1,76493E-07 | 0           | 0           |
| Bacteria | Proteobacteria            | Gammaproteobacteria | Enterobacteriales | Enterobacteriaceae | Gibbsiella        | 0           | 0           | 1,0548E-06  | 2,89771E-07 | 0           |
| Bacteria | Bacteroidetes             | Flavobacteriia      | Flavobacteriales  | Flavobacteriaceae  | Gillisia          | 7,04847E-07 | 0           | 0           | 1,33681E-06 | 0           |
| Bacteria | Firmicutes                | Bacilli             | Lactobacillales   | Aerococcaceae      | Globicatella      | 0           | 0           | 1,92724E-07 | 7,0802E-07  | 4,11171E-06 |
| Bacteria | Proteobacteria            | Alphaproteobacteria | Rhodospirillales  | Acetobacteraceae   | Gluconacetobacter | 0           | 0           | 1,23725E-06 | 0           | 0           |
| Bacteria | Proteobacteria            | Alphaproteobacteria | Rhodospirillales  | Acetobacteraceae   | Gluconobacter     | 0           | 0           | 9,88173E-06 | 0           | 0           |
| Bacteria | Actinobacteria            | Actinobacteria      | Actinomycetales   | Nocardiaceae       | Gordonia          | 0           | 0           | 2,24865E-06 | 0           | 2,71819E-05 |
| Bacteria | Actinobacteria            | Actinobacteria      | Coriobacteriales  | Coriobacteriaceae  | Gordonibacter     | 0,000460489 | 1,30262E-06 | 0,000138141 | 0,00039377  | 3,48302E-05 |
| Bacteria | Acidobacteria             | Acidobacteria_Gp1   | Gp1               | Gp1                | Gp1               | 0           | 0           | 9,37695E-07 | 0           | 0           |
| Bacteria | Acidobacteria             | Acidobacteria_Gp16  | Gp16              | Gp16               | Gp16              | 0           | 0           | 1,10742E-06 | 0           | 8,635E-07   |
| Bacteria | Acidobacteria             | Acidobacteria_Gp2   | Gp2               | Gp2                | Gp2               | 0           | 0           | 8,7086E-07  | 0           | 1,55733E-05 |
| Bacteria | Acidobacteria             | Acidobacteria_Gp3   | Gp3               | Gp3                | Gp3               | 0           | 0           | 9,698E-07   | 5,56336E-07 | 0           |
| Bacteria | Acidobacteria             | Acidobacteria_Gp4   | Gp4               | Gp4                | Gp4               | 6,51926E-06 | 0           | 2,17315E-06 | 8,46107E-07 | 0           |
| Bacteria | Acidobacteria             | Acidobacteria_Gp6   | Gp6               | Gp6                | Gp6               | 2,31227E-06 | 0           | 5,80644E-06 | 0           | 0           |
| Bacteria | Acidobacteria             | Acidobacteria_Gp7   | Gp7               | Gp7                | Gp7               | 0           | 0           | 7,53505E-07 | 4,50315E-07 | 0           |
| Bacteria | Cyanobacteria/Chloroplast | Cyanobacteria       | Family II         | Family II          | GpIIa             | 0           | 0           | 0           | 8,20773E-07 | 0           |
| Bacteria | Cyanobacteria/Chloroplast | Cyanobacteria       | Family XIII       | Family XIII        | GpXIII            | 0           | 0           | 1,56282E-07 | 4,33095E-07 | 0           |
| Bacteria | Firmicutes                | Clostridia          | Clostridiales     | Gracilibacteraceae | Gracilibacter     | 2,59603E-05 | 1,67093E-05 | 9,852E-06   | 9,28636E-05 | 1,32239E-06 |
| Bacteria | Firmicutes                | Bacilli             | Lactobacillales   | Carnobacteriaceae  | Granulicatella    | 2,85524E-06 | 0           | 1,66935E-07 | 0           | 7,31443E-06 |
| Bacteria | Acidobacteria             | Acidobacteria_Gp1   | Granulicella      | Granulicella       | Granulicella      | 0           | 0           | 0           | 5,78093E-07 | 0           |

|          |                |                       |                    |                                  |                          |             |             |             |             |             |
|----------|----------------|-----------------------|--------------------|----------------------------------|--------------------------|-------------|-------------|-------------|-------------|-------------|
| Bacteria | Firmicutes     | Clostridia            | Clostridiales      | Clostridiales_Incertae Sedis XII | Guggenheimella           | 0           | 0           | 3,25484E-06 | 5,19945E-06 | 2,46702E-06 |
| Bacteria | Proteobacteria | Gammaproteobacteria   | Pasteurellales     | Pasteurellaceae                  | Haemophilus              | 4,38971E-06 | 5,77586E-06 | 1,54534E-06 | 0           | 1,53906E-05 |
| Bacteria | Bacteroidetes  | Sphingobacteriia      | Sphingobacteriales | Saprospiraceae                   | Haliscomenobacter        | 0           | 0           | 0           | 9,70778E-07 | 0           |
| Bacteria | Bacteroidetes  | Bacteroidia           | Bacteroidales      | Prevotellaceae                   | Hallella                 | 0,000580152 | 0,003428908 | 0,002163944 | 0,001035796 | 0,001789438 |
| Bacteria | Firmicutes     | Bacilli               | Bacillales         | Bacillaceae 2                    | Halobacillus             | 0           | 0           | 1,27464E-07 | 0           | 0           |
| Bacteria | Tenericutes    | Mollicutes            | Haloplasmatales    | Haloplasmataceae                 | Haloplasma               | 0           | 0           | 0           | 0           | 1,25726E-06 |
| Bacteria | Proteobacteria | Alphaproteobacteria   | Rhizobiales        | Methylocystaceae                 | Hansschlegelia           | 0           | 0           | 0           | 5,56336E-07 | 0           |
| Bacteria | Actinobacteria | Actinobacteria        | Actinomycetales    | Dermabacteraceae                 | Helcobacillus            | 0           | 0           | 1,80215E-07 | 0           | 0           |
| Bacteria | Firmicutes     | Clostridia            | Clostridiales      | Clostridiales_Incertae Sedis XI  | Helcococcus              | 0           | 0           | 3,65559E-06 | 1,33681E-06 | 1,21019E-05 |
| Bacteria | Proteobacteria | Epsilonproteobacteria | Campylobacterales  | Helicobacteraceae                | Helicobacter             | 8,35086E-07 | 0,000307359 | 0,000204999 | 0,000685216 | 0           |
| Bacteria | Proteobacteria | Betaproteobacteria    | Burkholderiales    | Oxalobacteraceae                 | Herbaspirillum           | 7,38594E-07 | 0           | 0           | 0           | 0           |
| Bacteria | Firmicutes     | Clostridia            | Clostridiales      | Lachnospiraceae                  | Hespellia                | 8,0461E-06  | 5,03056E-06 | 1,39726E-05 | 1,29351E-05 | 5,76153E-06 |
| Bacteria | Firmicutes     | Erysipelotrichia      | Erysipelotrichales | Erysipelotrichaceae              | Holdemania               | 8,48859E-06 | 0,000207762 | 0,00312098  | 0,009195056 | 0,001775065 |
| Bacteria | Firmicutes     | Clostridia            | Clostridiales      | Lachnospiraceae                  | Howardella               | 0           | 0           | 1,14921E-05 | 1,73963E-06 | 3,09055E-06 |
| Bacteria | Proteobacteria | Epsilonproteobacteria | Campylobacterales  | Hydrogenimonaceae                | Hydrogenimonas           | 0           | 0           | 1,80215E-07 | 0           | 0           |
| Bacteria | Firmicutes     | Clostridia            | Clostridiales      | Ruminococcaceae                  | Hydrogenoanaerobacterium | 0,000507878 | 0,000317226 | 0,00053868  | 0,000140839 | 0,000334361 |
| Bacteria | Proteobacteria | Betaproteobacteria    | Burkholderiales    | Comamonadaceae                   | Hydrogenophaga           | 0           | 0           | 1,56282E-07 | 0           | 0           |
| Bacteria | Bacteroidetes  | Cytophagia            | Cytophagales       | Cytophagaceae                    | Hymenobacter             | 0           | 0           | 1,5851E-06  | 1,19764E-06 | 0           |
| Bacteria | Proteobacteria | Alphaproteobacteria   | Rhizobiales        | Hyphomicrobiaceae                | Hyphomicrobium           | 0           | 0           | 0           | 0           | 8,635E-07   |
| Bacteria | Actinobacteria | Actinobacteria        | Acidimicrobiales   | Iamiaceae                        | Iamia                    | 0           | 0           | 9,60051E-07 | 0           | 0           |

|                 |                       |                            |                           |                            |                          |                 |                 |                 |                 |                 |
|-----------------|-----------------------|----------------------------|---------------------------|----------------------------|--------------------------|-----------------|-----------------|-----------------|-----------------|-----------------|
| <i>Bacteria</i> | <i>Actinobacteria</i> | <i>Actinobacteria</i>      | <i>Acidimicrobiales</i>   | <i>Acidimicrobiaceae</i>   | <i>Ilumatobacter</i>     | 5,78067<br>E-06 | 0               | 5,82098<br>E-07 | 3,64645<br>E-07 | 1,46139E<br>-06 |
| <i>Bacteria</i> | <i>Proteobacteria</i> | <i>Alphaproteobacteria</i> | <i>Rhodospirillales</i>   | <i>Rhodospirillaceae</i>   | <i>Insolitospirillum</i> | 8,01297<br>E-05 | 0,0001523<br>12 | 4,55949<br>E-05 | 2,57674<br>E-05 | 0,000910<br>066 |
| <i>Bacteria</i> | <i>Firmicutes</i>     | <i>Bacilli</i>             | <i>Lactobacillales</i>    | <i>Carnobacteriaceae</i>   | <i>Isobaculum</i>        | 0               | 0               | 1,92029<br>E-07 | 0               | 4,62023E<br>-06 |
| <i>Bacteria</i> | <i>Proteobacteria</i> | <i>Betaproteobacteria</i>  | <i>Burkholderiales</i>    | <i>Oxalobacteraceae</i>    | <i>Janthinobacterium</i> | 0               | 0               | 0               | 2,16547<br>E-07 | 1,00009E<br>-06 |
| <i>Bacteria</i> | <i>Firmicutes</i>     | <i>Bacilli</i>             | <i>Bacillales</i>         | <i>Planococcaceae</i>      | <i>Jeotgalibacillus</i>  | 0               | 0               | 1,02325<br>E-06 | 9,208E-<br>06   | 0               |
| <i>Bacteria</i> | <i>Firmicutes</i>     | <i>Bacilli</i>             | <i>Bacillales</i>         | <i>Staphylococcaceae</i>   | <i>Jeotgalicoccus</i>    | 0               | 0               | 2,49322<br>E-07 | 0               | 4,38625E<br>-06 |
| <i>Bacteria</i> | <i>Synergistetes</i>  | <i>Synergistia</i>         | <i>Synergistales</i>      | <i>Synergistaceae</i>      | <i>Jonquetella</i>       | 0               | 1,36064E-<br>06 | 0               | 1,51567<br>E-06 | 0               |
| <i>Bacteria</i> | <i>Proteobacteria</i> | <i>Alphaproteobacteria</i> | <i>Rhizobiales</i>        | <i>Rhizobiaceae</i>        | <i>Kaistia</i>           | 0               | 1,30262E-<br>06 | 0               | 0               | 0               |
| <i>Bacteria</i> | <i>Firmicutes</i>     | <i>Erysipelotrichia</i>    | <i>Erysipelotrichales</i> | <i>Erysipelotrichaceae</i> | <i>Kandleria</i>         | 0               | 0               | 0,00053<br>0524 | 0,00021<br>5254 | 1,82418E<br>-05 |
| <i>Bacteria</i> | <i>Proteobacteria</i> | <i>Betaproteobacteria</i>  | <i>Burkholderiales</i>    | <i>Alcaligenaceae</i>      | <i>Kerstesia</i>         | 0               | 0               | 2,40417<br>E-06 | 4,70618<br>E-06 | 0               |
| <i>Bacteria</i> | <i>Proteobacteria</i> | <i>Alphaproteobacteria</i> | <i>Kiloniellales</i>      | <i>Kiloniellaceae</i>      | <i>Kiloniella</i>        | 0               | 0               | 0               | 2,20656<br>E-05 | 0               |
| <i>Bacteria</i> | <i>Actinobacteria</i> | <i>Actinobacteria</i>      | <i>Actinomycetales</i>    | <i>Kineosporiaceae</i>     | <i>Kineococcus</i>       | 0               | 0               | 7,3838E<br>-07  | 5,56336<br>E-07 | 0               |
| <i>Bacteria</i> | <i>Actinobacteria</i> | <i>Actinobacteria</i>      | <i>Actinomycetales</i>    | <i>Kineosporiaceae</i>     | <i>Kineosporia</i>       | 0               | 0               | 0               | 6,2012E<br>-07  | 0               |
| <i>Bacteria</i> | <i>Proteobacteria</i> | <i>Betaproteobacteria</i>  | <i>Neisseriales</i>       | <i>Neisseriaceae</i>       | <i>Kingella</i>          | 0               | 0               | 1,09398<br>E-06 | 1,25333<br>E-06 | 0               |
| <i>Bacteria</i> | <i>Proteobacteria</i> | <i>Betaproteobacteria</i>  | <i>Burkholderiales</i>    | <i>Comamonadaceae</i>      | <i>Kinneretia</i>        | 0               | 0               | 0               | 0               | 8,38176E<br>-07 |
| <i>Bacteria</i> | <i>Proteobacteria</i> | <i>Gammaproteobacteria</i> | <i>Enterobacteriales</i>  | <i>Enterobacteriaceae</i>  | <i>Klebsiella</i>        | 0               | 0               | 0,00020<br>0718 | 2,90311<br>E-05 | 0               |
| <i>Bacteria</i> | <i>Actinobacteria</i> | <i>Actinobacteria</i>      | <i>Actinomycetales</i>    | <i>Micrococcaceae</i>      | <i>Kocuria</i>           | 0               | 0               | 3,69217<br>E-07 | 1,08274<br>E-06 | 1,16245E<br>-06 |
| <i>Bacteria</i> | <i>Proteobacteria</i> | <i>Deltaproteobacteria</i> | <i>Myxococcales</i>       | <i>Kofleriaceae</i>        | <i>Kofleria</i>          | 0               | 0               | 3,12565<br>E-07 | 0               | 0               |
| <i>Bacteria</i> | <i>Proteobacteria</i> | <i>Gammaproteobacteria</i> | <i>Enterobacteriales</i>  | <i>Enterobacteriaceae</i>  | <i>Kosakonia</i>         | 0               | 0               | 2,32439<br>E-06 | 0               | 9,18743E<br>-06 |
| <i>Bacteria</i> | <i>Actinobacteria</i> | <i>Actinobacteria</i>      | <i>Actinomycetales</i>    | <i>Nocardioideaceae</i>    | <i>Kribbella</i>         | 0               | 0               | 0               | 2,89771<br>E-07 | 0               |

|                 |                       |                            |                           |                            |                                       |             |             |             |             |             |
|-----------------|-----------------------|----------------------------|---------------------------|----------------------------|---------------------------------------|-------------|-------------|-------------|-------------|-------------|
| <i>Bacteria</i> | <i>Firmicutes</i>     | <i>Bacilli</i>             | <i>Bacillales</i>         | <i>Planococcaceae</i>      | <i>Kurthia</i>                        | 0           | 2,72128E-06 | 3,18267E-05 | 3,0813E-06  | 2,59548E-06 |
| <i>Bacteria</i> | <i>Proteobacteria</i> | <i>Alphaproteobacteria</i> | <i>Rhizobiales</i>        | <i>Xanthobacteraceae</i>   | <i>Labrys</i>                         | 0           | 0           | 3,6043E-07  | 4,02996E-07 | 0           |
| <i>Bacteria</i> | <i>Firmicutes</i>     | <i>Clostridia</i>          | <i>Clostridiales</i>      | <i>Lachnospiraceae</i>     | <i>Lachnoanaerobaculum</i>            | 0,000225738 | 0,000202376 | 0,000156694 | 9,78319E-05 | 9,64775E-05 |
| <i>Bacteria</i> | <i>Firmicutes</i>     | <i>Clostridia</i>          | <i>Clostridiales</i>      | <i>Lachnospiraceae</i>     | <i>Lachnobacterium</i>                | 2,92063E-06 | 7,4032E-06  | 1,53938E-06 | 2,89878E-05 | 4,71505E-06 |
| <i>Bacteria</i> | <i>Firmicutes</i>     | <i>Clostridia</i>          | <i>Clostridiales</i>      | <i>Lachnospiraceae</i>     | <i>Lachnospira</i>                    | 3,06258E-05 | 5,58094E-05 | 1,31516E-05 | 5,02513E-05 | 5,73935E-05 |
| <i>Bacteria</i> | <i>Firmicutes</i>     | <i>Clostridia</i>          | <i>Clostridiales</i>      | <i>Lachnospiraceae</i>     | <i>Lachnospiraceae_incertae_sedis</i> | 0,027238906 | 0,037117376 | 0,04302749  | 0,019216133 | 0,022422667 |
| <i>Bacteria</i> | <i>Firmicutes</i>     | <i>Bacilli</i>             | <i>Lactobacillales</i>    | <i>Lactobacillaceae</i>    | <i>Lactobacillus</i>                  | 5,3964E-05  | 0,004839212 | 0,012037922 | 0,000620451 | 0,000450592 |
| <i>Bacteria</i> | <i>Firmicutes</i>     | <i>Bacilli</i>             | <i>Lactobacillales</i>    | <i>Streptococcaceae</i>    | <i>Lactococcus</i>                    | 1,06165E-06 | 0           | 7,25384E-06 | 3,5401E-07  | 0           |
| <i>Bacteria</i> | <i>Firmicutes</i>     | <i>Clostridia</i>          | <i>Clostridiales</i>      | <i>Lachnospiraceae</i>     | <i>Lactonifactor</i>                  | 4,27439E-05 | 7,05285E-05 | 0,000117616 | 9,44071E-05 | 2,52434E-05 |
| <i>Bacteria</i> | <i>Firmicutes</i>     | <i>Bacilli</i>             | <i>Lactobacillales</i>    | <i>Streptococcaceae</i>    | <i>Lactovum</i>                       | 0           | 1,92362E-06 | 1,3919E-06  | 2,78601E-06 | 2,47217E-06 |
| <i>Bacteria</i> | <i>Proteobacteria</i> | <i>Deltaproteobacteria</i> | <i>Desulfovibrionales</i> | <i>Desulfovibrionaceae</i> | <i>Lawsonia</i>                       | 0           | 0           | 0           | 4,17777E-07 | 0           |
| <i>Bacteria</i> | <i>Proteobacteria</i> | <i>Gammaproteobacteria</i> | <i>Enterobacteriales</i>  | <i>Enterobacteriaceae</i>  | <i>Leclercia</i>                      | 0           | 0           | 8,82715E-06 | 2,16547E-07 | 0           |
| <i>Bacteria</i> | <i>Proteobacteria</i> | <i>Gammaproteobacteria</i> | <i>Legionellales</i>      | <i>Legionellaceae</i>      | <i>Legionella</i>                     | 0           | 1,30262E-06 | 4,31831E-07 | 0           | 0           |
| <i>Bacteria</i> | <i>Actinobacteria</i> | <i>Actinobacteria</i>      | <i>Actinomycetales</i>    | <i>Microbacteriaceae</i>   | <i>Leifsonia</i>                      | 0           | 0           | 0           | 4,50315E-07 | 0           |
| <i>Bacteria</i> | <i>Proteobacteria</i> | <i>Gammaproteobacteria</i> | <i>Enterobacteriales</i>  | <i>Enterobacteriaceae</i>  | <i>Lelliottia</i>                     | 0           | 0           | 2,49322E-07 | 0           | 0           |
| <i>Bacteria</i> | <i>Fusobacteria</i>   | <i>Fusobacteriia</i>       | <i>Fusobacteriales</i>    | <i>Leptotrichiaceae</i>    | <i>Leptotrichia</i>                   | 1,06266E-06 | 2,10778E-06 | 3,90107E-07 | 0           | 0           |
| <i>Bacteria</i> | <i>Actinobacteria</i> | <i>Actinobacteria</i>      | <i>Actinomycetales</i>    | <i>Microbacteriaceae</i>   | <i>Leucobacter</i>                    | 0           | 0           | 3,07926E-06 | 0           | 0           |
| <i>Bacteria</i> | <i>Firmicutes</i>     | <i>Bacilli</i>             | <i>Lactobacillales</i>    | <i>Leuconostocaceae</i>    | <i>Leuconostoc</i>                    | 0           | 3,82742E-06 | 3,92192E-06 | 0           | 0           |
| <i>Bacteria</i> | <i>Proteobacteria</i> | <i>Betaproteobacteria</i>  | <i>Burkholderiales</i>    | <i>Burkholderiaceae</i>    | <i>Limnobacter</i>                    | 0           | 1,14513E-06 | 3,11916E-06 | 0           | 0           |
| <i>Bacteria</i> | <i>Chloroflexi</i>    | <i>Caldilineae</i>         | <i>Caldilineales</i>      | <i>Caldilineaceae</i>      | <i>Litorilinea</i>                    | 4,62453E-06 | 0           | 0           | 0           | 0           |

|          |                     |                               |                    |                     |                  |             |             |             |             |             |
|----------|---------------------|-------------------------------|--------------------|---------------------|------------------|-------------|-------------|-------------|-------------|-------------|
| Bacteria | Bacteroidetes       | Flavobacteriia                | Flavobacteriales   | Flavobacteriaceae   | Lutaonella       | 0           | 0           | 1,92724E-07 | 0           | 2,00018E-06 |
| Bacteria | Proteobacteria      | Gammaproteobacteria           | Xanthomonadales    | Xanthomonadaceae    | Luteimonas       | 0           | 0           | 6,18539E-07 | 1,51583E-06 | 2,93361E-06 |
| Bacteria | Verrucomicrobia     | Verrucomicrobiae              | Verrucomicrobiales | Verrucomicrobiaceae | Luteolibacter    | 0           | 0           | 2,49322E-07 | 2,16547E-07 | 0           |
| Bacteria | Firmicutes          | Clostridia                    | Clostridiales      | Gracilibacteraceae  | Lutispora        | 0,000632364 | 0,000528761 | 0,000511156 | 1,2221E-06  | 0,001658782 |
| Bacteria | Firmicutes          | Bacilli                       | Bacillales         | Planococcaceae      | Lysinibacillus   | 6,72584E-06 | 0,000174203 | 0,001958194 | 0,001460519 | 0,000377528 |
| Bacteria | Proteobacteria      | Gammaproteobacteria           | Xanthomonadales    | Xanthomonadaceae    | Lysobacter       | 0           | 0           | 2,41604E-06 | 7,9464E-07  | 0           |
| Bacteria | Firmicutes          | Bacilli                       | Bacillales         | Staphylococcaceae   | Macrococcus      | 0           | 0           | 1,26613E-06 | 0           | 0           |
| Bacteria | Proteobacteria      | Betaproteobacteria            | Burkholderiales    | Comamonadaceae      | Macromonas       | 0           | 0           | 0           | 9,70778E-07 | 0           |
| Bacteria | Proteobacteria      | Alphaproteobacteria           | Rhodospirillales   | Rhodospirillaceae   | Magnetospirillum | 0           | 0           | 8,35085E-07 | 0           | 2,19209E-06 |
| Bacteria | Bacteroidetes       | Bacteroidia                   | Bacteroidales      | Marinilabiliaceae   | Mangroviflexus   | 0           | 0           | 0           | 4,70618E-07 | 1,7192E-05  |
| Bacteria | Bacteroidetes       | Bacteroidetes"_incertae_sedis | Marinifilum        | Marinifilum         | Marinifilum      | 0           | 0           | 0           | 0           | 4,3175E-07  |
| Bacteria | Actinobacteria      | Actinobacteria                | Actinomycetales    | Nocardoidaceae      | Marmoricola      | 4,62453E-06 | 0           | 4,08185E-06 | 1,7576E-06  | 0           |
| Bacteria | Firmicutes          | Clostridia                    | Clostridiales      | Lachnospiraceae     | Marvinbryantia   | 0           | 9,62643E-07 | 3,68667E-06 | 1,41604E-06 | 4,3175E-07  |
| Bacteria | Proteobacteria      | Betaproteobacteria            | Burkholderiales    | Oxalobacteraceae    | Massilia         | 0           | 2,88793E-06 | 2,01687E-06 | 2,83424E-06 | 3,37168E-06 |
| Bacteria | Firmicutes          | Negativicutes                 | Selenomonadales    | Veillonellaceae     | Megamonas        | 0           | 0           | 2,38598E-06 | 0           | 4,70771E-05 |
| Bacteria | Firmicutes          | Negativicutes                 | Selenomonadales    | Veillonellaceae     | Megasphaera      | 4,54875E-05 | 0,000325454 | 0,004780706 | 0,000500667 | 9,90526E-06 |
| Bacteria | Deinococcus-Thermus | Deinococci                    | Thermales          | Thermaceae          | Meiothermus      | 0           | 0           | 0           | 0           | 2,15875E-06 |
| Bacteria | Proteobacteria      | Deltaproteobacteria           | Myxococcales       | Cystobacteraceae    | Melittangium     | 0           | 0           | 0           | 5,79542E-07 | 0           |
| Bacteria | Bacteroidetes       | Cytophagia                    | Cytophagales       | Cytophagaceae       | Meniscus         | 1,36934E-06 | 1,07943E-06 | 2,63812E-06 | 3,76789E-05 | 4,19088E-07 |
| Bacteria | Proteobacteria      | Alphaproteobacteria           | Rhizobiales        | Phyllobacteriaceae  | Mesorhizobium    | 0           | 0           | 1,0597E-06  | 1,66107E-06 | 7,30943E-06 |



|          |                 |                     |                    |                                   |                    |             |             |             |             |             |
|----------|-----------------|---------------------|--------------------|-----------------------------------|--------------------|-------------|-------------|-------------|-------------|-------------|
| Archaea  | Euryarchaeota   | Methanobacteria     | Methanobacteriales | Methanobacteriaceae               | Methanobrevibacter | 0           | 0,001601267 | 0,00532259  | 0,000189169 | 1,30821E-05 |
| Archaea  | Euryarchaeota   | Methanobacteria     | Methanobacteriales | Methanobacteriaceae               | Methanosphaera     | 0           | 0,000208958 | 7,67577E-07 | 3,03151E-05 | 0           |
| Bacteria | Proteobacteria  | Betaproteobacteria  | Burkholderiales    | Burkholderiales_incertae_sedis    | Methylibium        | 0           | 0           | 1,29333E-06 | 0           | 0           |
| Bacteria | Proteobacteria  | Alphaproteobacteria | Rhizobiales        | Methylobacteriaceae               | Methylobacterium   | 0           | 0           | 1,78684E-05 | 2,36234E-06 | 5,06704E-06 |
| Bacteria | Proteobacteria  | Alphaproteobacteria | Rhizobiales        | Methylocystaceae                  | Methylocystis      | 0           | 0           | 4,59573E-07 | 0           | 0           |
| Bacteria | Proteobacteria  | Betaproteobacteria  | Methylophilales    | Methylophilaceae                  | Methylophilus      | 0           | 0           | 7,74293E-06 | 0           | 0           |
| Bacteria | Proteobacteria  | Alphaproteobacteria | Rhizobiales        | Beijerinckiaceae                  | Methylorosula      | 0           | 0           | 1,56282E-07 | 0           | 0           |
| Bacteria | Actinobacteria  | Actinobacteria      | Actinomycetales    | Microbacteriaceae                 | Microbacterium     | 1,82634E-06 | 1,17934E-06 | 5,71616E-06 | 2,82371E-06 | 3,42868E-06 |
| Bacteria | Actinobacteria  | Actinobacteria      | Actinomycetales    | Microbacteriaceae                 | Microcella         | 0           | 1,30262E-06 | 3,32594E-06 | 1,15175E-06 | 0           |
| Bacteria | Actinobacteria  | Actinobacteria      | Actinomycetales    | Micrococcaceae                    | Micrococcus        | 4,98125E-06 | 2,14198E-06 | 2,56681E-05 | 1,27858E-06 | 2,59695E-05 |
| Bacteria | Proteobacteria  | Alphaproteobacteria | Rhizobiales        | Methylobacteriaceae               | Microvirga         | 0           | 0           | 3,27279E-06 | 0           | 4,19088E-07 |
| Bacteria | Actinobacteria  | Actinobacteria      | Actinomycetales    | Nocardiaceae                      | Millisia           | 0           | 0           | 1,72201E-06 | 0           | 0           |
| Bacteria | Actinobacteria  | Actinobacteria      | Actinomycetales    | Beutenbergiaceae                  | Miniimonas         | 0           | 0           | 1,92724E-07 | 0           | 0           |
| Bacteria | Firmicutes      | Negativicutes       | Selenomonadales    | Veillonellaceae                   | Mitsuokella        | 6,8467E-07  | 0,000955482 | 0,003174335 | 0,000325221 | 0           |
| Bacteria | Actinobacteria  | Actinobacteria      | Actinomycetales    | Actinomycetaceae                  | Mobiluncus         | 0           | 0           | 2,41536E-06 | 1,56383E-06 | 4,19088E-07 |
| Bacteria | Actinobacteria  | Actinobacteria      | Actinomycetales    | Geodermatophilaceae               | Modestobacter      | 0           | 0           | 0           | 2,16547E-07 | 8,635E-07   |
| Bacteria | Firmicutes      | Clostridia          | Clostridiales      | Clostridiales_Incertae_Sedis_XIII | Mogibacterium      | 4,84839E-05 | 9,73031E-05 | 0,000136971 | 5,84953E-05 | 0,00014638  |
| Bacteria | Bacteroidetes   | Flavobacteriia      | Flavobacteriales   | Flavobacteriaceae                 | Moheibacter        | 0           | 0           | 0           | 4,33095E-07 | 0           |
| Bacteria | Firmicutes      | Clostridia          | Clostridiales      | Lachnospiraceae                   | Moryella           | 0           | 0           | 5,08833E-07 | 0           | 0           |
| Bacteria | Deferribacteres | Deferribacteres     | Deferribacterales  | Deferribacteraceae                | Mucispirillum      | 0           | 5,59831E-05 | 5,09107E-05 | 0,000582846 | 0           |

|                 |                       |                            |                           |                            |                        |                 |             |                 |                 |                 |
|-----------------|-----------------------|----------------------------|---------------------------|----------------------------|------------------------|-----------------|-------------|-----------------|-----------------|-----------------|
| <i>Bacteria</i> | <i>Firmicutes</i>     | <i>Clostridia</i>          | <i>Clostridiales</i>      | <i>Incertae Sedis XI</i>   | <i>Murdochiella</i>    | 0               | 0           | 1,98276<br>E-06 | 3,33417<br>E-06 | 0               |
| <i>Bacteria</i> | <i>Actinobacteria</i> | <i>Actinobacteria</i>      | <i>Actinomycetales</i>    | <i>Microbacteriaceae</i>   | <i>Mycetocola</i>      | 0               | 0           | 0               | 4,17777<br>E-07 | 0               |
| <i>Bacteria</i> | <i>Actinobacteria</i> | <i>Actinobacteria</i>      | <i>Actinomycetales</i>    | <i>Mycobacteriaceae</i>    | <i>Mycobacterium</i>   | 0               | 0           | 3,02927<br>E-06 | 6,09384<br>E-06 | 1,64468E-06     |
| <i>Bacteria</i> | <i>Tenericutes</i>    | <i>Mollicutes</i>          | <i>Mycoplasmatales</i>    | <i>Mycoplasmataceae</i>    | <i>Mycoplasma</i>      | 7,38594<br>E-07 | 0           | 5,80791<br>E-05 | 7,10103<br>E-05 | 0,000388<br>092 |
| <i>Bacteria</i> | <i>Actinobacteria</i> | <i>Actinobacteria</i>      | <i>Actinomycetales</i>    | <i>Nakamurellaceae</i>     | <i>Nakamurella</i>     | 0               | 0           | 4,67221<br>E-07 | 4,02996<br>E-07 | 4,3175E-07      |
| <i>Bacteria</i> | <i>Firmicutes</i>     | <i>Clostridia</i>          | <i>Clostridiales</i>      | <i>Natranaerovirga</i>     | <i>Natranaerovirga</i> | 0               | 0           | 1,22257<br>E-06 | 3,23593<br>E-07 | 8,635E-07       |
| <i>Bacteria</i> | <i>Proteobacteria</i> | <i>Betaproteobacteria</i>  | <i>Burkholderiales</i>    | <i>Oxalobacteraceae</i>    | <i>Naxibacter</i>      | 0               | 0           | 5,21164<br>E-07 | 0               | 0               |
| <i>Bacteria</i> | <i>Firmicutes</i>     | <i>Negativicutes</i>       | <i>Selenomonadales</i>    | <i>Veillonellaceae</i>     | <i>Negativicoccus</i>  | 5,3893E-06      | 0           | 0               | 0               | 0               |
| <i>Bacteria</i> | <i>Proteobacteria</i> | <i>Betaproteobacteria</i>  | <i>Neisseriales</i>       | <i>Neisseriaceae</i>       | <i>Neisseria</i>       | 2,80998<br>E-06 | 3,32911E-06 | 0,00016<br>9436 | 5,88337<br>E-06 | 4,6173E-05      |
| <i>Bacteria</i> | <i>Chlamydiae</i>     | <i>Chlamydiia</i>          | <i>Chlamydiales</i>       | <i>Parachlamydiaceae</i>   | <i>Neochlamydia</i>    | 0               | 0           | 5,32654<br>E-07 | 0               | 0               |
| <i>Bacteria</i> | <i>Actinobacteria</i> | <i>Actinobacteria</i>      | <i>Actinomycetales</i>    | <i>Micrococcaceae</i>      | <i>Nesterenkonia</i>   | 0               | 0           | 8,85156<br>E-07 | 6,49642<br>E-07 | 1,24143E-06     |
| <i>Bacteria</i> | <i>Proteobacteria</i> | <i>Gammaproteobacteria</i> | <i>Pasteurellales</i>     | <i>Pasteurellaceae</i>     | <i>Nicoletella</i>     | 0               | 0           | 0               | 0               | 8,95084E-06     |
| <i>Bacteria</i> | <i>Nitrospirae</i>    | <i>Nitrospira</i>          | <i>Nitrospirales</i>      | <i>Nitrospiraceae</i>      | <i>Nitrospira</i>      | 0               | 0           | 2,1459E-06      | 0               | 0               |
| <i>Bacteria</i> | <i>Actinobacteria</i> | <i>Actinobacteria</i>      | <i>Actinomycetales</i>    | <i>Nocardioidaceae</i>     | <i>Nocardioides</i>    | 1,15613<br>E-06 | 0           | 7,41419<br>E-06 | 3,70531<br>E-06 | 0               |
| <i>Bacteria</i> | <i>Firmicutes</i>     | <i>Bacilli</i>             | <i>Bacillales</i>         | <i>Staphylococcaceae</i>   | <i>Nosocomiicoccus</i> | 0               | 0           | 0               | 0               | 5,00045E-07     |
| <i>Bacteria</i> | <i>Proteobacteria</i> | <i>Alphaproteobacteria</i> | <i>Sphingomonadales</i>   | <i>Sphingomonadaceae</i>   | <i>Novosphingobium</i> | 3,4684E-06      | 0           | 3,85009<br>E-06 | 1,05016<br>E-06 | 4,72121E-06     |
| <i>Bacteria</i> | <i>Bacteroidetes</i>  | <i>Sphingobacteriia</i>    | <i>Sphingobacteriales</i> | <i>Sphingobacteriaceae</i> | <i>Nubsella</i>        | 0               | 0           | 0               | 0               | 4,80731E-06     |
| <i>Bacteria</i> | <i>Firmicutes</i>     | <i>Bacilli</i>             | <i>Bacillales</i>         | <i>Bacillaceae 2</i>       | <i>Oceanobacillus</i>  | 0               | 0           | 0               | 2,16547<br>E-07 | 0               |
| <i>Bacteria</i> | <i>Proteobacteria</i> | <i>Alphaproteobacteria</i> | <i>Rhizobiales</i>        | <i>Brucellaceae</i>        | <i>Ochrobactrum</i>    | 8,20734<br>E-06 | 1,07943E-06 | 3,99582<br>E-07 | 4,03688<br>E-06 | 6,30366E-06     |
| <i>Bacteria</i> | <i>Bacteroidetes</i>  | <i>Bacteroidia</i>         | <i>Bacteroidales</i>      | <i>Porphyromonadaceae</i>  | <i>Odoribacter</i>     | 0               | 0           | 1,36659<br>E-06 | 0               | 3,36188E-05     |

|          |                 |                               |                   |                    |                    |             |             |             |             |             |
|----------|-----------------|-------------------------------|-------------------|--------------------|--------------------|-------------|-------------|-------------|-------------|-------------|
| Bacteria | Bacteroidetes   | Bacteroidetes"_incertae_sedis | Ohtaekwangia      | Ohtaekwangia       | Ohtaekwangia       | 2,31227E-06 | 0           | 1,05189E-06 | 0           | 0           |
| Bacteria | Actinobacteria  | Actinobacteria                | Actinomycetales   | Microbacteriaceae  | Okibacterium       | 0           | 0           | 0           | 0           | 2,00018E-06 |
| Bacteria | Proteobacteria  | Betaproteobacteria            | Burkholderiales   | Alcaligenaceae     | Oligella           | 0           | 0           | 6,2513E-07  | 0           | 2,92278E-06 |
| Bacteria | Lentisphaerae   | Oligosphaeria                 | Oligosphaerales   | Oligosphaeraceae   | Oligosphaera       | 0           | 5,69725E-06 | 2,11151E-06 | 2,77339E-06 | 0           |
| Bacteria | Actinobacteria  | Actinobacteria                | Coriobacteriales  | Coriobacteriaceae  | Olsenella          | 0,000152091 | 3,62157E-05 | 0,000351396 | 8,65292E-05 | 5,46609E-05 |
| Bacteria | Verrucomicrobia | Opitutae                      | Opitiales         | Opitutaceae        | Opitutus           | 1,15613E-06 | 0           | 5,78172E-07 | 0           | 1,00009E-06 |
| Bacteria | Firmicutes      | Clostridia                    | Clostridiales     | Lachnospiraceae    | Oribacterium       | 0           | 0,000506462 | 0,000663296 | 0,005912754 | 0,000606877 |
| Bacteria | Actinobacteria  | Actinobacteria                | Actinomycetales   | Intrasporangiaceae | Ornithiniccoccus   | 0           | 0           | 0           | 0           | 1,64468E-06 |
| Bacteria | Actinobacteria  | Actinobacteria                | Actinomycetales   | Intrasporangiaceae | Ornithinimicrobium | 2,31227E-06 | 0           | 0,000134128 | 1,01119E-06 | 1,727E-06   |
| Bacteria | Bacteroidetes   | Flavobacteriia                | Flavobacteriales  | Flavobacteriaceae  | Ornithobacterium   | 1,36934E-06 | 0,001895087 | 0,003260714 | 7,18769E-05 | 0,00706337  |
| Bacteria | Firmicutes      | Clostridia                    | Clostridiales     | Ruminococcaceae    | Oscillibacter      | 0,046339027 | 0,032909507 | 0,02158873  | 0,009584477 | 0,006200557 |
| Bacteria | Proteobacteria  | Gammaproteobacteria           | Pasteurellales    | Pasteurellaceae    | Otariodibacter     | 0           | 0           | 0           | 6,77603E-07 | 0           |
| Bacteria | Bacteroidetes   | Flavobacteriia                | Flavobacteriales  | Cryomorphaceae     | Owenweeksia        | 0           | 0           | 0           | 3,32093E-06 | 0           |
| Bacteria | Proteobacteria  | Betaproteobacteria            | Burkholderiales   | Oxalobacteraceae   | Oxalicibacterium   | 0           | 0           | 1,56282E-07 | 0           | 0           |
| Bacteria | Proteobacteria  | Betaproteobacteria            | Burkholderiales   | Oxalobacteraceae   | Oxalobacter        | 2,05401E-06 | 0,001337466 | 0,001264246 | 0,001195954 | 1,24143E-06 |
| Bacteria | Firmicutes      | Bacilli                       | Bacillales        | Paenibacillaceae 2 | Oxalophagus        | 0           | 1,36064E-06 | 2,49322E-07 | 0           | 0           |
| Bacteria | Firmicutes      | Bacilli                       | Bacillales        | Paenibacillaceae 1 | Paenibacillus      | 0           | 0           | 1,06982E-06 | 2,17747E-05 | 0           |
| Bacteria | Firmicutes      | Bacilli                       | Bacillales        | Planococcaceae     | Paenisporosarcina  | 0           | 0           | 0           | 6,06333E-06 | 0           |
| Bacteria | Proteobacteria  | Gammaproteobacteria           | Enterobacteriales | Enterobacteriaceae | Pantoea            | 0           | 0           | 1,5026E-07  | 0           | 1,46139E-06 |
| Bacteria | Firmicutes      | Clostridia                    | Clostridiales     | Ruminococcaceae    | Papillibacter      | 0,002439223 | 0,000960806 | 0,004550016 | 0,00039259  | 0,002213555 |

|                 |                       |                                            |                                            |                                            |                                            |                 |                 |                 |                 |                 |
|-----------------|-----------------------|--------------------------------------------|--------------------------------------------|--------------------------------------------|--------------------------------------------|-----------------|-----------------|-----------------|-----------------|-----------------|
| <i>Bacteria</i> | <i>Bacteroidetes</i>  | <i>Bacteroidia</i>                         | <i>Bacteroidales</i>                       | <i>Porphyromonadaceae</i>                  | <i>Parabacteroides</i>                     | 0,00539<br>5332 | 0,0043886<br>71 | 0,00143<br>434  | 0,00015<br>6735 | 0,003166<br>421 |
| <i>Bacteria</i> | <i>Chlamydiae</i>     | <i>Chlamydiia</i>                          | <i>Chlamydiales</i>                        | <i>Parachlamydiaceae</i>                   | <i>Parachlamydia</i>                       | 0               | 0               | 1,68908<br>E-06 | 0               | 1,25726E<br>-06 |
| <i>Bacteria</i> | <i>Proteobacteria</i> | <i>Alphaproteobacteria</i>                 | <i>Rhodobacterales</i>                     | <i>Rhodobacteraceae</i>                    | <i>Paracoccus</i>                          | 4,30156<br>E-06 | 1,30262E-<br>06 | 1,169E-<br>05   | 6,66863<br>E-07 | 7,65925E<br>-06 |
| <i>Bacteria</i> | <i>Actinobacteria</i> | <i>Actinobacteria</i>                      | <i>Coriobacteriales</i>                    | <i>Coriobacteriaceae</i>                   | <i>Paraeggerthella</i>                     | 0               | 1,56077E-<br>05 | 3,21033<br>E-05 | 1,58223<br>E-05 | 0               |
| <i>Bacteria</i> | <i>Firmicutes</i>     | <i>Bacilli</i>                             | <i>Lactobacillales</i>                     | <i>Lactobacillaceae</i>                    | <i>Paralactobacillus</i>                   | 1,15613<br>E-06 | 4,96498E-<br>05 | 0,00010<br>6256 | 4,70618<br>E-07 | 0               |
| <i>Bacteria</i> | <i>Bacteroidetes</i>  | <i>Sphingobacteriia</i>                    | <i>Sphingobacteriales</i>                  | <i>Sphingobacteriaceae</i>                 | <i>Parapedobacter</i>                      | 0               | 0               | 7,03925<br>E-07 | 0               | 1,46139E<br>-06 |
| <i>Bacteria</i> | <i>Bacteroidetes</i>  | <i>Bacteroidia</i>                         | <i>Bacteroidales</i>                       | <i>Prevotellaceae</i>                      | <i>Paraprevotella</i>                      | 0,01186<br>8633 | 0,0111421<br>06 | 0,00716<br>48   | 0,03032<br>8039 | 0,016493<br>814 |
| <i>Bacteria</i> | <i>Bacteroidetes</i>  | <i>Sphingobacteriia</i>                    | <i>Sphingobacteriales</i>                  | <i>Chitinophagaceae</i>                    | <i>Parasegetibacter</i>                    | 0               | 0               | 0               | 9,00631<br>E-06 | 1,29525E<br>-06 |
| <i>Bacteria</i> | <i>Firmicutes</i>     | <i>Clostridia</i>                          | <i>Clostridiales</i>                       | <i>Lachnospiraceae</i>                     | <i>Parasporobacterium</i>                  | 3,79669<br>E-05 | 2,32361E-<br>05 | 3,58116<br>E-05 | 1,87918<br>E-05 | 5,70204E<br>-06 |
| <i>Bacteria</i> | <i>Proteobacteria</i> | <i>Betaproteobacteria</i>                  | <i>Burkholderiales</i>                     | <i>Sutterellaceae</i>                      | <i>Parasutterella</i>                      | 0,00142<br>9451 | 6,51723E-<br>05 | 1,21803<br>E-05 | 2,50666<br>E-06 | 2,15206E<br>-05 |
| <i>Bacteria</i> | <i>Parcubacteria</i>  | <i>Parcubacteria_genera_incertae_sedis</i> | <i>Parcubacteria_genera_incertae_sedis</i> | <i>Parcubacteria_genera_incertae_sedis</i> | <i>Parcubacteria_genera_incertae_sedis</i> | 0               | 0               | 6,24915<br>E-07 | 4,02996<br>E-07 | 5,61184E<br>-06 |
| <i>Bacteria</i> | <i>Firmicutes</i>     | <i>Clostridia</i>                          | <i>Clostridiales</i>                       | <i>Clostridiales_Incertae_Sedis_XI</i>     | <i>Parvimonas</i>                          | 0               | 0               | 3,2444E<br>-06  | 0               | 0               |
| <i>Bacteria</i> | <i>Proteobacteria</i> | <i>Gammaproteobacteria</i>                 | <i>Pasteurellales</i>                      | <i>Pasteurellaceae</i>                     | <i>Pasteurella</i>                         | 0               | 0               | 2,99959<br>E-05 | 3,46845<br>E-06 | 2,08464E<br>-05 |
| <i>Bacteria</i> | <i>Actinobacteria</i> | <i>Actinobacteria</i>                      | <i>Solirubrobacterales</i>                 | <i>Patulibacteraceae</i>                   | <i>Patulibacter</i>                        | 0               | 0               | 0               | 6,2012E<br>-07  | 0               |
| <i>Bacteria</i> | <i>Firmicutes</i>     | <i>Bacilli</i>                             | <i>Bacillales</i>                          | <i>Bacillaceae 2</i>                       | <i>Paucislibacillus</i>                    | 0               | 0               | 1,76493<br>E-07 | 2,16547<br>E-07 | 0               |
| <i>Bacteria</i> | <i>Firmicutes</i>     | <i>Bacilli</i>                             | <i>Lactobacillales</i>                     | <i>Lactobacillaceae</i>                    | <i>Pediococcus</i>                         | 0               | 2,3673E-<br>06  | 2,8157E<br>-07  | 0               | 2,5905E-<br>06  |
| <i>Bacteria</i> | <i>Bacteroidetes</i>  | <i>Sphingobacteriia</i>                    | <i>Sphingobacteriales</i>                  | <i>Sphingobacteriaceae</i>                 | <i>Pedobacter</i>                          | 0               | 0               | 0               | 6,49642<br>E-07 | 0               |
| <i>Bacteria</i> | <i>Proteobacteria</i> | <i>Alphaproteobacteria</i>                 | <i>Rhizobiales</i>                         | <i>Hyphomicrobiaceae</i>                   | <i>Pedomicrobium</i>                       | 0               | 0               | 5,61887<br>E-07 | 0               | 5,00045E<br>-07 |
| <i>Bacteria</i> | <i>Proteobacteria</i> | <i>Alphaproteobacteria</i>                 | <i>Rhizobiales</i>                         | <i>Hyphomicrobiaceae</i>                   | <i>Pelagibacterium</i>                     | 0               | 0               | 1,40785<br>E-07 | 0               | 0               |

|          |                |                     |                   |                                 |                                      |             |             |             |             |             |
|----------|----------------|---------------------|-------------------|---------------------------------|--------------------------------------|-------------|-------------|-------------|-------------|-------------|
| Bacteria | Proteobacteria | Betaproteobacteria  | Burkholderiales   | Alcaligenaceae                  | Pelistega                            | 0           | 0           | 3,39678E-06 | 0           | 2,65414E-05 |
| Bacteria | Proteobacteria | Betaproteobacteria  | Burkholderiales   | Comamonadaceae                  | Pelomonas                            | 2,95738E-06 | 2,44434E-06 | 7,3337E-07  | 0           | 1,70561E-05 |
| Bacteria | Firmicutes     | Clostridia          | Clostridiales     | Syntrophomonadaceae             | Pelospora                            | 1,35932E-05 | 4,54903E-06 | 3,14114E-05 | 2,7973E-05  | 1,92161E-05 |
| Bacteria | Firmicutes     | Clostridia          | Clostridiales     | Peptococcaceae 1                | Peptococcus                          | 0,000225542 | 0,000130471 | 0,000535722 | 0,000390157 | 0,001385708 |
| Bacteria | Firmicutes     | Clostridia          | Clostridiales     | Clostridiales_Incertae_Sedis XI | Peptoniphilus                        | 3,46841E-06 | 6,52626E-06 | 2,20799E-06 | 1,44077E-06 | 4,3175E-07  |
| Bacteria | Firmicutes     | Clostridia          | Clostridiales     | Peptostreptococcaceae           | Peptostreptococcaceae_incertae_sedis | 0           | 0           | 1,80215E-07 | 0           | 0           |
| Bacteria | Firmicutes     | Clostridia          | Clostridiales     | Peptostreptococcaceae           | Peptostreptococcus                   | 0           | 0           | 4,40675E-06 | 6,33659E-06 | 0           |
| Bacteria | Proteobacteria | Deltaproteobacteria | Bdellovibrionales | Bacteriovoracaceae              | Peredibacter                         | 0           | 0           | 1,66935E-07 | 0           | 0           |
| Bacteria | Proteobacteria | Alphaproteobacteria | Rhodospirillales  | Rhodospirillaceae               | Phaeovibrio                          | 0           | 0           | 0           | 0           | 1,55304E-06 |
| Bacteria | Firmicutes     | Negativicutes       | Selenomonadales   | Acidaminococcaceae              | Phascolarctobacterium                | 0,010622926 | 0,032554284 | 0,0165529   | 0,049107779 | 0,004919848 |
| Bacteria | Proteobacteria | Deltaproteobacteria | Myxococcales      | Phaselicytidaceae               | Phaselicystis                        | 0           | 0           | 1,29646E-06 | 0           | 0           |
| Bacteria | Proteobacteria | Alphaproteobacteria | Caulobacterales   | Caulobacteraceae                | Phenyllobacterium                    | 0           | 0           | 5,96312E-07 | 0           | 1,54673E-05 |
| Bacteria | Bacteroidetes  | Bacteroidia         | Bacteroidales     | Bacteroidales"_incertae_sedis   | Phocaeicola                          | 0           | 0           | 1,12067E-06 | 6,37546E-05 | 0           |
| Bacteria | Actinobacteria | Actinobacteria      | Actinomycetales   | Intrasporangiaceae              | Phycococcus                          | 0           | 0           | 3,34871E-07 | 0           | 2,15875E-06 |
| Bacteria | Proteobacteria | Betaproteobacteria  | Burkholderiales   | Alcaligenaceae                  | Pigmentiphaga                        | 0           | 0           | 0           | 1,0521E-06  | 0           |
| Bacteria | Firmicutes     | Bacilli             | Lactobacillales   | Enterococcaceae                 | Pilibacter                           | 6,8467E-07  | 1,49798E-05 | 1,92029E-07 | 0           | 0           |
| Bacteria | Planctomycetes | Planctomycetia      | Planctomycetales  | Planctomycetaceae               | Pirellula                            | 0           | 0           | 6,35107E-07 | 1,56705E-05 | 8,50838E-07 |
| Bacteria | Planctomycetes | Planctomycetia      | Planctomycetales  | Planctomycetaceae               | Planctomyces                         | 0           | 0           | 2,38872E-06 | 4,70618E-07 | 0           |
| Bacteria | Bacteroidetes  | Flavobacteriia      | Flavobacteriales  | Flavobacteriaceae               | Planobacterium                       | 0           | 0           | 3,62381E-06 | 1,61796E-06 | 0           |

|          |                |                                   |                   |                           |                                   |                 |                 |                 |                 |                 |
|----------|----------------|-----------------------------------|-------------------|---------------------------|-----------------------------------|-----------------|-----------------|-----------------|-----------------|-----------------|
| Bacteria | Firmicutes     | Bacilli                           | Bacillales        | Planococcaceae            | Planococcaceae_<br>incertae_sedis | 0               | 0,0001173<br>28 | 0,00045<br>1764 | 0,00090<br>1557 | 6,94775E<br>-05 |
| Bacteria | Firmicutes     | Bacilli                           | Bacillales        | Planococcaceae            | Planococcus                       | 0               | 0               | 1,40785<br>E-07 | 6,49642<br>E-07 | 0               |
| Bacteria | Firmicutes     | Bacilli                           | Bacillales        | Planococcaceae            | Planomicrobium                    | 0               | 0               | 2,5833E<br>-06  | 6,71297<br>E-06 | 8,22341E<br>-06 |
| Bacteria | Proteobacteria | Gammaproteobacteria               | Enterobacteriales | Enterobacteriaceae        | Pluralibacter                     | 0               | 0               | 2,34959<br>E-06 | 0               | 0               |
| Bacteria | Proteobacteria | Betaproteobacteria                | Burkholderiales   | Burkholderiaceae          | Polynucleobacter                  | 0               | 0               | 0               | 1,41186<br>E-06 | 0               |
| Bacteria | Firmicutes     | Bacilli                           | Bacillales        | Bacillaceae 2             | Pontibacillus                     | 0               | 0               | 4,35274<br>E-06 | 5,43065<br>E-06 | 1,75731E<br>-06 |
| Bacteria | Bacteroidetes  | Cytophagia                        | Cytophagales      | Cytophagaceae             | Pontibacter                       | 0               | 0               | 1,05896<br>E-06 | 4,50315<br>E-07 | 1,50014E<br>-06 |
| Bacteria | Proteobacteria | Alphaproteobacteria               | Caulobacterales   | Hyphomonadaceae           | Ponticaulis                       | 0               | 0               | 0               | 3,47728<br>E-07 | 0               |
| Bacteria | Proteobacteria | Alphaproteobacteria               | Sphingomonadales  | Erythrobacteraceae        | Porphyrobacter                    | 1,15613<br>E-06 | 0               | 0               | 1,29928<br>E-06 | 8,635E-<br>07   |
| Bacteria | Bacteroidetes  | Bacteroidia                       | Bacteroidales     | Porphyromonadaceae        | Porphyromonas                     | 0               | 0               | 0,00017<br>2284 | 0,00024<br>3151 | 1,30425E<br>-05 |
| Bacteria | Bacteroidetes  | Bacteroidia                       | Bacteroidales     | Prevotellaceae            | Prevotella                        | 0,16021<br>4152 | 0,1510314<br>22 | 0,09891<br>2159 | 0,10080<br>9421 | 0,073382<br>862 |
| Bacteria | Bacteroidetes  | Bacteroidetes"_<br>incertae_sedis | Prolixibacter     | Prolixibacter             | Prolixibacter                     | 0               | 1,4956E-<br>05  | 4,60037<br>E-06 | 1,47076<br>E-05 | 0               |
| Bacteria | Actinobacteria | Actinobacteria                    | Actinomycetales   | Promicromonosporacea<br>e | Promicromonosp<br>ora             | 0               | 0               | 0               | 3,47728<br>E-07 | 0               |
| Bacteria | Actinobacteria | Actinobacteria                    | Actinomycetales   | Propionibacteriaceae      | Propionibacteriu<br>m             | 2,57095<br>E-05 | 2,4028E-<br>05  | 6,17395<br>E-06 | 3,04602<br>E-05 | 8,08753E<br>-05 |
| Bacteria | Actinobacteria | Actinobacteria                    | Actinomycetales   | Propionibacteriaceae      | Propionicimonas                   | 0               | 0               | 1,76228<br>E-05 | 0               | 0               |
| Bacteria | Fusobacteria   | Fusobacteriia                     | Fusobacteriales   | Fusobacteriaceae          | Propionigenium                    | 0               | 0               | 0               | 1,12532<br>E-06 | 0               |
| Bacteria | Firmicutes     | Negativicutes                     | Selenomonadales   | Veillonellaceae           | Propionispira                     | 8,35086<br>E-07 | 0               | 0               | 0               | 0               |
| Bacteria | Firmicutes     | Clostridia                        | Clostridiales     | Clostridiaceae 1          | Proteiniclasticu<br>m             | 1,15613<br>E-06 | 0               | 7,98767<br>E-07 | 1,24024<br>E-06 | 0               |
| Bacteria | Proteobacteria | Gammaproteobacteria               | Enterobacteriales | Enterobacteriaceae        | Proteus                           | 0               | 0               | 3,6043E<br>-07  | 0               | 0               |
| Bacteria | Proteobacteria | Deltaproteobacteria               | Myxococcales      | Nannocystaceae            | Pseudenhygromy<br>xa              | 0               | 0               | 1,27464<br>E-07 | 0               | 0               |

|          |                |                     |                    |                     |                            |                 |                 |                 |                 |                 |
|----------|----------------|---------------------|--------------------|---------------------|----------------------------|-----------------|-----------------|-----------------|-----------------|-----------------|
| Bacteria | Firmicutes     | Clostridia          | Clostridiales      | Lachnospiraceae     | Pseudobutyrvibr<br>io      | 0,00241<br>6588 | 0,0020373<br>05 | 0,00311<br>1477 | 0,00607<br>3297 | 0,001234<br>327 |
| Bacteria | Proteobacteria | Alphaproteobacteria | Rhizobiales        | Brucellaceae        | Pseudochroactr<br>um       | 0               | 0               | 7,60094<br>E-07 | 0               | 0               |
| Bacteria | Firmicutes     | Clostridia          | Clostridiales      | Ruminococcaceae     | Pseudoflavonifra<br>ctor   | 0,00118<br>9221 | 0,0005840<br>21 | 0,00182<br>829  | 0,00025<br>9868 | 0,000393<br>78  |
| Bacteria | Proteobacteria | Alphaproteobacteria | Rhizobiales        | Xanthobacteraceae   | Pseudolabrys               | 0               | 0               | 6,5546E<br>-07  | 0               | 0               |
| Bacteria | Proteobacteria | Gammaproteobacteria | Pseudomonadales    | Pseudomonadaceae    | Pseudomonas                | 3,8817E<br>-06  | 4,92833E-<br>06 | 5,04033<br>E-06 | 2,18081<br>E-05 | 2,80583E<br>-05 |
| Bacteria | Actinobacteria | Actinobacteria      | Actinomycetales    | Pseudonocardiaceae  | Pseudonocardia             | 0               | 0               | 1,54097<br>E-06 | 0               | 0               |
| Bacteria | Firmicutes     | Clostridia          | Clostridiales      | Eubacteriaceae      | Pseudoramibacte<br>r       | 0               | 0               | 3,01381<br>E-06 | 0               | 0               |
| Bacteria | Bacteroidetes  | Sphingobacteriia    | Sphingobacteriales | Sphingobacteriaceae | Pseudosphingob<br>acterium | 6,8467E<br>-07  | 0,0001008<br>91 | 4,02944<br>E-05 | 1,24192<br>E-05 | 0               |
| Bacteria | Proteobacteria | Gammaproteobacteria | Xanthomonadales    | Xanthomonadaceae    | Pseudoxanthomo<br>nas      | 0               | 0               | 2,49322<br>E-07 | 0               | 0               |
| Bacteria | Firmicutes     | Bacilli             | Bacillales         | Planococcaceae      | Psychrobacillus            | 0               | 3,80498E-<br>06 | 9,74464<br>E-06 | 1,38383<br>E-05 | 1,71434E<br>-06 |
| Bacteria | Proteobacteria | Gammaproteobacteria | Pseudomonadales    | Moraxellaceae       | Psychrobacter              | 0               | 0               | 6,06416<br>E-06 | 1,29928<br>E-06 | 5,59621E<br>-05 |
| Bacteria | Firmicutes     | Negativicutes       | Selenomonadales    | Veillonellaceae     | Psychrosinus               | 0               | 9,61809E-<br>07 | 0               | 0               | 0               |
| Bacteria | Proteobacteria | Betaproteobacteria  | Burkholderiales    | Alcaligenaceae      | Pusillimonas               | 0               | 0               | 6,4447E<br>-07  | 0               | 0               |
| Bacteria | Synergistetes  | Synergistia         | Synergistales      | Synergistaceae      | Pyramidobacter             | 6,8467E<br>-07  | 0,0007767<br>05 | 2,57951<br>E-05 | 0,00059<br>5541 | 0,001765<br>256 |
| Bacteria | Actinobacteria | Actinobacteria      | Actinomycetales    | Kineosporiaceae     | Quadrisphaera              | 0               | 0               | 1,3714E<br>-06  | 0               | 0               |
| Bacteria | Proteobacteria | Betaproteobacteria  | Burkholderiales    | Burkholderiaceae    | Ralstonia                  | 0               | 0               | 5,24138<br>E-06 | 0               | 1,91397E<br>-05 |
| Bacteria | Proteobacteria | Betaproteobacteria  | Burkholderiales    | Comamonadaceae      | Ramlibacter                | 0               | 0               | 1,56282<br>E-07 | 0               | 0               |
| Bacteria | Proteobacteria | Gammaproteobacteria | Enterobacteriales  | Enterobacteriaceae  | Raoultella                 | 0               | 0               | 9,20301<br>E-07 | 3,64645<br>E-07 | 0               |
| Bacteria | Actinobacteria | Actinobacteria      | Actinomycetales    | Microbacteriaceae   | Rathayibacter              | 8,35086<br>E-07 | 0               | 1,67884<br>E-06 | 6,66863<br>E-07 | 1,06904E<br>-05 |
| Bacteria | Actinobacteria | Actinobacteria      | Actinomycetales    | Micrococcaceae      | Renibacterium              | 1,86098<br>E-06 | 0               | 3,52987<br>E-07 | 0               | 1,727E-<br>06   |

|                 |                       |                            |                                                |                            |                              |                 |                 |                 |                 |                 |
|-----------------|-----------------------|----------------------------|------------------------------------------------|----------------------------|------------------------------|-----------------|-----------------|-----------------|-----------------|-----------------|
| <i>Bacteria</i> | <i>Proteobacteria</i> | <i>Alphaproteobacteria</i> | <i>Rhizobiales</i>                             | <i>Rhizobiaceae</i>        | <i>Rhizobium</i>             | 5,31328<br>E-06 | 2,38205E-<br>06 | 2,58125<br>E-05 | 6,63572<br>E-06 | 9,31254E<br>-06 |
| <i>Bacteria</i> | <i>Proteobacteria</i> | <i>Alphaproteobacteria</i> | <i>Alphaproteobacteria<br/>_incertae_sedis</i> | <i>Rhizomicrobium</i>      | <i>Rhizomicrobium</i>        | 0               | 0               | 5,83041<br>E-07 | 0               | 8,38176E<br>-07 |
| <i>Bacteria</i> | <i>Proteobacteria</i> | <i>Alphaproteobacteria</i> | <i>Rhodobacterales</i>                         | <i>Rhodobacteraceae</i>    | <i>Rhodobacter</i>           | 0               | 0               | 1,80215<br>E-07 | 0               | 0               |
| <i>Bacteria</i> | <i>Proteobacteria</i> | <i>Alphaproteobacteria</i> | <i>Rhodospirillales</i>                        | <i>Rhodospirillaceae</i>   | <i>Rhodocista</i>            | 0               | 0               | 0               | 0               | 7,30695E<br>-07 |
| <i>Bacteria</i> | <i>Actinobacteria</i> | <i>Actinobacteria</i>      | <i>Actinomycetales</i>                         | <i>Nocardiaceae</i>        | <i>Rhodococcus</i>           | 2,12431<br>E-06 | 1,14513E-<br>06 | 4,40306<br>E-06 | 0               | 5,80542E<br>-06 |
| <i>Bacteria</i> | <i>Proteobacteria</i> | <i>Alphaproteobacteria</i> | <i>Rhizobiales</i>                             | <i>Rhodobiaceae</i>        | <i>Rhodoligotropho<br/>s</i> | 0               | 0               | 1,56282<br>E-07 | 0               | 0               |
| <i>Bacteria</i> | <i>Planctomycetes</i> | <i>Planctomycetia</i>      | <i>Planctomycetales</i>                        | <i>Planctomycetaceae</i>   | <i>Rhodopirellula</i>        | 2,31227<br>E-06 | 0               | 6,6027E<br>-07  | 0               | 0               |
| <i>Bacteria</i> | <i>Proteobacteria</i> | <i>Alphaproteobacteria</i> | <i>Rhizobiales</i>                             | <i>Bradyrhizobiaceae</i>   | <i>Rhodopseudomo<br/>nas</i> | 0               | 0               | 1,40785<br>E-07 | 0               | 7,30695E<br>-07 |
| <i>Bacteria</i> | <i>Bacteroidetes</i>  | <i>Bacteroidia</i>         | <i>Bacteroidales</i>                           | <i>Rikenellaceae</i>       | <i>Rikenella</i>             | 4,83626<br>E-06 | 0               | 3,68772<br>E-07 | 0               | 0               |
| <i>Bacteria</i> | <i>Firmicutes</i>     | <i>Clostridia</i>          | <i>Clostridiales</i>                           | <i>Lachnospiraceae</i>     | <i>Robinsoniella</i>         | 0,00012<br>7883 | 0,0001700<br>83 | 0,00024<br>9852 | 0,00020<br>7358 | 8,70955E<br>-05 |
| <i>Bacteria</i> | <i>Firmicutes</i>     | <i>Clostridia</i>          | <i>Clostridiales</i>                           | <i>Lachnospiraceae</i>     | <i>Roseburia</i>             | 0,02546<br>087  | 0,0111953<br>29 | 0,00537<br>7641 | 0,03547<br>226  | 0,013954<br>853 |
| <i>Bacteria</i> | <i>Chloroflexi</i>    | <i>Chloroflexia</i>        | <i>Chloroflexales</i>                          | <i>Chloroflexaceae</i>     | <i>Roseiflexus</i>           | 0               | 0               | 3,52987<br>E-07 | 0               | 4,3175E-<br>07  |
| <i>Bacteria</i> | <i>Proteobacteria</i> | <i>Alphaproteobacteria</i> | <i>Rhodospirillales</i>                        | <i>Acetobacteraceae</i>    | <i>Roseococcus</i>           | 0               | 0               | 4,63968<br>E-07 | 0               | 0               |
| <i>Bacteria</i> | <i>Proteobacteria</i> | <i>Alphaproteobacteria</i> | <i>Rhodospirillales</i>                        | <i>Acetobacteraceae</i>    | <i>Roseomonas</i>            | 2,24478<br>E-06 | 1,22217E-<br>06 | 1,48982<br>E-06 | 4,33095<br>E-07 | 0               |
| <i>Bacteria</i> | <i>Actinobacteria</i> | <i>Actinobacteria</i>      | <i>Actinomycetales</i>                         | <i>Micrococcaceae</i>      | <i>Rothia</i>                | 7,30624<br>E-06 | 3,06875E-<br>06 | 4,64971<br>E-06 | 7,81229<br>E-05 | 1,38854E<br>-05 |
| <i>Bacteria</i> | <i>Proteobacteria</i> | <i>Alphaproteobacteria</i> | <i>Rhodobacterales</i>                         | <i>Rhodobacteraceae</i>    | <i>Rubellimicrobiu<br/>m</i> | 0               | 0               | 1,32614<br>E-06 | 0               | 0               |
| <i>Bacteria</i> | <i>Actinobacteria</i> | <i>Actinobacteria</i>      | <i>Rubrobacterales</i>                         | <i>Rubrobacteraceae</i>    | <i>Rubrobacter</i>           | 1,08774<br>E-06 | 1,30262E-<br>06 | 1,61254<br>E-06 | 3,3313E<br>-06  | 1,84938E<br>-05 |
| <i>Bacteria</i> | <i>Proteobacteria</i> | <i>Gammaproteobacteria</i> | <i>Aeromonadales</i>                           | <i>Succinivibrionaceae</i> | <i>Ruminobacter</i>          | 8,35086<br>E-07 | 4,11475E-<br>05 | 4,9597E<br>-05  | 1,17028<br>E-05 | 0,000983<br>056 |
| <i>Bacteria</i> | <i>Firmicutes</i>     | <i>Clostridia</i>          | <i>Clostridiales</i>                           | <i>Ruminococcaceae</i>     | <i>Ruminococcus</i>          | 0,03843<br>0075 | 0,0232398<br>13 | 0,01332<br>0976 | 0,01884<br>9797 | 0,043513<br>43  |
| <i>Bacteria</i> | <i>Firmicutes</i>     | <i>Clostridia</i>          | <i>Clostridiales</i>                           | <i>Lachnospiraceae</i>     | <i>Ruminococcus2</i>         | 0,00642<br>9844 | 0,0015594<br>96 | 0,00159<br>7831 | 0,00106<br>1375 | 0,000830<br>592 |



|          |                                |                                        |                                        |                                        |                                        |                 |                 |                 |                 |                 |
|----------|--------------------------------|----------------------------------------|----------------------------------------|----------------------------------------|----------------------------------------|-----------------|-----------------|-----------------|-----------------|-----------------|
| Bacteria | Firmicutes                     | Bacilli                                | Bacillales                             | Planococcaceae                         | Rummeliibacillus                       | 2,21879<br>E-06 | 0,0132308<br>5  | 0,00111<br>0872 | 1,64701<br>E-06 | 0               |
| Bacteria | Candidatus<br>Saccharibacteria | Saccharibacteria_genera_incertae_sedis | Saccharibacteria_genera_incertae_sedis | Saccharibacteria_genera_incertae_sedis | Saccharibacteria_genera_incertae_sedis | 1,99122<br>E-06 | 7,69525E-<br>05 | 0,00053<br>016  | 0,00220<br>4092 | 0,000102<br>494 |
| Bacteria | Firmicutes                     | Clostridia                             | Clostridiales                          | Ruminococcaceae                        | Saccharofermentans                     | 7,74183<br>E-05 | 8,2906E-<br>05  | 0,00027<br>8311 | 0,01244<br>7607 | 7,41021E<br>-06 |
| Bacteria | Bacteroidetes                  | Sphingobacteriia                       | Sphingobacteriales                     | Rhodothermaceae                        | Salinibacter                           | 1,15613<br>E-06 | 0               | 0               | 0               | 0               |
| Bacteria | Actinobacteria                 | Actinobacteria                         | Actinomycetales                        | Microbacteriaceae                      | Salinibacterium                        | 0               | 9,61809E-<br>07 | 0               | 0               | 0               |
| Bacteria | Bacteroidetes                  | Flavobacteriia                         | Flavobacteriales                       | Flavobacteriaceae                      | Salinimicrobium                        | 0               | 0               | 0               | 8,66189<br>E-07 | 1,00009E<br>-06 |
| Bacteria | Firmicutes                     | Bacilli                                | Bacillales                             | Bacillaceae 2                          | Salirhabdus                            | 0               | 0               | 1,76493<br>E-07 | 0               | 0               |
| Bacteria | Proteobacteria                 | Alphaproteobacteria                    | Sphingomonadales                       | Sphingomonadaceae                      | Sandarakinorhabdus                     | 0               | 0               | 0               | 4,33095<br>E-07 | 0               |
| Bacteria | Actinobacteria                 | Actinobacteria                         | Actinomycetales                        | Sanguibacteraceae                      | Sanguibacter                           | 0               | 0               | 0               | 9,00631<br>E-07 | 0               |
| Bacteria | Firmicutes                     | Clostridia                             | Clostridiales                          | Clostridiaceae 1                       | Sarcina                                | 9,11237<br>E-06 | 1,93673E-<br>05 | 0,00012<br>0091 | 2,10898<br>E-05 | 5,59336E<br>-05 |
| Bacteria | Planctomycetes                 | Planctomycetia                         | Planctomycetales                       | Planctomycetaceae                      | Schlesneria                            | 0               | 1,22217E-<br>06 | 8,62017<br>E-07 | 1,56896<br>E-05 | 0               |
| Bacteria | Firmicutes                     | Negativicutes                          | Selenomonadales                        | Veillonellaceae                        | Schwartzia                             | 0               | 0,0001405<br>37 | 0,00041<br>2857 | 0,00103<br>94   | 0               |
| Bacteria | Firmicutes                     | Clostridia                             | Clostridiales                          | Clostridiales_Incertae_Sedis XI        | Sedimentibacter                        | 0               | 0               | 0,00011<br>5639 | 0               | 0               |
| Bacteria | Bacteroidetes                  | Sphingobacteriia                       | Sphingobacteriales                     | Chitinophagaceae                       | Sediminibacterium                      | 0               | 0               | 2,8873E<br>-06  | 5,79542<br>E-07 | 2,46169E<br>-05 |
| Bacteria | Firmicutes                     | Negativicutes                          | Selenomonadales                        | Veillonellaceae                        | Selenomonas                            | 0               | 0,0002070<br>74 | 0,00119<br>2356 | 0,00136<br>7257 | 2,5905E-<br>06  |
| Bacteria | Proteobacteria                 | Gammaproteobacteria                    | Pseudomonadales                        | Pseudomonadaceae                       | Serpens                                | 0               | 0               | 3,4467E<br>-07  | 0               | 1,46139E<br>-06 |
| Bacteria | Firmicutes                     | Erysipelotrichia                       | Erysipelotrichales                     | Erysipelotrichaceae                    | Sharpea                                | 0               | 2,60525E-<br>06 | 0,00085<br>3838 | 2,30087<br>E-06 | 5,02533E<br>-05 |
| Bacteria | Proteobacteria                 | Gammaproteobacteria                    | Alteromonadales                        | Shewanellaceae                         | Shewanella                             | 0               | 0               | 0               | 8,35554<br>E-07 | 0               |
| Bacteria | Proteobacteria                 | Betaproteobacteria                     | Rhodocyclales                          | Rhodocyclaceae                         | Shinella                               | 0               | 0               | 3,00521<br>E-07 | 0               | 8,635E-<br>07   |

|          |                 |                     |                                      |                                      |                                      |             |             |             |             |             |
|----------|-----------------|---------------------|--------------------------------------|--------------------------------------|--------------------------------------|-------------|-------------|-------------|-------------|-------------|
| Bacteria | Firmicutes      | Clostridia          | Clostridiales                        | Lachnospiraceae                      | Shuttleworthia                       | 1,89674E-06 | 2,88793E-06 | 1,27151E-05 | 9,7943E-06  | 0           |
| Bacteria | Proteobacteria  | Betaproteobacteria  | Neisseriales                         | Neisseriaceae                        | Simonsiella                          | 0           | 0           | 0           | 0           | 8,635E-07   |
| Bacteria | Planctomycetes  | Planctomycetia      | Planctomycetales                     | Planctomycetaceae                    | Singulisphaera                       | 0           | 0           | 3,09312E-07 | 0           | 0           |
| Bacteria | Actinobacteria  | Actinobacteria      | Actinomycetales                      | Micrococcaceae                       | Sinomonas                            | 0           | 0           | 1,76493E-07 | 2,70477E-05 | 0           |
| Bacteria | Actinobacteria  | Actinobacteria      | Coriobacteriales                     | Coriobacteriaceae                    | Slackia                              | 0           | 2,31304E-05 | 0,000103075 | 4,79966E-05 | 1,13966E-05 |
| Bacteria | Firmicutes      | Bacilli             | Bacillales                           | Planococcaceae                       | Solibacillus                         | 0           | 5,16562E-06 | 0,000849774 | 0,00101013  | 0,001126393 |
| Bacteria | Actinobacteria  | Actinobacteria      | Solirubrobacterales                  | Solirubrobacteraceae                 | Solirubrobacter                      | 0           | 0           | 2,42555E-06 | 1,13443E-06 | 0           |
| Bacteria | Bacteroidetes   | Sphingobacteriia    | Sphingobacteriales                   | Sphingobacteriaceae                  | Solitaea                             | 0           | 0           | 0           | 5,56507E-06 | 0           |
| Bacteria | Firmicutes      | Erysipelotrichia    | Erysipelotrichales                   | Erysipelotrichaceae                  | Solobacterium                        | 0           | 0           | 1,44352E-06 | 0           | 0           |
| Bacteria | Bacteroidetes   | Flavobacteriia      | Flavobacteriales                     | Flavobacteriaceae                    | Soonwooa                             | 1,75639E-06 | 9,62643E-07 | 0           | 0           | 0           |
| Bacteria | Verrucomicrobia | Spartobacteria      | Spartobacteria_genera_incertae_sedis | Spartobacteria_genera_incertae_sedis | Spartobacteria_genera_incertae_sedis | 2,31227E-06 | 0           | 2,32559E-06 | 4,0574E-06  | 1,32809E-05 |
| Bacteria | Chloroflexi     | Thermomicrobia      | Sphaerobacterales                    | Sphaerobacteraceae                   | Sphaerobacter                        | 3,4684E-06  | 0           | 1,36342E-05 | 2,16547E-07 | 0           |
| Bacteria | Spirochaetes    | Spirochaetia        | Spirochaetales                       | Spirochaetaceae                      | Sphaerochaeta                        | 1,36934E-06 | 0,005501647 | 0,001161582 | 0,002757896 | 0,010555532 |
| Bacteria | Bacteroidetes   | Sphingobacteriia    | Sphingobacteriales                   | Sphingobacteriaceae                  | Sphingobacterium                     | 1,06266E-06 | 0           | 1,35642E-06 | 5,80459E-06 | 1,727E-06   |
| Bacteria | Proteobacteria  | Alphaproteobacteria | Sphingomonadales                     | Sphingomonadaceae                    | Sphingobium                          | 0           | 0           | 1,46451E-06 | 5,56336E-07 | 1,50014E-06 |
| Bacteria | Proteobacteria  | Alphaproteobacteria | Sphingomonadales                     | Sphingomonadaceae                    | Sphingomonas                         | 1,15613E-06 | 2,66326E-06 | 3,01419E-05 | 0,000104352 | 2,81119E-05 |
| Bacteria | Proteobacteria  | Alphaproteobacteria | Sphingomonadales                     | Sphingomonadaceae                    | Sphingopyxis                         | 0           | 0           | 1,13042E-06 | 0           | 0           |
| Bacteria | Proteobacteria  | Alphaproteobacteria | Sphingomonadales                     | Sphingomonadaceae                    | Sphingorhabdus                       | 0           | 0           | 0           | 2,16547E-07 | 0           |
| Bacteria | Proteobacteria  | Alphaproteobacteria | Sphingomonadales                     | Sphingomonadaceae                    | Sphingosinicella                     | 0           | 0           | 3,12565E-07 | 1,15619E-06 | 0           |

|          |                           |                           |                                    |                                    |                                    |             |             |             |             |             |
|----------|---------------------------|---------------------------|------------------------------------|------------------------------------|------------------------------------|-------------|-------------|-------------|-------------|-------------|
| Bacteria | Bacteroidetes             | Cytophagia                | Cytophagales                       | Cytophagaceae                      | Spirosoma                          | 0           | 0           | 0           | 6,49642E-07 | 0           |
| Bacteria | Firmicutes                | Clostridia                | Clostridiales                      | Peptostreptococcaceae              | Sporacetigenium                    | 2,30344E-05 | 4,9932E-06  | 1,61579E-05 | 2,63989E-05 | 2,36155E-05 |
| Bacteria | Actinobacteria            | Actinobacteria            | Actinomycetales                    | Sporichthyaceae                    | Sporichthya                        | 0           | 0           | 1,27464E-07 | 0           | 0           |
| Bacteria | Firmicutes                | Clostridia                | Clostridiales                      | Ruminococcaceae                    | Sporobacter                        | 0,005770222 | 0,004631174 | 0,00623628  | 0,003717772 | 0,004484292 |
| Bacteria | Firmicutes                | Clostridia                | Clostridiales                      | Lachnospiraceae                    | Sporobacterium                     | 0           | 0           | 0           | 0           | 4,3175E-07  |
| Bacteria | SR1                       | SR1_genera_incertae_sedis | SR1_genera_incertae_sedis          | SR1_genera_incertae_sedis          | SR1_genera_incertae_sedis          | 0           | 0           | 1,41073E-05 | 0,0004425   | 0           |
| Bacteria | Firmicutes                | Bacilli                   | Bacillales                         | Staphylococcaceae                  | Staphylococcus                     | 1,95708E-05 | 1,56933E-05 | 8,61121E-06 | 0,000158163 | 7,28502E-05 |
| Bacteria | Proteobacteria            | Alphaproteobacteria       | Rhodospirillales                   | Acetobacteraceae                   | Stella                             | 0           | 0           | 2,97068E-07 | 0           | 0           |
| Bacteria | Proteobacteria            | Gammaproteobacteria       | Xanthomonadales                    | Xanthomonadaceae                   | Stenotrophomonas                   | 0           | 3,40957E-06 | 4,1528E-06  | 1,12805E-05 | 8,22341E-07 |
| Bacteria | Proteobacteria            | Gammaproteobacteria       | Xanthomonadales                    | Sinobacteraceae                    | Steroidobacter                     | 0           | 9,61809E-07 | 3,52987E-07 | 0           | 0           |
| Bacteria | Actinobacteria            | Actinobacteria            | Actinomycetales                    | Streptomycetaceae                  | Streptomyces                       | 0           | 0           | 3,52987E-07 | 1,22773E-06 | 0           |
| Bacteria | Cyanobacteria/Chloroplast | Chloroplast               | Chloroplast                        | Chloroplast                        | Streptophyta                       | 1,77241E-06 | 9,1343E-06  | 0,00132072  | 3,62511E-05 | 3,20122E-05 |
| Bacteria | Verrucomicrobia           | Subdivision3              | Subdivision3_genera_incertae_sedis | Subdivision3_genera_incertae_sedis | Subdivision3_genera_incertae_sedis | 0           | 1,14513E-06 | 7,81412E-07 | 0           | 0           |
| Bacteria | Verrucomicrobia           | Subdivision5              | Subdivision5_genera_incertae_sedis | Subdivision5_genera_incertae_sedis | Subdivision5_genera_incertae_sedis | 1,38952E-06 | 0,006002729 | 0,004541873 | 0,020351255 | 0,001349141 |
| Bacteria | Firmicutes                | Clostridia                | Clostridiales                      | Ruminococcaceae                    | Subdoligranulum                    | 1,40969E-06 | 5,47074E-06 | 1,68778E-06 | 6,44992E-06 | 1,46139E-06 |
| Bacteria | Firmicutes                | Negativicutes             | Selenomonadales                    | Acidaminococcaceae                 | Succiniclasticum                   | 0           | 0           | 2,22735E-05 | 0           | 0           |
| Bacteria | Firmicutes                | Negativicutes             | Selenomonadales                    | Acidaminococcaceae                 | Succinispira                       | 0           | 0           | 2,07896E-06 | 5,23481E-06 | 0           |
| Bacteria | Proteobacteria            | Gammaproteobacteria       | Aeromonadales                      | Succinivibrionaceae                | Succinivibrio                      | 1,77241E-06 | 0,003642209 | 0,00363348  | 0,000701018 | 0,002322991 |
| Bacteria | Proteobacteria            | Betaproteobacteria        | Rhodocyclales                      | Rhodocyclaceae                     | Sulfuritalea                       | 0           | 0           | 0           | 1,29437E-06 | 0           |

|                 |                                 |                            |                          |                                              |                              |                 |                 |                 |                 |                 |
|-----------------|---------------------------------|----------------------------|--------------------------|----------------------------------------------|------------------------------|-----------------|-----------------|-----------------|-----------------|-----------------|
| <i>Bacteria</i> | <i>Proteobacteria</i>           | <i>Betaproteobacteria</i>  | <i>Burkholderiales</i>   | <i>Sutterellaceae</i>                        | <i>Sutterella</i>            | 0,00188<br>5715 | 0,0018709<br>69 | 0,00026<br>7181 | 0,00014<br>4836 | 0,006417<br>45  |
| <i>Bacteria</i> | <i>Proteobacteria</i>           | <i>Gammaproteobacteria</i> | <i>Cardiobacteriales</i> | <i>Cardiobacteriaceae</i>                    | <i>Suttonella</i>            | 0               | 0               | 4,98644<br>E-07 | 0               | 1,25726E<br>-06 |
| <i>Bacteria</i> | <i>Synergistetes</i>            | <i>Synergistia</i>         | <i>Synergistales</i>     | <i>Synergistaceae</i>                        | <i>Synergistes</i>           | 0               | 0               | 4,98644<br>E-07 | 0               | 0               |
| <i>Bacteria</i> | <i>Firmicutes</i>               | <i>Clostridia</i>          | <i>Clostridiales</i>     | <i>Lachnospiraceae</i>                       | <i>Syntrophococcus</i>       | 0               | 1,36064E-<br>05 | 4,80963<br>E-06 | 1,65851<br>E-05 | 2,12221E<br>-05 |
| <i>Bacteria</i> | <i>Firmicutes</i>               | <i>Clostridia</i>          | <i>Clostridiales</i>     | <i>Syntrophomonadaceae</i>                   | <i>Syntrophothermu<br/>s</i> | 0               | 0               | 0               | 1,49066<br>E-05 | 0               |
| <i>Bacteria</i> | <i>Bacteroidetes</i>            | <i>Bacteroidia</i>         | <i>Bacteroidales</i>     | <i>Porphyromonadaceae</i>                    | <i>Tannerella</i>            | 9,24554<br>E-05 | 0,0015961<br>14 | 0,00280<br>873  | 3,12847<br>E-05 | 2,98878E<br>-05 |
| <i>Bacteria</i> | <i>Proteobacteria</i>           | <i>Alphaproteobacteria</i> | <i>Rhizobiales</i>       | <i>Bradyrhizobiaceae</i>                     | <i>Tardiphaga</i>            | 0               | 0               | 1,54656<br>E-07 | 0               | 0               |
| <i>Bacteria</i> | <i>Proteobacteria</i>           | <i>Gammaproteobacteria</i> | <i>Enterobacteriales</i> | <i>Enterobacteriaceae</i>                    | <i>Tatumella</i>             | 0               | 0               | 6,51909<br>E-06 | 0               | 0               |
| <i>Bacteria</i> | <i>Actinobacteria</i>           | <i>Actinobacteria</i>      | <i>Actinomycetales</i>   | <i>Intrasporangiaceae</i>                    | <i>Terrabacter</i>           | 0               | 0               | 1,76493<br>E-07 | 0               | 0               |
| <i>Bacteria</i> | <i>Acidobacteria</i>            | <i>Acidobacteria_Gp1</i>   | <i>Terriglobus</i>       | <i>Terriglobus</i>                           | <i>Terriglobus</i>           | 0               | 0               | 0               | 1,15619<br>E-06 | 0               |
| <i>Bacteria</i> | <i>Actinobacteria</i>           | <i>Actinobacteria</i>      | <i>Actinomycetales</i>   | <i>Propionibacteriaceae</i>                  | <i>Tessaracoccus</i>         | 0               | 0               | 1,14444<br>E-05 | 0               | 0               |
| <i>Bacteria</i> | <i>Proteobacteria</i>           | <i>Betaproteobacteria</i>  | <i>Rhodocyclales</i>     | <i>Rhodocyclaceae</i>                        | <i>Thauera</i>               | 0               | 0               | 0               | 1,02087<br>E-06 | 0               |
| <i>Bacteria</i> | <i>Firmicutes</i>               | <i>Clostridia</i>          | <i>Clostridiales</i>     | <i>Clostridiaceae 1</i>                      | <i>Thermobrachium</i>        | 0               | 0               | 1,76493<br>E-07 | 0               | 0               |
| <i>Archaea</i>  | <i>Euryarchaeota</i>            | <i>Thermoplasmata</i>      | <i>Thermoplasmatales</i> | <i>Thermoplasmatales_inc<br/>ertae_sedis</i> | <i>Thermogymnomo<br/>nas</i> | 0               | 0,0005300<br>91 | 3,2605E<br>-05  | 7,81647<br>E-05 | 0,000202<br>928 |
| <i>Bacteria</i> | <i>Actinobacteria</i>           | <i>Thermoleophilia</i>     | <i>Thermoleophilales</i> | <i>Thermoleophilaceae</i>                    | <i>Thermoleophilu<br/>m</i>  | 0               | 0               | 1,36693<br>E-06 | 0               | 2,15875E<br>-06 |
| <i>Bacteria</i> | <i>Proteobacteria</i>           | <i>Gammaproteobacteria</i> | <i>Xanthomonadales</i>   | <i>Xanthomonadaceae</i>                      | <i>Thermomonas</i>           | 0               | 0               | 1,27464<br>E-07 | 0               | 0               |
| <i>Bacteria</i> | <i>Deinococcus-<br/>Thermus</i> | <i>Deinococci</i>          | <i>Thermales</i>         | <i>Thermaceae</i>                            | <i>Thermus</i>               | 0               | 0               | 0               | 2,89771<br>E-07 | 0               |
| <i>Bacteria</i> | <i>Proteobacteria</i>           | <i>Betaproteobacteria</i>  | <i>Hydrogenophilales</i> | <i>Hydrogenophilaceae</i>                    | <i>Thiobacillus</i>          | 0               | 0               | 0               | 2,16547<br>E-07 | 0               |
| <i>Bacteria</i> | <i>Proteobacteria</i>           | <i>Betaproteobacteria</i>  | <i>Burkholderiales</i>   | <i>Burkholderiales_inc<br/>erta_sedis</i>    | <i>Thiobacter</i>            | 0               | 0               | 1,84386<br>E-07 | 0               | 0               |
| <i>Bacteria</i> | <i>Firmicutes</i>               | <i>Clostridia</i>          | <i>Clostridiales</i>     | <i>Clostridiales_Incertae<br/>Sedis XI</i>   | <i>Tissierella</i>           | 0               | 1,14513E-<br>06 | 2,3967E<br>-06  | 0               | 2,93361E<br>-06 |

|          |                 |                     |                    |                                  |                  |             |             |             |             |             |
|----------|-----------------|---------------------|--------------------|----------------------------------|------------------|-------------|-------------|-------------|-------------|-------------|
| Bacteria | Proteobacteria  | Gammaproteobacteria | Aeromonadales      | Aeromonadaceae                   | Tolomonas        | 0           | 0           | 0           | 3,47728E-07 | 0           |
| Bacteria | Actinobacteria  | Actinobacteria      | Actinomycetales    | Corynebacterineae_incertae_sedis | Tomitella        | 0           | 0           | 0           | 2,16547E-07 | 0           |
| Bacteria | Spirochaetes    | Spirochaetia        | Spirochaetales     | Spirochaetaceae                  | Treponema        | 6,8467E-06  | 0,018893157 | 0,029077193 | 0,023670822 | 0,03089014  |
| Bacteria | Firmicutes      | Bacilli             | Lactobacillales    | Carnobacteriaceae                | Trichococcus     | 0           | 0           | 1,0938E-06  | 0           | 2,15875E-06 |
| Bacteria | Proteobacteria  | Alphaproteobacteria | Rhodobacterales    | Rhodobacteraceae                 | Tropicimonas     | 2,31227E-06 | 0           | 0           | 0           | 0           |
| Bacteria | Actinobacteria  | Actinobacteria      | Actinomycetales    | Actinomycetaceae                 | Trueperella      | 0           | 0           | 1,56282E-07 | 8,10705E-06 | 0           |
| Bacteria | Actinobacteria  | Actinobacteria      | Actinomycetales    | Tsukamurellaceae                 | Tsukamurella     | 0           | 0           | 0           | 4,02996E-07 | 0           |
| Bacteria | Actinobacteria  | Actinobacteria      | Actinomycetales    | Corynebacteriaceae               | Turicella        | 1,08885E-05 | 9,93508E-06 | 1,58643E-06 | 0           | 6,48123E-06 |
| Bacteria | Firmicutes      | Erysipelotrichia    | Erysipelotrichales | Erysipelotrichaceae              | Turicibacter     | 0,00216658  | 0,000447761 | 0,000448258 | 0,000162526 | 0,005061284 |
| Bacteria | Proteobacteria  | Betaproteobacteria  | Burkholderiales    | Oxalobacteraceae                 | Undibacterium    | 1,82634E-06 | 9,61809E-07 | 3,90107E-07 | 1,88959E-06 | 5,2508E-06  |
| Bacteria | Tenericutes     | Mollicutes          | Mycoplasmatales    | Mycoplasmataceae                 | Ureaplasma       | 0           | 0           | 8,2872E-06  | 1,57888E-06 | 7,24589E-05 |
| Bacteria | Firmicutes      | Bacilli             | Bacillales         | Planococcaceae                   | Ureibacillus     | 0           | 0           | 0           | 0           | 8,22341E-07 |
| Bacteria | Firmicutes      | Bacilli             | Lactobacillales    | Enterococcaceae                  | Vagococcus       | 0           | 0           | 0           | 0           | 2,93361E-06 |
| Bacteria | Proteobacteria  | Deltaproteobacteria | Bdellovibrionales  | Bdellovibrionaceae               | Vampirovibrio    | 0,011589652 | 0,005746942 | 0,004915285 | 0,005838519 | 0,019362328 |
| Bacteria | Proteobacteria  | Betaproteobacteria  | Burkholderiales    | Comamonadaceae                   | Variovorax       | 0           | 1,22217E-06 | 2,57701E-06 | 0           | 3,23092E-06 |
| Bacteria | Firmicutes      | Negativicutes       | Selenomonadales    | Veillonellaceae                  | Veillonella      | 3,23971E-06 | 1,11836E-05 | 4,03886E-05 | 2,15565E-05 | 0,000274621 |
| Bacteria | Verrucomicrobia | Verrucomicrobiae    | Verrucomicrobiales | Verrucomicrobiaceae              | Verrucomicrobium | 0           | 0           | 8,06263E-07 | 0           | 0           |
| Bacteria | Proteobacteria  | Gammaproteobacteria | Vibrionales        | Vibrionaceae                     | Vibrio           | 0           | 0           | 0           | 0           | 1,50014E-06 |
| Bacteria | Lentisphaerae   | Lentisphaeria       | Victivallales      | Victivallaceae                   | Victivallis      | 4,46225E-05 | 0,000271246 | 7,11297E-05 | 5,70807E-06 | 9,84705E-05 |
| Bacteria | Firmicutes      | Bacilli             | Bacillales         | Bacillaceae 2                    | Virgibacillus    | 0           | 0           | 1,76493E-07 | 0           | 0           |

|          |                          |                              |                              |                                   |                              |             |             |             |             |             |
|----------|--------------------------|------------------------------|------------------------------|-----------------------------------|------------------------------|-------------|-------------|-------------|-------------|-------------|
| Bacteria | Proteobacteria           | Betaproteobacteria           | Neisseriales                 | Neisseriaceae                     | Vitreoscilla                 | 0           | 0           | 5,83041E-07 | 0           | 0           |
| Bacteria | Bacteroidetes            | Flavobacteriia               | Flavobacteriales             | Cryomorphaceae                    | Wandonia                     | 0           | 0           | 0           | 4,50315E-07 | 0           |
| Bacteria | Bacteroidetes            | Flavobacteriia               | Flavobacteriales             | Flavobacteriaceae                 | Wautersiella                 | 1,20231E-06 | 1,22217E-06 | 3,4467E-07  | 1,2002E-06  | 1,00009E-06 |
| Bacteria | Firmicutes               | Bacilli                      | Lactobacillales              | Leuconostocaceae                  | Weissella                    | 0           | 3,4354E-06  | 4,81204E-05 | 2,16547E-07 | 7,56571E-06 |
| Bacteria | Proteobacteria           | Epsilonproteobacteria        | Campylobacterales            | Helicobacteraceae                 | Wolinella                    | 0           | 6,38408E-06 | 7,42156E-07 | 5,95733E-06 | 0           |
| Bacteria | candidate division WPS-1 | WPS-1_genera_incertain_sedis | WPS-1_genera_incertain_sedis | WPS-1_genera_incertain_sedis      | WPS-1_genera_incertain_sedis | 1,08774E-06 | 0           | 3,5999E-06  | 0           | 0           |
| Bacteria | candidate division WPS-2 | WPS-2_genera_incertain_sedis | WPS-2_genera_incertain_sedis | WPS-2_genera_incertain_sedis      | WPS-2_genera_incertain_sedis | 0           | 0           | 3,52987E-07 | 0           | 0           |
| Bacteria | Proteobacteria           | Gammaproteobacteria          | Xanthomonadales              | Xanthomonadaceae                  | Xanthomonas                  | 0           | 0           | 3,00249E-06 | 0           | 1,60753E-05 |
| Bacteria | Verrucomicrobia          | Spartobacteria               | Xiphinematobacter            | Xiphinematobacter                 | Xiphinematobacter            | 0           | 0           | 6,18624E-07 | 0           | 0           |
| Bacteria | Bacteroidetes            | Bacteroidia                  | Bacteroidales                | Prevotellaceae                    | Xylanibacter                 | 9,3919E-06  | 0,000155304 | 2,969E-06   | 1,2504E-05  | 0           |
| Bacteria | Actinobacteria           | Actinobacteria               | Actinomycetales              | Micrococcaceae                    | Yaniella                     | 0           | 0           | 1,74217E-06 | 0           | 0           |
| Bacteria | Proteobacteria           | Gammaproteobacteria          | Enterobacteriales            | Enterobacteriaceae                | Yersinia                     | 0           | 3,08529E-05 | 0           | 0           | 0           |
| Bacteria | Planctomycetes           | Planctomycetia               | Planctomycetales             | Planctomycetaceae                 | Zavarzinella                 | 0           | 0           | 1,72335E-07 | 0           | 0           |
| Bacteria | Actinobacteria           | Actinobacteria               | Actinomycetales              | Micrococcaceae                    | Zhihengliuella               | 0           | 0           | 0           | 2,16547E-07 | 0           |
| Bacteria | Proteobacteria           | Betaproteobacteria           | Rhodocyclales                | Rhodocyclaceae                    | Zoogloea                     | 0           | 0           | 0           | 5,78093E-07 | 0           |
| Archaea  | Euryarchaeota            | Methanobacteria              | Methanobacteriales           | Methanobacteriaceae               |                              | 0           | 0,001810226 | 0,005324131 | 0,000219484 | 1,30821E-05 |
| Archaea  | Euryarchaeota            | Thermoplasmata               | Thermoplasmatales            | Thermoplasmatales_incertain_sedis |                              | 0           | 0,000530091 | 3,2605E-05  | 7,81647E-05 | 0,000202928 |
| Bacteria | Acidobacteria            | Acidobacteria_Gp1            | Candidatus Koribacter        | Candidatus Koribacter             |                              | 0           | 0           | 1,92029E-07 | 6,2012E-07  | 0           |
| Bacteria | Acidobacteria            | Acidobacteria_Gp1            | Edaphobacter                 | Edaphobacter                      |                              | 0           | 0           | 4,65595E-07 | 0           | 0           |

|                 |                       |                           |                         |                                         |  |             |             |             |             |             |
|-----------------|-----------------------|---------------------------|-------------------------|-----------------------------------------|--|-------------|-------------|-------------|-------------|-------------|
| <i>Bacteria</i> | <i>Acidobacteria</i>  | <i>Acidobacteria_Gp1</i>  | <i>Gp1</i>              | <i>Gp1</i>                              |  | 0           | 0           | 9,37695E-07 | 0           | 0           |
| <i>Bacteria</i> | <i>Acidobacteria</i>  | <i>Acidobacteria_Gp1</i>  | <i>Granulicella</i>     | <i>Granulicella</i>                     |  | 0           | 0           | 0           | 5,78093E-07 | 0           |
| <i>Bacteria</i> | <i>Acidobacteria</i>  | <i>Acidobacteria_Gp1</i>  | <i>Terriglobus</i>      | <i>Terriglobus</i>                      |  | 0           | 0           | 0           | 1,15619E-06 | 0           |
| <i>Bacteria</i> | <i>Acidobacteria</i>  | <i>Acidobacteria_Gp16</i> | <i>Gp16</i>             | <i>Gp16</i>                             |  | 0           | 0           | 1,10742E-06 | 0           | 8,635E-07   |
| <i>Bacteria</i> | <i>Acidobacteria</i>  | <i>Acidobacteria_Gp2</i>  | <i>Gp2</i>              | <i>Gp2</i>                              |  | 0           | 0           | 8,7086E-07  | 0           | 1,55733E-05 |
| <i>Bacteria</i> | <i>Acidobacteria</i>  | <i>Acidobacteria_Gp3</i>  | <i>Gp3</i>              | <i>Gp3</i>                              |  | 0           | 0           | 9,698E-07   | 5,56336E-07 | 0           |
| <i>Bacteria</i> | <i>Acidobacteria</i>  | <i>Acidobacteria_Gp4</i>  | <i>Blastocatella</i>    | <i>Blastocatella</i>                    |  | 0           | 0           | 8,82467E-07 | 6,49642E-07 | 0           |
| <i>Bacteria</i> | <i>Acidobacteria</i>  | <i>Acidobacteria_Gp4</i>  | <i>Gp4</i>              | <i>Gp4</i>                              |  | 6,51926E-06 | 0           | 2,17315E-06 | 8,46107E-07 | 0           |
| <i>Bacteria</i> | <i>Acidobacteria</i>  | <i>Acidobacteria_Gp6</i>  | <i>Gp6</i>              | <i>Gp6</i>                              |  | 2,31227E-06 | 0           | 5,80644E-06 | 0           | 0           |
| <i>Bacteria</i> | <i>Acidobacteria</i>  | <i>Acidobacteria_Gp7</i>  | <i>Gp7</i>              | <i>Gp7</i>                              |  | 0           | 0           | 7,53505E-07 | 4,50315E-07 | 0           |
| <i>Bacteria</i> | <i>Actinobacteria</i> | <i>Actinobacteria</i>     | <i>Acidimicrobiales</i> | <i>Acidimicrobiaceae</i>                |  | 5,78067E-06 | 0           | 5,82098E-07 | 3,64645E-07 | 1,46139E-06 |
| <i>Bacteria</i> | <i>Actinobacteria</i> | <i>Actinobacteria</i>     | <i>Acidimicrobiales</i> | <i>Acidimicrobinea" _inceptae_sedis</i> |  | 0           | 0           | 6,02309E-07 | 0           | 0           |
| <i>Bacteria</i> | <i>Actinobacteria</i> | <i>Actinobacteria</i>     | <i>Acidimicrobiales</i> | <i>Iamiaceae</i>                        |  | 0           | 0           | 9,60051E-07 | 0           | 0           |
| <i>Bacteria</i> | <i>Actinobacteria</i> | <i>Actinobacteria</i>     | <i>Actinomycetales</i>  | <i>Acidothermaceae</i>                  |  | 0           | 0           | 1,76493E-07 | 0           | 0           |
| <i>Bacteria</i> | <i>Actinobacteria</i> | <i>Actinobacteria</i>     | <i>Actinomycetales</i>  | <i>Actinomycetaceae</i>                 |  | 4,05959E-06 | 3,32911E-06 | 3,68537E-05 | 2,73528E-05 | 4,25586E-06 |
| <i>Bacteria</i> | <i>Actinobacteria</i> | <i>Actinobacteria</i>     | <i>Actinomycetales</i>  | <i>Beutenbergiaceae</i>                 |  | 0           | 0           | 1,92724E-07 | 0           | 0           |
| <i>Bacteria</i> | <i>Actinobacteria</i> | <i>Actinobacteria</i>     | <i>Actinomycetales</i>  | <i>Bogoriellaceae</i>                   |  | 0           | 0           | 6,67018E-07 | 0           | 0           |
| <i>Bacteria</i> | <i>Actinobacteria</i> | <i>Actinobacteria</i>     | <i>Actinomycetales</i>  | <i>Brevibacteriaceae</i>                |  | 3,42656E-06 | 0           | 1,96173E-06 | 6,2012E-07  | 5,98119E-06 |
| <i>Bacteria</i> | <i>Actinobacteria</i> | <i>Actinobacteria</i>     | <i>Actinomycetales</i>  | <i>Cellulomonadaceae</i>                |  | 0           | 0           | 1,10121E-06 | 1,01429E-06 | 0           |
| <i>Bacteria</i> | <i>Actinobacteria</i> | <i>Actinobacteria</i>     | <i>Actinomycetales</i>  | <i>Corynebacteriaceae</i>               |  | 2,95128E-05 | 3,62898E-05 | 6,62453E-05 | 1,00516E-05 | 0,000190008 |

|                 |                       |                       |                        |                                              |  |                 |                 |                 |                 |                 |
|-----------------|-----------------------|-----------------------|------------------------|----------------------------------------------|--|-----------------|-----------------|-----------------|-----------------|-----------------|
| <i>Bacteria</i> | <i>Actinobacteria</i> | <i>Actinobacteria</i> | <i>Actinomycetales</i> | <i>Corynebacterineae_ince<br/>rtae_sedis</i> |  | 0               | 0               | 0               | 2,16547<br>E-07 | 0               |
| <i>Bacteria</i> | <i>Actinobacteria</i> | <i>Actinobacteria</i> | <i>Actinomycetales</i> | <i>Demequinaceae</i>                         |  | 0               | 0               | 7,20861<br>E-07 | 0               | 0               |
| <i>Bacteria</i> | <i>Actinobacteria</i> | <i>Actinobacteria</i> | <i>Actinomycetales</i> | <i>Dermabacteraceae</i>                      |  | 0               | 0               | 1,63303<br>E-05 | 2,16547<br>E-07 | 2,67644E<br>-06 |
| <i>Bacteria</i> | <i>Actinobacteria</i> | <i>Actinobacteria</i> | <i>Actinomycetales</i> | <i>Dermacoccaceae</i>                        |  | 0               | 0               | 2,09912<br>E-06 | 0               | 0               |
| <i>Bacteria</i> | <i>Actinobacteria</i> | <i>Actinobacteria</i> | <i>Actinomycetales</i> | <i>Dietziaceae</i>                           |  | 1,07312<br>E-05 | 9,61809E-<br>07 | 3,2231E<br>-05  | 1,23742<br>E-06 | 2,07444E<br>-05 |
| <i>Bacteria</i> | <i>Actinobacteria</i> | <i>Actinobacteria</i> | <i>Actinomycetales</i> | <i>Geodermatophilaceae</i>                   |  | 0               | 0               | 1,4846E<br>-06  | 1,45679<br>E-06 | 2,50818E<br>-06 |
| <i>Bacteria</i> | <i>Actinobacteria</i> | <i>Actinobacteria</i> | <i>Actinomycetales</i> | <i>Intrasporangiaceae</i>                    |  | 3,4684E<br>-06  | 9,62643E-<br>07 | 0,00016<br>6751 | 3,25913<br>E-06 | 6,82568E<br>-06 |
| <i>Bacteria</i> | <i>Actinobacteria</i> | <i>Actinobacteria</i> | <i>Actinomycetales</i> | <i>Kineosporiaceae</i>                       |  | 0               | 0               | 2,10978<br>E-06 | 1,17646<br>E-06 | 0               |
| <i>Bacteria</i> | <i>Actinobacteria</i> | <i>Actinobacteria</i> | <i>Actinomycetales</i> | <i>Microbacteriaceae</i>                     |  | 2,66142<br>E-06 | 4,80441E-<br>06 | 2,51594<br>E-05 | 5,86442<br>E-06 | 7,26272E<br>-05 |
| <i>Bacteria</i> | <i>Actinobacteria</i> | <i>Actinobacteria</i> | <i>Actinomycetales</i> | <i>Micrococcaceae</i>                        |  | 1,41485<br>E-05 | 5,21073E-<br>06 | 4,75692<br>E-05 | 0,00429<br>7798 | 5,09956E<br>-05 |
| <i>Bacteria</i> | <i>Actinobacteria</i> | <i>Actinobacteria</i> | <i>Actinomycetales</i> | <i>Micromonosporaceae</i>                    |  | 0               | 0               | 1,1211E<br>-06  | 0               | 5,75639E<br>-06 |
| <i>Bacteria</i> | <i>Actinobacteria</i> | <i>Actinobacteria</i> | <i>Actinomycetales</i> | <i>Mycobacteriaceae</i>                      |  | 0               | 0               | 3,02927<br>E-06 | 6,09384<br>E-06 | 1,64468E<br>-06 |
| <i>Bacteria</i> | <i>Actinobacteria</i> | <i>Actinobacteria</i> | <i>Actinomycetales</i> | <i>Nakamurellaceae</i>                       |  | 0               | 0               | 4,67221<br>E-07 | 4,02996<br>E-07 | 4,3175E-<br>07  |
| <i>Bacteria</i> | <i>Actinobacteria</i> | <i>Actinobacteria</i> | <i>Actinomycetales</i> | <i>Nocardiaceae</i>                          |  | 2,12431<br>E-06 | 1,14513E-<br>06 | 8,37373<br>E-06 | 0               | 3,29873E<br>-05 |
| <i>Bacteria</i> | <i>Actinobacteria</i> | <i>Actinobacteria</i> | <i>Actinomycetales</i> | <i>Nocardioideaceae</i>                      |  | 5,78067<br>E-06 | 0               | 1,16763<br>E-05 | 5,75268<br>E-06 | 0               |
| <i>Bacteria</i> | <i>Actinobacteria</i> | <i>Actinobacteria</i> | <i>Actinomycetales</i> | <i>Promicromonosporacea<br/>e</i>            |  | 0               | 0               | 1,13133<br>E-06 | 5,64275<br>E-07 | 5,0482E-<br>06  |
| <i>Bacteria</i> | <i>Actinobacteria</i> | <i>Actinobacteria</i> | <i>Actinomycetales</i> | <i>Propionibacteriaceae</i>                  |  | 2,57095<br>E-05 | 2,4028E-<br>05  | 3,75492<br>E-05 | 3,12955<br>E-05 | 8,64484E<br>-05 |
| <i>Bacteria</i> | <i>Actinobacteria</i> | <i>Actinobacteria</i> | <i>Actinomycetales</i> | <i>Pseudonocardiaceae</i>                    |  | 0               | 0               | 2,11914<br>E-06 | 0               | 7,30695E<br>-07 |
| <i>Bacteria</i> | <i>Actinobacteria</i> | <i>Actinobacteria</i> | <i>Actinomycetales</i> | <i>Sanguibacteraceae</i>                     |  | 0               | 0               | 0               | 9,00631<br>E-07 | 0               |
| <i>Bacteria</i> | <i>Actinobacteria</i> | <i>Actinobacteria</i> | <i>Actinomycetales</i> | <i>Sporichthyaceae</i>                       |  | 0               | 0               | 1,27464<br>E-07 | 0               | 0               |



|                 |                        |                                    |                                |                                |  |             |             |             |             |             |
|-----------------|------------------------|------------------------------------|--------------------------------|--------------------------------|--|-------------|-------------|-------------|-------------|-------------|
| <i>Bacteria</i> | <i>Actinobacteria</i>  | <i>Actinobacteria</i>              | <i>Actinomycetales</i>         | <i>Streptomycetaceae</i>       |  | 0           | 0           | 3,52987E-07 | 1,22773E-06 | 0           |
| <i>Bacteria</i> | <i>Actinobacteria</i>  | <i>Actinobacteria</i>              | <i>Actinomycetales</i>         | <i>Tsukamurellaceae</i>        |  | 0           | 0           | 0           | 4,02996E-07 | 0           |
| <i>Bacteria</i> | <i>Actinobacteria</i>  | <i>Actinobacteria</i>              | <i>Bifidobacteriales</i>       | <i>Bifidobacteriaceae</i>      |  | 0           | 2,201E-05   | 0,001364881 | 0           | 0,00022456  |
| <i>Bacteria</i> | <i>Actinobacteria</i>  | <i>Actinobacteria</i>              | <i>Coriobacteriales</i>        | <i>Coriobacteriaceae</i>       |  | 0,000756844 | 0,001146768 | 0,005768236 | 0,00192916  | 0,001054867 |
| <i>Bacteria</i> | <i>Actinobacteria</i>  | <i>Actinobacteria</i>              | <i>Euzebyales</i>              | <i>Euzebyaceae</i>             |  | 0           | 0           | 3,52987E-07 | 0           | 0           |
| <i>Bacteria</i> | <i>Actinobacteria</i>  | <i>Actinobacteria</i>              | <i>Gaiellales</i>              | <i>Gaiellaceae</i>             |  | 0           | 0           | 2,32654E-06 | 1,74562E-06 | 2,02595E-06 |
| <i>Bacteria</i> | <i>Actinobacteria</i>  | <i>Actinobacteria</i>              | <i>Rubrobacterales</i>         | <i>Rubrobacteraceae</i>        |  | 1,08774E-06 | 1,30262E-06 | 1,61254E-06 | 3,3313E-06  | 1,84938E-05 |
| <i>Bacteria</i> | <i>Actinobacteria</i>  | <i>Actinobacteria</i>              | <i>Solirubrobacterales</i>     | <i>Conexibacteraceae</i>       |  | 1,15613E-06 | 0           | 8,44179E-07 | 0           | 0           |
| <i>Bacteria</i> | <i>Actinobacteria</i>  | <i>Actinobacteria</i>              | <i>Solirubrobacterales</i>     | <i>Patulibacteraceae</i>       |  | 0           | 0           | 0           | 6,2012E-07  | 0           |
| <i>Bacteria</i> | <i>Actinobacteria</i>  | <i>Actinobacteria</i>              | <i>Solirubrobacterales</i>     | <i>Solirubrobacteraceae</i>    |  | 0           | 0           | 2,42555E-06 | 1,13443E-06 | 0           |
| <i>Bacteria</i> | <i>Actinobacteria</i>  | <i>Thermoleophilia</i>             | <i>Thermoleophilales</i>       | <i>Thermoleophilaceae</i>      |  | 0           | 0           | 1,36693E-06 | 0           | 2,15875E-06 |
| <i>Bacteria</i> | <i>Armatimonadetes</i> | <i>Armatimonadetes_gp4</i>         | <i>Armatimonadetes_gp4</i>     | <i>Armatimonadetes_gp4</i>     |  | 0           | 0           | 3,85448E-07 | 0           | 0           |
| <i>Bacteria</i> | <i>Armatimonadetes</i> | <i>Armatimonadetes_gp5</i>         | <i>Armatimonadetes_gp5</i>     | <i>Armatimonadetes_gp5</i>     |  | 0           | 0           | 4,56803E-07 | 2,16547E-07 | 0           |
| <i>Bacteria</i> | <i>Armatimonadetes</i> | <i>Armatimonadia</i>               | <i>Armatimonadales</i>         | <i>Armatimonadaceae</i>        |  | 0           | 0           | 5,2948E-07  | 0           | 0           |
| <i>Bacteria</i> | <i>Armatimonadetes</i> | <i>Chthonomonadetes</i>            | <i>Chthonomonadales</i>        | <i>Chthonomonadaceae</i>       |  | 0           | 0           | 2,8157E-07  | 0           | 0           |
| <i>Bacteria</i> | <i>BRC1</i>            | <i>BRC1_genera_incertainae</i>     | <i>BRC1_genera_incertainae</i> | <i>BRC1_genera_incertainae</i> |  | 0           | 0           | 0           | 2,16547E-07 | 0           |
| <i>Bacteria</i> | <i>Bacteroidetes</i>   | <i>Bacteroidetes" _incertainae</i> | <i>Marinifilum</i>             | <i>Marinifilum</i>             |  | 0           | 0           | 0           | 0           | 4,3175E-07  |
| <i>Bacteria</i> | <i>Bacteroidetes</i>   | <i>Bacteroidetes" _incertainae</i> | <i>Ohtaekwangia</i>            | <i>Ohtaekwangia</i>            |  | 2,31227E-06 | 0           | 1,05189E-06 | 0           | 0           |
| <i>Bacteria</i> | <i>Bacteroidetes</i>   | <i>Bacteroidetes" _incertainae</i> | <i>Prolixibacter</i>           | <i>Prolixibacter</i>           |  | 0           | 1,4956E-05  | 4,60037E-06 | 1,47076E-05 | 0           |
| <i>Bacteria</i> | <i>Bacteroidetes</i>   | <i>Bacteroidia</i>                 | <i>Bacteroidales</i>           | <i>Bacteroidaceae</i>          |  | 0,05184428  | 0,012037178 | 0,02026617  | 0,001971161 | 0,028345395 |

|          |                             |                                        |                                        |                                        |  |             |             |             |             |             |
|----------|-----------------------------|----------------------------------------|----------------------------------------|----------------------------------------|--|-------------|-------------|-------------|-------------|-------------|
| Bacteria | Bacteroidetes               | Bacteroidia                            | Bacteroidales                          | Bacteroidales"_incertae_sedis          |  | 0           | 0           | 1,12067E-06 | 6,37546E-05 | 0           |
| Bacteria | Bacteroidetes               | Bacteroidia                            | Bacteroidales                          | Marinilabiliaceae                      |  | 0           | 0           | 1,16074E-06 | 3,28161E-06 | 1,9543E-05  |
| Bacteria | Bacteroidetes               | Bacteroidia                            | Bacteroidales                          | Porphyromonadaceae                     |  | 0,034561785 | 0,0506325   | 0,076216376 | 0,026358342 | 0,048062276 |
| Bacteria | Bacteroidetes               | Bacteroidia                            | Bacteroidales                          | Prevotellaceae                         |  | 0,176025408 | 0,24043013  | 0,142395485 | 0,146148025 | 0,096734508 |
| Bacteria | Bacteroidetes               | Bacteroidia                            | Bacteroidales                          | Rikenellaceae                          |  | 0,027483265 | 0,000501952 | 0,000177965 | 6,29729E-06 | 0,000884586 |
| Bacteria | Bacteroidetes               | Cytophagia                             | Cytophagales                           | Cytophagaceae                          |  | 2,52547E-06 | 5,40539E-06 | 8,3456E-06  | 4,53189E-05 | 1,91922E-06 |
| Bacteria | Bacteroidetes               | Cytophagia                             | Cytophagales                           | Flammeovirgaceae                       |  | 0           | 0           | 1,27464E-07 | 4,70618E-07 | 0           |
| Bacteria | Bacteroidetes               | Flavobacteriia                         | Flavobacteriales                       | Cryomorphaceae                         |  | 0           | 6,07143E-06 | 1,20756E-06 | 1,51085E-05 | 0           |
| Bacteria | Bacteroidetes               | Flavobacteriia                         | Flavobacteriales                       | Flavobacteriaceae                      |  | 1,38899E-05 | 0,009118713 | 0,011517735 | 0,016462586 | 0,007175793 |
| Bacteria | Bacteroidetes               | Sphingobacteriia                       | Sphingobacteriales                     | Chitinophagaceae                       |  | 1,15613E-06 | 1,14513E-06 | 1,23792E-05 | 0,004729916 | 3,18238E-05 |
| Bacteria | Bacteroidetes               | Sphingobacteriia                       | Sphingobacteriales                     | Rhodothermaceae                        |  | 1,15613E-06 | 0           | 0           | 0           | 0           |
| Bacteria | Bacteroidetes               | Sphingobacteriia                       | Sphingobacteriales                     | Saprosiraceae                          |  | 0           | 0           | 0           | 9,70778E-07 | 0           |
| Bacteria | Bacteroidetes               | Sphingobacteriia                       | Sphingobacteriales                     | Sphingobacteriaceae                    |  | 1,08697E-05 | 0,015231129 | 0,004527715 | 0,001547794 | 1,6074E-05  |
| Bacteria | Candidatus Saccharibacteria | Saccharibacteria_genera_incertae_sedis | Saccharibacteria_genera_incertae_sedis | Saccharibacteria_genera_incertae_sedis |  | 1,99122E-06 | 7,69525E-05 | 0,00053016  | 0,002204092 | 0,000102494 |
| Bacteria | Chlamydiae                  | Chlamydiia                             | Chlamydiales                           | Chlamydiaceae                          |  | 0           | 0,00069837  | 7,64786E-07 | 0,000768975 | 0           |
| Bacteria | Chlamydiae                  | Chlamydiia                             | Chlamydiales                           | Parachlamydiaceae                      |  | 0           | 0           | 2,22173E-06 | 0           | 1,25726E-06 |
| Bacteria | Chloroflexi                 | Anaerolineae                           | Anaerolineales                         | Anaerolineaceae                        |  | 0           | 0           | 1,76493E-07 | 0,000191085 | 4,38417E-06 |
| Bacteria | Chloroflexi                 | Caldilineae                            | Caldilineales                          | Caldilineaceae                         |  | 5,78067E-06 | 0           | 0           | 0           | 0           |
| Bacteria | Chloroflexi                 | Chloroflexia                           | Chloroflexales                         | Chloroflexaceae                        |  | 0           | 0           | 3,52987E-07 | 0           | 4,3175E-07  |

|          |                                  |                        |                          |                                      |  |             |             |             |             |             |
|----------|----------------------------------|------------------------|--------------------------|--------------------------------------|--|-------------|-------------|-------------|-------------|-------------|
| Bacteria | <i>Chloroflexi</i>               | <i>Thermomicrobia</i>  | <i>Sphaerobacterales</i> | <i>Sphaerobacteraceae</i>            |  | 3,4684E-06  | 0           | 1,36342E-05 | 2,16547E-07 | 0           |
| Bacteria | <i>Cyanobacteria/Chloroplast</i> | <i>Chloroplast</i>     | <i>Chloroplast</i>       | <i>Chloroplast</i>                   |  | 3,94789E-06 | 1,03565E-05 | 0,001322938 | 3,93451E-05 | 3,27429E-05 |
| Bacteria | <i>Cyanobacteria/Chloroplast</i> | <i>Cyanobacteria</i>   | <i>Family II</i>         | <i>Family II</i>                     |  | 0           | 0           | 0           | 8,20773E-07 | 0           |
| Bacteria | <i>Cyanobacteria/Chloroplast</i> | <i>Cyanobacteria</i>   | <i>Family XIII</i>       | <i>Family XIII</i>                   |  | 0           | 0           | 1,56282E-07 | 4,33095E-07 | 0           |
| Bacteria | <i>Deferribacteres</i>           | <i>Deferribacteres</i> | <i>Deferribacterales</i> | <i>Deferribacteraceae</i>            |  | 0           | 5,59831E-05 | 5,09107E-05 | 0,000582846 | 0           |
| Bacteria | <i>Deinococcus-Thermus</i>       | <i>Deinococci</i>      | <i>Deinococcales</i>     | <i>Deinococcaceae</i>                |  | 3,4684E-06  | 0           | 1,80215E-07 | 4,70618E-07 | 8,635E-07   |
| Bacteria | <i>Deinococcus-Thermus</i>       | <i>Deinococci</i>      | <i>Thermales</i>         | <i>Thermaceae</i>                    |  | 0           | 0           | 0           | 2,89771E-07 | 2,15875E-06 |
| Bacteria | <i>Elusimicrobia</i>             | <i>Elusimicrobia</i>   | <i>Elusimicrobiales</i>  | <i>Elusimicrobiaceae</i>             |  | 0,006730554 | 0,001870505 | 0,000328789 | 0           | 0,008924486 |
| Bacteria | <i>Fibrobacteres</i>             | <i>Fibrobacteria</i>   | <i>Fibrobacterales</i>   | <i>Fibrobacteraceae</i>              |  | 0           | 0,000746676 | 0,00226435  | 0,00128398  | 0,000893402 |
| Bacteria | <i>Firmicutes</i>                | <i>Bacilli</i>         | <i>Bacillales</i>        | <i>Bacillaceae 1</i>                 |  | 0           | 0           | 0,01416457  | 0,002479004 | 0,003630439 |
| Bacteria | <i>Firmicutes</i>                | <i>Bacilli</i>         | <i>Bacillales</i>        | <i>Bacillaceae 2</i>                 |  | 0           | 4,48899E-06 | 0,0001166   | 3,57568E-05 | 1,38718E-05 |
| Bacteria | <i>Firmicutes</i>                | <i>Bacilli</i>         | <i>Bacillales</i>        | <i>Bacillales_Incertae Sedis XI</i>  |  | 2,1233E-06  | 0           | 7,89213E-07 | 0           | 8,10378E-06 |
| Bacteria | <i>Firmicutes</i>                | <i>Bacilli</i>         | <i>Bacillales</i>        | <i>Bacillales_Incertae Sedis XII</i> |  | 0           | 0           | 5,82297E-06 | 0           | 0           |
| Bacteria | <i>Firmicutes</i>                | <i>Bacilli</i>         | <i>Bacillales</i>        | <i>Listeriaceae</i>                  |  | 0           | 0           | 0           | 0           | 2,15875E-06 |
| Bacteria | <i>Firmicutes</i>                | <i>Bacilli</i>         | <i>Bacillales</i>        | <i>Paenibacillaceae 1</i>            |  | 0           | 0           | 1,42281E-06 | 2,29949E-05 | 0           |
| Bacteria | <i>Firmicutes</i>                | <i>Bacilli</i>         | <i>Bacillales</i>        | <i>Paenibacillaceae 2</i>            |  | 0           | 1,36064E-06 | 2,49322E-07 | 0           | 0           |
| Bacteria | <i>Firmicutes</i>                | <i>Bacilli</i>         | <i>Bacillales</i>        | <i>Planococcaceae</i>                |  | 1,00073E-05 | 0,013556235 | 0,005071204 | 0,004071065 | 0,001670146 |
| Bacteria | <i>Firmicutes</i>                | <i>Bacilli</i>         | <i>Bacillales</i>        | <i>Staphylococcaceae</i>             |  | 1,95708E-05 | 1,56933E-05 | 1,01267E-05 | 0,000158633 | 7,82365E-05 |
| Bacteria | <i>Firmicutes</i>                | <i>Bacilli</i>         | <i>Lactobacillales</i>   | <i>Aerococcaceae</i>                 |  | 1,79259E-06 | 2,50577E-06 | 5,86989E-05 | 3,77181E-05 | 3,76656E-05 |
| Bacteria | <i>Firmicutes</i>                | <i>Bacilli</i>         | <i>Lactobacillales</i>   | <i>Carnobacteriaceae</i>             |  | 6,85991E-06 | 6,13168E-06 | 9,37774E-06 | 4,39996E-06 | 4,51041E-05 |

|                 |                   |                   |                        |                                              |  |                 |                 |                 |                 |                 |
|-----------------|-------------------|-------------------|------------------------|----------------------------------------------|--|-----------------|-----------------|-----------------|-----------------|-----------------|
| <i>Bacteria</i> | <i>Firmicutes</i> | <i>Bacilli</i>    | <i>Lactobacillales</i> | <i>Enterococcaceae</i>                       |  | 5,73739<br>E-06 | 1,62824E-<br>05 | 2,50554<br>E-05 | 1,49512<br>E-06 | 0,000558<br>781 |
| <i>Bacteria</i> | <i>Firmicutes</i> | <i>Bacilli</i>    | <i>Lactobacillales</i> | <i>Lactobacillaceae</i>                      |  | 5,5825E<br>-05  | 0,0049134<br>09 | 0,01219<br>4856 | 0,00062<br>9258 | 0,000454<br>776 |
| <i>Bacteria</i> | <i>Firmicutes</i> | <i>Bacilli</i>    | <i>Lactobacillales</i> | <i>Leuconostocaceae</i>                      |  | 0               | 7,26281E-<br>06 | 5,20423<br>E-05 | 2,16547<br>E-07 | 7,56571E<br>-06 |
| <i>Bacteria</i> | <i>Firmicutes</i> | <i>Clostridia</i> | <i>Clostridiales</i>   | <i>Clostridiaceae 1</i>                      |  | 0,00148<br>0926 | 0,0019029<br>7  | 0,00580<br>0648 | 0,00385<br>8588 | 0,001638<br>696 |
| <i>Bacteria</i> | <i>Firmicutes</i> | <i>Clostridia</i> | <i>Clostridiales</i>   | <i>Clostridiaceae 2</i>                      |  | 0               | 1,14513E-<br>06 | 1,27784<br>E-06 | 1,25444<br>E-06 | 0               |
| <i>Bacteria</i> | <i>Firmicutes</i> | <i>Clostridia</i> | <i>Clostridiales</i>   | <i>Clostridiaceae 3</i>                      |  | 0               | 0               | 1,54656<br>E-07 | 0               | 0               |
| <i>Bacteria</i> | <i>Firmicutes</i> | <i>Clostridia</i> | <i>Clostridiales</i>   | <i>Clostridiaceae 4</i>                      |  | 8,35086<br>E-07 | 2,99596E-<br>06 | 2,77498<br>E-06 | 0               | 1,89314E<br>-06 |
| <i>Bacteria</i> | <i>Firmicutes</i> | <i>Clostridia</i> | <i>Clostridiales</i>   | <i>Clostridiales_Incertae<br/>Sedis XI</i>   |  | 0,00012<br>1624 | 7,35651E-<br>05 | 0,00016<br>4506 | 1,9857E<br>-05  | 3,82361E<br>-05 |
| <i>Bacteria</i> | <i>Firmicutes</i> | <i>Clostridia</i> | <i>Clostridiales</i>   | <i>Clostridiales_Incertae<br/>Sedis XII</i>  |  | 0,00014<br>3982 | 0,0003027<br>9  | 0,00140<br>5746 | 8,43298<br>E-05 | 0,000313<br>427 |
| <i>Bacteria</i> | <i>Firmicutes</i> | <i>Clostridia</i> | <i>Clostridiales</i>   | <i>Clostridiales_Incertae<br/>Sedis XIII</i> |  | 0,00696<br>5627 | 0,004626        | 0,00772<br>0518 | 0,00735<br>4206 | 0,001293<br>406 |
| <i>Bacteria</i> | <i>Firmicutes</i> | <i>Clostridia</i> | <i>Clostridiales</i>   | <i>Defluviitaleaceae</i>                     |  | 0,00075<br>7012 | 0,0001402<br>38 | 0,00013<br>9525 | 0,00091<br>8847 | 0,000154<br>871 |
| <i>Bacteria</i> | <i>Firmicutes</i> | <i>Clostridia</i> | <i>Clostridiales</i>   | <i>Eubacteriaceae</i>                        |  | 0,00284<br>0856 | 0,0041131<br>37 | 0,00764<br>0591 | 0,00408<br>2753 | 0,002767<br>016 |
| <i>Bacteria</i> | <i>Firmicutes</i> | <i>Clostridia</i> | <i>Clostridiales</i>   | <i>Gracilibacteraceae</i>                    |  | 0,00066<br>336  | 0,0005466<br>49 | 0,00052<br>4963 | 9,83864<br>E-05 | 0,001660<br>955 |
| <i>Bacteria</i> | <i>Firmicutes</i> | <i>Clostridia</i> | <i>Clostridiales</i>   | <i>Incertae Sedis XI</i>                     |  | 0               | 0               | 3,98414<br>E-06 | 5,8752E<br>-05  | 0               |
| <i>Bacteria</i> | <i>Firmicutes</i> | <i>Clostridia</i> | <i>Clostridiales</i>   | <i>Lachnospiraceae</i>                       |  | 0,14097<br>9019 | 0,1413934<br>23 | 0,16733<br>6771 | 0,19924<br>934  | 0,165506<br>083 |
| <i>Bacteria</i> | <i>Firmicutes</i> | <i>Clostridia</i> | <i>Clostridiales</i>   | <i>Natranaerovirga</i>                       |  | 0               | 0               | 1,22257<br>E-06 | 3,23593<br>E-07 | 8,635E-<br>07   |
| <i>Bacteria</i> | <i>Firmicutes</i> | <i>Clostridia</i> | <i>Clostridiales</i>   | <i>Peptococcaceae 1</i>                      |  | 0,00022<br>6247 | 0,0001304<br>71 | 0,00053<br>7594 | 0,00039<br>0801 | 0,001385<br>708 |
| <i>Bacteria</i> | <i>Firmicutes</i> | <i>Clostridia</i> | <i>Clostridiales</i>   | <i>Peptostreptococcaceae</i>                 |  | 0,00335<br>2002 | 0,0024977<br>11 | 0,00261<br>2007 | 0,00574<br>793  | 0,018231<br>012 |
| <i>Bacteria</i> | <i>Firmicutes</i> | <i>Clostridia</i> | <i>Clostridiales</i>   | <i>Ruminococcaceae</i>                       |  | 0,36890<br>5606 | 0,2143051<br>39 | 0,20411<br>6357 | 0,13881<br>0581 | 0,217065<br>546 |
| <i>Bacteria</i> | <i>Firmicutes</i> | <i>Clostridia</i> | <i>Clostridiales</i>   | <i>Syntrophomonadaceae</i>                   |  | 1,35932<br>E-05 | 4,54903E-<br>06 | 3,14114<br>E-05 | 4,34577<br>E-05 | 1,92161E<br>-05 |

|          |                  |                                     |                                     |                                     |             |             |             |             |             |
|----------|------------------|-------------------------------------|-------------------------------------|-------------------------------------|-------------|-------------|-------------|-------------|-------------|
| Bacteria | Firmicutes       | Clostridia                          | Thermoanaerobacterales              | Thermoanaerobacteraceae             | 0           | 0           | 1,56282E-07 | 1,23561E-06 | 0           |
| Bacteria | Firmicutes       | Erysipelotrichia                    | Erysipelotrichales                  | Erysipelotrichaceae                 | 0,012482446 | 0,005930106 | 0,011187702 | 0,021082713 | 0,01591162  |
| Bacteria | Firmicutes       | Negativicutes                       | Selenomonadales                     | Acidaminococcaceae                  | 0,010739222 | 0,032791287 | 0,017857787 | 0,05070666  | 0,004934776 |
| Bacteria | Firmicutes       | Negativicutes                       | Selenomonadales                     | Veillonellaceae                     | 0,004248334 | 0,010184416 | 0,01369963  | 0,00788023  | 0,002743927 |
| Bacteria | Fusobacteria     | Fusobacteriia                       | Fusobacteriales                     | Fusobacteriaceae                    | 7,04847E-07 | 4,88868E-06 | 0,000509656 | 6,70056E-05 | 5,46591E-05 |
| Bacteria | Fusobacteria     | Fusobacteriia                       | Fusobacteriales                     | Leptotrichiaceae                    | 1,06266E-06 | 2,10778E-06 | 3,90107E-07 | 0           | 7,30695E-07 |
| Bacteria | Gemmatimonadetes | Gemmatimonadetes                    | Gemmatimonadales                    | Gemmatimonadaceae                   | 0           | 0           | 6,20688E-06 | 2,12386E-06 | 8,22341E-07 |
| Bacteria | Lentisphaerae    | Lentisphaeria                       | Victivallales                       | Victivallaceae                      | 4,46225E-05 | 0,000271246 | 7,11297E-05 | 5,70807E-06 | 9,84705E-05 |
| Bacteria | Lentisphaerae    | Oligosphaeria                       | Oligosphaerales                     | Oligosphaeraceae                    | 0           | 5,69725E-06 | 2,11151E-06 | 2,77339E-06 | 0           |
| Bacteria | Nitrospirae      | Nitrospira                          | Nitrospirales                       | Nitrospiraceae                      | 0           | 0           | 2,1459E-06  | 0           | 0           |
| Bacteria | Parcubacteria    | Parcubacteria_genera_incertae_sedis | Parcubacteria_genera_incertae_sedis | Parcubacteria_genera_incertae_sedis | 0           | 0           | 6,24915E-07 | 4,02996E-07 | 5,61184E-06 |
| Bacteria | Planctomycetes   | Planctomycetia                      | Planctomycetales                    | Planctomycetaceae                   | 4,62453E-06 | 0,007323585 | 0,01076704  | 0,009285287 | 0,001085587 |
| Bacteria | Proteobacteria   | Alphaproteobacteria                 | Alphaproteobacteria_incertae_sedis  | Rhizomicrobium                      | 0           | 0           | 5,83041E-07 | 0           | 8,38176E-07 |
| Bacteria | Proteobacteria   | Alphaproteobacteria                 | Caulobacterales                     | Caulobacteraceae                    | 2,56583E-06 | 0           | 2,15041E-06 | 1,88706E-06 | 1,78427E-05 |
| Bacteria | Proteobacteria   | Alphaproteobacteria                 | Caulobacterales                     | Hyphomonadaceae                     | 0           | 0           | 0           | 3,47728E-07 | 0           |
| Bacteria | Proteobacteria   | Alphaproteobacteria                 | Kiloniellales                       | Kiloniellaceae                      | 0           | 0           | 0           | 2,20656E-05 | 0           |
| Bacteria | Proteobacteria   | Alphaproteobacteria                 | Rhizobiales                         | Aurantimonadaceae                   | 0           | 0           | 8,83564E-06 | 8,67864E-07 | 0           |
| Bacteria | Proteobacteria   | Alphaproteobacteria                 | Rhizobiales                         | Beijerinckiaceae                    | 0           | 0           | 3,15115E-06 | 7,26588E-07 | 4,11171E-06 |
| Bacteria | Proteobacteria   | Alphaproteobacteria                 | Rhizobiales                         | Bradyrhizobiaceae                   | 1,06165E-06 | 1,36064E-06 | 4,90262E-06 | 1,51478E-05 | 1,2638E-05  |
| Bacteria | Proteobacteria   | Alphaproteobacteria                 | Rhizobiales                         | Brucellaceae                        | 8,20734E-06 | 1,07943E-06 | 1,15968E-06 | 4,03688E-06 | 6,30366E-06 |

|                 |                       |                            |                          |                                         |  |             |             |             |             |             |
|-----------------|-----------------------|----------------------------|--------------------------|-----------------------------------------|--|-------------|-------------|-------------|-------------|-------------|
| <i>Bacteria</i> | <i>Proteobacteria</i> | <i>Alphaproteobacteria</i> | <i>Rhizobiales</i>       | <i>Hyphomicrobiaceae</i>                |  | 0           | 0           | 1,0588E-05  | 1,69077E-06 | 1,36355E-06 |
| <i>Bacteria</i> | <i>Proteobacteria</i> | <i>Alphaproteobacteria</i> | <i>Rhizobiales</i>       | <i>Methylobacteriaceae</i>              |  | 0           | 0           | 2,11412E-05 | 2,76533E-06 | 5,48613E-06 |
| <i>Bacteria</i> | <i>Proteobacteria</i> | <i>Alphaproteobacteria</i> | <i>Rhizobiales</i>       | <i>Methylocystaceae</i>                 |  | 0           | 0           | 4,59573E-07 | 5,56336E-07 | 0           |
| <i>Bacteria</i> | <i>Proteobacteria</i> | <i>Alphaproteobacteria</i> | <i>Rhizobiales</i>       | <i>Phyllobacteriaceae</i>               |  | 0           | 0           | 1,99838E-06 | 2,41776E-06 | 9,50151E-06 |
| <i>Bacteria</i> | <i>Proteobacteria</i> | <i>Alphaproteobacteria</i> | <i>Rhizobiales</i>       | <i>Rhizobiaceae</i>                     |  | 5,31328E-06 | 3,68468E-06 | 2,58125E-05 | 6,63572E-06 | 9,31254E-06 |
| <i>Bacteria</i> | <i>Proteobacteria</i> | <i>Alphaproteobacteria</i> | <i>Rhizobiales</i>       | <i>Rhodobiaceae</i>                     |  | 0           | 0           | 1,56282E-07 | 0           | 0           |
| <i>Bacteria</i> | <i>Proteobacteria</i> | <i>Alphaproteobacteria</i> | <i>Rhizobiales</i>       | <i>Xanthobacteraceae</i>                |  | 0           | 0           | 1,01589E-06 | 4,02996E-07 | 0           |
| <i>Bacteria</i> | <i>Proteobacteria</i> | <i>Alphaproteobacteria</i> | <i>Rhodobacterales</i>   | <i>Rhodobacteraceae</i>                 |  | 6,61382E-06 | 1,30262E-06 | 1,61849E-05 | 8,8341E-07  | 1,28221E-05 |
| <i>Bacteria</i> | <i>Proteobacteria</i> | <i>Alphaproteobacteria</i> | <i>Rhodospirillales</i>  | <i>Acetobacteraceae</i>                 |  | 2,24478E-06 | 1,22217E-06 | 1,70627E-05 | 4,33095E-07 | 1,79097E-05 |
| <i>Bacteria</i> | <i>Proteobacteria</i> | <i>Alphaproteobacteria</i> | <i>Rhodospirillales</i>  | <i>Rhodospirillaceae</i>                |  | 0,000519404 | 0,001545014 | 0,000332412 | 9,38372E-05 | 0,018000358 |
| <i>Bacteria</i> | <i>Proteobacteria</i> | <i>Alphaproteobacteria</i> | <i>Sphingomonadales</i>  | <i>Erythrobacteraceae</i>               |  | 2,31227E-06 | 0           | 8,27261E-07 | 1,29928E-06 | 8,635E-07   |
| <i>Bacteria</i> | <i>Proteobacteria</i> | <i>Alphaproteobacteria</i> | <i>Sphingomonadales</i>  | <i>Sphingomonadaceae</i>                |  | 6,10172E-06 | 2,66326E-06 | 3,88224E-05 | 0,000109177 | 3,43332E-05 |
| <i>Bacteria</i> | <i>Proteobacteria</i> | <i>Betaproteobacteria</i>  | <i>Burkholderiales</i>   | <i>Alcaligenaceae</i>                   |  | 1,15613E-06 | 0           | 9,06892E-06 | 0,000182285 | 3,09644E-05 |
| <i>Bacteria</i> | <i>Proteobacteria</i> | <i>Betaproteobacteria</i>  | <i>Burkholderiales</i>   | <i>Burkholderiaceae</i>                 |  | 0           | 1,14513E-06 | 9,69571E-06 | 1,70163E-06 | 2,06399E-05 |
| <i>Bacteria</i> | <i>Proteobacteria</i> | <i>Betaproteobacteria</i>  | <i>Burkholderiales</i>   | <i>Burkholderiales_incertaine_sedis</i> |  | 0           | 3,07042E-06 | 1,47771E-06 | 6,7568E-06  | 9,51866E-06 |
| <i>Bacteria</i> | <i>Proteobacteria</i> | <i>Betaproteobacteria</i>  | <i>Burkholderiales</i>   | <i>Comamonadaceae</i>                   |  | 6,01126E-06 | 4,74594E-06 | 1,78073E-05 | 6,39482E-06 | 4,94657E-05 |
| <i>Bacteria</i> | <i>Proteobacteria</i> | <i>Betaproteobacteria</i>  | <i>Burkholderiales</i>   | <i>Oxalobacteraceae</i>                 |  | 4,61894E-06 | 0,001342538 | 0,001270138 | 0,001200895 | 1,12958E-05 |
| <i>Bacteria</i> | <i>Proteobacteria</i> | <i>Betaproteobacteria</i>  | <i>Burkholderiales</i>   | <i>Sutterellaceae</i>                   |  | 0,004290141 | 0,002097645 | 0,000297244 | 0,000167927 | 0,008069616 |
| <i>Bacteria</i> | <i>Proteobacteria</i> | <i>Betaproteobacteria</i>  | <i>Hydrogenophilales</i> | <i>Hydrogenophilaceae</i>               |  | 0           | 0           | 0           | 2,16547E-07 | 0           |
| <i>Bacteria</i> | <i>Proteobacteria</i> | <i>Betaproteobacteria</i>  | <i>Methylophilales</i>   | <i>Methylophilaceae</i>                 |  | 0           | 0           | 7,74293E-06 | 1,15619E-06 | 0           |

|                 |                       |                              |                           |                            |  |                 |                 |                 |                 |                 |
|-----------------|-----------------------|------------------------------|---------------------------|----------------------------|--|-----------------|-----------------|-----------------|-----------------|-----------------|
| <i>Bacteria</i> | <i>Proteobacteria</i> | <i>Betaproteobacteria</i>    | <i>Neisseriales</i>       | <i>Neisseriaceae</i>       |  | 2,80998<br>E-06 | 3,32911E-<br>06 | 0,00018<br>2356 | 7,1367E<br>-06  | 5,1524E-<br>05  |
| <i>Bacteria</i> | <i>Proteobacteria</i> | <i>Betaproteobacteria</i>    | <i>Rhodocyclales</i>      | <i>Rhodocyclaceae</i>      |  | 0               | 0               | 4,56803<br>E-07 | 2,89334<br>E-06 | 2,53985E<br>-06 |
| <i>Bacteria</i> | <i>Proteobacteria</i> | <i>Deltaproteobacteria</i>   | <i>Bdellovibrionales</i>  | <i>Bacteriovoraceae</i>    |  | 0               | 0               | 1,66935<br>E-07 | 0               | 4,11171E<br>-06 |
| <i>Bacteria</i> | <i>Proteobacteria</i> | <i>Deltaproteobacteria</i>   | <i>Bdellovibrionales</i>  | <i>Bdellovibrionaceae</i>  |  | 0,01159<br>0715 | 0,0057469<br>42 | 0,00491<br>6348 | 0,00583<br>9097 | 0,019362<br>328 |
| <i>Bacteria</i> | <i>Proteobacteria</i> | <i>Deltaproteobacteria</i>   | <i>Desulfobacterales</i>  | <i>Desulfobacteraceae</i>  |  | 0               | 4,39721E-<br>06 | 2,10239<br>E-05 | 0,00069<br>1621 | 4,19088E<br>-07 |
| <i>Bacteria</i> | <i>Proteobacteria</i> | <i>Deltaproteobacteria</i>   | <i>Desulfobacterales</i>  | <i>Desulfobulbaceae</i>    |  | 0               | 0               | 0               | 6,95456<br>E-07 | 0               |
| <i>Bacteria</i> | <i>Proteobacteria</i> | <i>Deltaproteobacteria</i>   | <i>Desulfovibrionales</i> | <i>Desulfohalobiaceae</i>  |  | 0               | 1,07943E-<br>06 | 4,97911<br>E-06 | 0               | 0               |
| <i>Bacteria</i> | <i>Proteobacteria</i> | <i>Deltaproteobacteria</i>   | <i>Desulfovibrionales</i> | <i>Desulfomicrobiaceae</i> |  | 0               | 2,52479E-<br>06 | 0               | 2,38682<br>E-06 | 0               |
| <i>Bacteria</i> | <i>Proteobacteria</i> | <i>Deltaproteobacteria</i>   | <i>Desulfovibrionales</i> | <i>Desulfovibrionaceae</i> |  | 0,00083<br>3182 | 0,0029781<br>55 | 0,00327<br>7759 | 0,00166<br>5183 | 0,002000<br>912 |
| <i>Bacteria</i> | <i>Proteobacteria</i> | <i>Deltaproteobacteria</i>   | <i>Desulfuromonadales</i> | <i>Geobacteraceae</i>      |  | 0               | 0               | 1,15357<br>E-06 | 3,23593<br>E-07 | 0               |
| <i>Bacteria</i> | <i>Proteobacteria</i> | <i>Deltaproteobacteria</i>   | <i>Myxococcales</i>       | <i>Cystobacteraceae</i>    |  | 0               | 0               | 5,2948E<br>-07  | 0,00013<br>3073 | 0               |
| <i>Bacteria</i> | <i>Proteobacteria</i> | <i>Deltaproteobacteria</i>   | <i>Myxococcales</i>       | <i>Kofleriaceae</i>        |  | 0               | 0               | 3,12565<br>E-07 | 0               | 0               |
| <i>Bacteria</i> | <i>Proteobacteria</i> | <i>Deltaproteobacteria</i>   | <i>Myxococcales</i>       | <i>Myxococcaceae</i>       |  | 0               | 0               | 0               | 5,78093<br>E-07 | 1,00009E<br>-06 |
| <i>Bacteria</i> | <i>Proteobacteria</i> | <i>Deltaproteobacteria</i>   | <i>Myxococcales</i>       | <i>Nannocystaceae</i>      |  | 0               | 0               | 1,27464<br>E-07 | 0               | 0               |
| <i>Bacteria</i> | <i>Proteobacteria</i> | <i>Deltaproteobacteria</i>   | <i>Myxococcales</i>       | <i>Phaselicystidaceae</i>  |  | 0               | 0               | 1,29646<br>E-06 | 0               | 0               |
| <i>Bacteria</i> | <i>Proteobacteria</i> | <i>Deltaproteobacteria</i>   | <i>Myxococcales</i>       | <i>Polyangiaceae</i>       |  | 0               | 0               | 8,51877<br>E-07 | 0               | 0               |
| <i>Bacteria</i> | <i>Proteobacteria</i> | <i>Epsilonproteobacteria</i> | <i>Campylobacterales</i>  | <i>Campylobacteraceae</i>  |  | 1,41169<br>E-05 | 0,0038202<br>61 | 0,00054<br>5093 | 0,00812<br>2387 | 5,87048E<br>-05 |
| <i>Bacteria</i> | <i>Proteobacteria</i> | <i>Epsilonproteobacteria</i> | <i>Campylobacterales</i>  | <i>Helicobacteraceae</i>   |  | 8,35086<br>E-07 | 0,0003163<br>26 | 0,00020<br>6677 | 0,00069<br>4006 | 0               |
| <i>Bacteria</i> | <i>Proteobacteria</i> | <i>Epsilonproteobacteria</i> | <i>Campylobacterales</i>  | <i>Hydrogenimonaceae</i>   |  | 0               | 0               | 1,80215<br>E-07 | 0               | 0               |
| <i>Bacteria</i> | <i>Proteobacteria</i> | <i>Gammaproteobacteria</i>   | <i>Aeromonadales</i>      | <i>Aeromonadaceae</i>      |  | 7,38594<br>E-07 | 0               | 1,80215<br>E-07 | 4,53045<br>E-06 | 0               |

|          |                |                             |                             |                             |  |             |             |             |             |             |
|----------|----------------|-----------------------------|-----------------------------|-----------------------------|--|-------------|-------------|-------------|-------------|-------------|
| Bacteria | Proteobacteria | Gammaproteobacteria         | Aeromonadales               | Succinivibrionaceae         |  | 2,6075E-06  | 0,003687507 | 0,003683549 | 0,001393893 | 0,003306048 |
| Bacteria | Proteobacteria | Gammaproteobacteria         | Alteromonadales             | Alteromonadaceae            |  | 0           | 0           | 1,80215E-07 | 6,2012E-07  | 0           |
| Bacteria | Proteobacteria | Gammaproteobacteria         | Alteromonadales             | Shewanellaceae              |  | 0           | 0           | 0           | 8,35554E-07 | 0           |
| Bacteria | Proteobacteria | Gammaproteobacteria         | Candidatus Carsonella       | Candidatus Carsonella       |  | 9,43072E-06 | 2,60525E-06 | 1,48739E-06 | 0           | 0           |
| Bacteria | Proteobacteria | Gammaproteobacteria         | Cardiobacteriales           | Cardiobacteriaceae          |  | 0           | 0           | 6,54926E-07 | 0           | 1,25726E-06 |
| Bacteria | Proteobacteria | Gammaproteobacteria         | Chromatiales                | Ectothiorhodospiraceae      |  | 0           | 0           | 2,49322E-07 | 0           | 0           |
| Bacteria | Proteobacteria | Gammaproteobacteria         | Enterobacteriales           | Enterobacteriaceae          |  | 0,000905198 | 0,00050358  | 0,028481597 | 0,000918235 | 0,002410403 |
| Bacteria | Proteobacteria | Gammaproteobacteria         | Legionellales               | Coxiellaceae                |  | 0           | 0           | 1,26676E-06 | 0,000110221 | 2,55251E-06 |
| Bacteria | Proteobacteria | Gammaproteobacteria         | Legionellales               | Legionellaceae              |  | 0           | 1,30262E-06 | 4,31831E-07 | 0           | 0           |
| Bacteria | Proteobacteria | Gammaproteobacteria         | Orbales                     | Orbaceae                    |  | 0           | 0           | 1,91197E-06 | 0           | 0           |
| Bacteria | Proteobacteria | Gammaproteobacteria         | Pasteurellales              | Pasteurellaceae             |  | 6,62708E-05 | 8,77891E-06 | 0,00024449  | 3,02386E-05 | 0,001064204 |
| Bacteria | Proteobacteria | Gammaproteobacteria         | Pseudomonadales             | Pseudomonadaceae            |  | 3,8817E-06  | 4,92833E-06 | 5,73755E-06 | 2,28908E-05 | 2,95197E-05 |
| Bacteria | Proteobacteria | Gammaproteobacteria         | Vibrionales                 | Vibrionaceae                |  | 0           | 0           | 0           | 0           | 1,50014E-06 |
| Bacteria | Proteobacteria | Gammaproteobacteria         | Xanthomonadales             | Sinobacteraceae             |  | 0           | 9,61809E-07 | 3,52987E-07 | 0           | 0           |
| Bacteria | Proteobacteria | Gammaproteobacteria         | Xanthomonadales             | Xanthomonadaceae            |  | 2,1233E-06  | 3,40957E-06 | 1,12561E-05 | 1,40088E-05 | 3,22392E-05 |
| Bacteria | SRI            | SRI_genera_incertaine_sedis | SRI_genera_incertaine_sedis | SRI_genera_incertaine_sedis |  | 0           | 0           | 1,41073E-05 | 0,0004425   | 0           |
| Bacteria | Spirochaetes   | Spirochaetia                | Spirochaetales              | Spirochaetaceae             |  | 8,21604E-06 | 0,024454153 | 0,030379064 | 0,026480042 | 0,041468533 |
| Bacteria | Synergistetes  | Synergistia                 | Synergistales               | Synergistaceae              |  | 6,8467E-07  | 0,000992028 | 4,27386E-05 | 0,000601401 | 0,001769282 |
| Bacteria | Tenericutes    | Mollicutes                  | Acholeplasmatales           | Acholeplasmataceae          |  | 0,000522859 | 6,47658E-06 | 6,06724E-05 | 0,000126821 | 0,00804251  |
| Bacteria | Tenericutes    | Mollicutes                  | Anaeroplasmatales           | Anaeroplasmataceae          |  | 0,002411235 | 0,001194081 | 0,00091422  | 0,002240633 | 0,01191534  |



|          |                                 |                                    |                                             |                                             |  |             |             |             |             |             |
|----------|---------------------------------|------------------------------------|---------------------------------------------|---------------------------------------------|--|-------------|-------------|-------------|-------------|-------------|
| Bacteria | <i>Tenericutes</i>              | <i>Mollicutes</i>                  | <i>Haloplasmatales</i>                      | <i>Haloplasmataceae</i>                     |  | 0           | 0           | 0           | 0           | 1,25726E-06 |
| Bacteria | <i>Tenericutes</i>              | <i>Mollicutes</i>                  | <i>Mycoplasmatales</i>                      | <i>Mycoplasmataceae</i>                     |  | 7,38594E-07 | 0           | 6,63663E-05 | 7,30395E-05 | 0,000460551 |
| Bacteria | <i>Verrucomicrobia</i>          | <i>Opitutae</i>                    | <i>Opitiales</i>                            | <i>Opitutaceae</i>                          |  | 1,15613E-06 | 0           | 5,78172E-07 | 0           | 1,00009E-06 |
| Bacteria | <i>Verrucomicrobia</i>          | <i>Opitutae</i>                    | <i>Puniceicoccales</i>                      | <i>Puniceicoccaceae</i>                     |  | 6,67592E-05 | 0,000618422 | 0,000357573 | 2,21597E-05 | 0,000389671 |
| Bacteria | <i>Verrucomicrobia</i>          | <i>Spartobacteria</i>              | <i>Spartobacteria_genera_incertae_sedis</i> | <i>Spartobacteria_genera_incertae_sedis</i> |  | 2,31227E-06 | 0           | 2,32559E-06 | 4,0574E-06  | 1,32809E-05 |
| Bacteria | <i>Verrucomicrobia</i>          | <i>Spartobacteria</i>              | <i>Xiphinematobacter</i>                    | <i>Xiphinematobacter</i>                    |  | 0           | 0           | 6,18624E-07 | 0           | 0           |
| Bacteria | <i>Verrucomicrobia</i>          | <i>Subdivision3</i>                | <i>Subdivision3_genera_incertae_sedis</i>   | <i>Subdivision3_genera_incertae_sedis</i>   |  | 0           | 1,14513E-06 | 7,81412E-07 | 0           | 0           |
| Bacteria | <i>Verrucomicrobia</i>          | <i>Subdivision5</i>                | <i>Subdivision5_genera_incertae_sedis</i>   | <i>Subdivision5_genera_incertae_sedis</i>   |  | 1,38952E-06 | 0,006002729 | 0,004541873 | 0,020351255 | 0,001349141 |
| Bacteria | <i>Verrucomicrobia</i>          | <i>Verrucomicrobiae</i>            | <i>Verrucomicrobiales</i>                   | <i>Verrucomicrobiaceae</i>                  |  | 0,001670242 | 0,002463152 | 0,010415019 | 1,51586E-05 | 9,9488E-06  |
| Bacteria | <i>candidate division WPS-1</i> | <i>WPS-1_genera_incertae_sedis</i> | <i>WPS-1_genera_incertae_sedis</i>          | <i>WPS-1_genera_incertae_sedis</i>          |  | 1,08774E-06 | 0           | 3,5999E-06  | 0           | 0           |
| Bacteria | <i>candidate division WPS-2</i> | <i>WPS-2_genera_incertae_sedis</i> | <i>WPS-2_genera_incertae_sedis</i>          | <i>WPS-2_genera_incertae_sedis</i>          |  | 0           | 0           | 3,52987E-07 | 0           | 0           |
| Archaea  | <i>Euryarchaeota</i>            | <i>Methanobacteria</i>             | <i>Methanobacteriales</i>                   |                                             |  | 0           | 0,001810226 | 0,005324131 | 0,000219484 | 1,30821E-05 |
| Archaea  | <i>Euryarchaeota</i>            | <i>Thermoplasmata</i>              | <i>Thermoplasmatales</i>                    |                                             |  | 0           | 0,000532381 | 3,2605E-05  | 9,04343E-05 | 0,000323092 |
| Bacteria | <i>Acidobacteria</i>            | <i>Acidobacteria_Gp1</i>           | <i>Candidatus Koribacter</i>                |                                             |  | 0           | 0           | 1,92029E-07 | 6,2012E-07  | 0           |
| Bacteria | <i>Acidobacteria</i>            | <i>Acidobacteria_Gp1</i>           | <i>Edaphobacter</i>                         |                                             |  | 0           | 0           | 4,65595E-07 | 0           | 0           |
| Bacteria | <i>Acidobacteria</i>            | <i>Acidobacteria_Gp1</i>           | <i>Gp1</i>                                  |                                             |  | 0           | 0           | 9,37695E-07 | 0           | 0           |
| Bacteria | <i>Acidobacteria</i>            | <i>Acidobacteria_Gp1</i>           | <i>Granulicella</i>                         |                                             |  | 0           | 0           | 0           | 5,78093E-07 | 0           |
| Bacteria | <i>Acidobacteria</i>            | <i>Acidobacteria_Gp1</i>           | <i>Terriglobus</i>                          |                                             |  | 0           | 0           | 0           | 1,15619E-06 | 0           |
| Bacteria | <i>Acidobacteria</i>            | <i>Acidobacteria_Gp16</i>          | <i>Gp16</i>                                 |                                             |  | 0           | 0           | 1,10742E-06 | 0           | 8,635E-07   |

|                 |                        |                                      |                                   |  |  |             |             |             |             |             |
|-----------------|------------------------|--------------------------------------|-----------------------------------|--|--|-------------|-------------|-------------|-------------|-------------|
| <i>Bacteria</i> | <i>Acidobacteria</i>   | <i>Acidobacteria_Gp2</i>             | <i>Gp2</i>                        |  |  | 0           | 0           | 8,7086E-07  | 0           | 1,55733E-05 |
| <i>Bacteria</i> | <i>Acidobacteria</i>   | <i>Acidobacteria_Gp3</i>             | <i>Gp3</i>                        |  |  | 0           | 0           | 9,698E-07   | 5,56336E-07 | 0           |
| <i>Bacteria</i> | <i>Acidobacteria</i>   | <i>Acidobacteria_Gp4</i>             | <i>Blastocatella</i>              |  |  | 0           | 0           | 8,82467E-07 | 6,49642E-07 | 0           |
| <i>Bacteria</i> | <i>Acidobacteria</i>   | <i>Acidobacteria_Gp4</i>             | <i>Gp4</i>                        |  |  | 6,51926E-06 | 0           | 2,17315E-06 | 8,46107E-07 | 0           |
| <i>Bacteria</i> | <i>Acidobacteria</i>   | <i>Acidobacteria_Gp6</i>             | <i>Gp6</i>                        |  |  | 2,31227E-06 | 0           | 5,80644E-06 | 0           | 0           |
| <i>Bacteria</i> | <i>Acidobacteria</i>   | <i>Acidobacteria_Gp7</i>             | <i>Gp7</i>                        |  |  | 0           | 0           | 7,53505E-07 | 4,50315E-07 | 0           |
| <i>Bacteria</i> | <i>Actinobacteria</i>  | <i>Actinobacteria</i>                | <i>Acidimicrobiales</i>           |  |  | 6,84232E-06 | 0           | 2,68973E-06 | 5,81193E-07 | 2,92278E-06 |
| <i>Bacteria</i> | <i>Actinobacteria</i>  | <i>Actinobacteria</i>                | <i>Actinomycetales</i>            |  |  | 0,000104593 | 8,40193E-05 | 0,000481324 | 0,004471199 | 0,000535434 |
| <i>Bacteria</i> | <i>Actinobacteria</i>  | <i>Actinobacteria</i>                | <i>Bifidobacteriales</i>          |  |  | 0           | 2,201E-05   | 0,001364881 | 0           | 0,00022456  |
| <i>Bacteria</i> | <i>Actinobacteria</i>  | <i>Actinobacteria</i>                | <i>Coriobacteriales</i>           |  |  | 0,000756844 | 0,001146768 | 0,005768236 | 0,00192916  | 0,001054867 |
| <i>Bacteria</i> | <i>Actinobacteria</i>  | <i>Actinobacteria</i>                | <i>Euzebyales</i>                 |  |  | 0           | 0           | 3,52987E-07 | 0           | 0           |
| <i>Bacteria</i> | <i>Actinobacteria</i>  | <i>Actinobacteria</i>                | <i>Gaiellales</i>                 |  |  | 0           | 0           | 2,32654E-06 | 1,74562E-06 | 2,02595E-06 |
| <i>Bacteria</i> | <i>Actinobacteria</i>  | <i>Actinobacteria</i>                | <i>Rubrobacterales</i>            |  |  | 1,08774E-06 | 1,30262E-06 | 1,61254E-06 | 3,3313E-06  | 1,84938E-05 |
| <i>Bacteria</i> | <i>Actinobacteria</i>  | <i>Actinobacteria</i>                | <i>Solirubrobacterales</i>        |  |  | 1,15613E-06 | 0           | 3,44622E-06 | 2,68182E-06 | 0           |
| <i>Bacteria</i> | <i>Actinobacteria</i>  | <i>Thermoleophilia</i>               | <i>Thermoleophilales</i>          |  |  | 0           | 0           | 1,36693E-06 | 0           | 2,15875E-06 |
| <i>Bacteria</i> | <i>Armatimonadetes</i> | <i>Armatimonadetes_gp4</i>           | <i>Armatimonadetes_gp4</i>        |  |  | 0           | 0           | 3,85448E-07 | 0           | 0           |
| <i>Bacteria</i> | <i>Armatimonadetes</i> | <i>Armatimonadetes_gp5</i>           | <i>Armatimonadetes_gp5</i>        |  |  | 0           | 0           | 4,56803E-07 | 2,16547E-07 | 0           |
| <i>Bacteria</i> | <i>Armatimonadetes</i> | <i>Armatimonadia</i>                 | <i>Armatimonadales</i>            |  |  | 0           | 0           | 5,2948E-07  | 0           | 0           |
| <i>Bacteria</i> | <i>Armatimonadetes</i> | <i>Chthonomonadetes</i>              | <i>Chthonomonadales</i>           |  |  | 0           | 0           | 2,8157E-07  | 0           | 0           |
| <i>Bacteria</i> | <i>BRC1</i>            | <i>BRC1_genera_incertainae_sedis</i> | <i>BRC1_genera_incertae_sedis</i> |  |  | 0           | 0           | 0           | 2,16547E-07 | 0           |

|          |                             |                                        |                                        |  |  |             |             |             |             |             |
|----------|-----------------------------|----------------------------------------|----------------------------------------|--|--|-------------|-------------|-------------|-------------|-------------|
| Bacteria | Bacteroidetes               | Bacteroidetes"_incertae_sedis          | Mariniflum                             |  |  | 0           | 0           | 0           | 0           | 4,3175E-07  |
| Bacteria | Bacteroidetes               | Bacteroidetes"_incertae_sedis          | Ohtaekwangia                           |  |  | 2,31227E-06 | 0           | 1,05189E-06 | 0           | 0           |
| Bacteria | Bacteroidetes               | Bacteroidetes"_incertae_sedis          | Prolixibacter                          |  |  | 0           | 1,4956E-05  | 4,60037E-06 | 1,47076E-05 | 0           |
| Bacteria | Bacteroidetes               | Bacteroidia                            | Bacteroidales                          |  |  | 0,290746039 | 0,33988478  | 0,280910854 | 0,288149096 | 0,229883752 |
| Bacteria | Bacteroidetes               | Cytophagia                             | Cytophagales                           |  |  | 2,52547E-06 | 1,26195E-05 | 1,19124E-05 | 5,98303E-05 | 2,41927E-06 |
| Bacteria | Bacteroidetes               | Flavobacteriia                         | Flavobacteriales                       |  |  | 1,38899E-05 | 0,00920804  | 0,011573752 | 0,017043473 | 0,007180883 |
| Bacteria | Bacteroidetes               | Sphingobacteriia                       | Sphingobacteriales                     |  |  | 1,38667E-05 | 0,015260894 | 0,004552561 | 0,026804329 | 5,0705E-05  |
| Bacteria | Candidatus Saccharibacteria | Saccharibacteria_genera_incertae_sedis | Saccharibacteria_genera_incertae_sedis |  |  | 1,99122E-06 | 7,69525E-05 | 0,00053016  | 0,002204092 | 0,000102494 |
| Bacteria | Chlamydiae                  | Chlamydiia                             | Chlamydiales                           |  |  | 0           | 0,00069837  | 2,98652E-06 | 0,000768975 | 1,25726E-06 |
| Bacteria | Chloroflexi                 | Anaerolineae                           | Anaerolineales                         |  |  | 0           | 0           | 1,76493E-07 | 0,000191085 | 4,38417E-06 |
| Bacteria | Chloroflexi                 | Caldilineae                            | Caldilineales                          |  |  | 5,78067E-06 | 0           | 0           | 0           | 0           |
| Bacteria | Chloroflexi                 | Chloroflexia                           | Chloroflexales                         |  |  | 0           | 0           | 3,52987E-07 | 0           | 4,3175E-07  |
| Bacteria | Chloroflexi                 | Thermomicrobia                         | Sphaerobacterales                      |  |  | 3,4684E-06  | 0           | 1,36342E-05 | 2,16547E-07 | 0           |
| Bacteria | Cyanobacteria/Chloroplast   | Chloroplast                            | Chloroplast                            |  |  | 3,94789E-06 | 1,03565E-05 | 0,001322938 | 3,93451E-05 | 3,27429E-05 |
| Bacteria | Cyanobacteria/Chloroplast   | Cyanobacteria                          | Family II                              |  |  | 0           | 0           | 0           | 8,20773E-07 | 0           |
| Bacteria | Cyanobacteria/Chloroplast   | Cyanobacteria                          | Family XIII                            |  |  | 0           | 0           | 1,56282E-07 | 4,33095E-07 | 0           |
| Bacteria | Deferribacteres             | Deferribacteres                        | Deferribacterales                      |  |  | 0           | 5,59831E-05 | 5,09107E-05 | 0,000582846 | 0           |
| Bacteria | Deinococcus-Thermus         | Deinococci                             | Deinococcales                          |  |  | 3,4684E-06  | 0           | 1,80215E-07 | 4,70618E-07 | 8,635E-07   |
| Bacteria | Deinococcus-Thermus         | Deinococci                             | Thermales                              |  |  | 0           | 0           | 0           | 2,89771E-07 | 2,15875E-06 |

|                 |                              |                                                 |                                                 |  |  |                 |                 |                 |                 |                 |
|-----------------|------------------------------|-------------------------------------------------|-------------------------------------------------|--|--|-----------------|-----------------|-----------------|-----------------|-----------------|
| <i>Bacteria</i> | <i>Elusimicrobia</i>         | <i>Elusimicrobia</i>                            | <i>Elusimicrobiales</i>                         |  |  | 0,00673<br>0554 | 0,0018705<br>05 | 0,00032<br>8789 | 0               | 0,008924<br>486 |
| <i>Bacteria</i> | <i>Fibrobacteres</i>         | <i>Fibrobacteria</i>                            | <i>Fibrobacterales</i>                          |  |  | 0               | 0,0007466<br>76 | 0,00226<br>435  | 0,00128<br>398  | 0,000893<br>402 |
| <i>Bacteria</i> | <i>Firmicutes</i>            | <i>Bacilli</i>                                  | <i>Bacillales</i>                               |  |  | 3,17014<br>E-05 | 0,0135804<br>99 | 0,01971<br>9812 | 0,00696<br>7404 | 0,005469<br>463 |
| <i>Bacteria</i> | <i>Firmicutes</i>            | <i>Bacilli</i>                                  | <i>Lactobacillales</i>                          |  |  | 0,00091<br>8568 | 0,0089390<br>34 | 0,01297<br>6297 | 0,00103<br>845  | 0,002042<br>462 |
| <i>Bacteria</i> | <i>Firmicutes</i>            | <i>Clostridia</i>                               | <i>Clostridiales</i>                            |  |  | 0,62918<br>3636 | 0,4243021<br>99 | 0,47020<br>051  | 0,42082<br>8574 | 0,543203<br>645 |
| <i>Bacteria</i> | <i>Firmicutes</i>            | <i>Clostridia</i>                               | <i>Thermoanaerobacter<br/>ales</i>              |  |  | 0               | 0               | 1,56282<br>E-07 | 1,23561<br>E-06 | 0               |
| <i>Bacteria</i> | <i>Firmicutes</i>            | <i>Erysipelotrichia</i>                         | <i>Erysipelotrichales</i>                       |  |  | 0,01248<br>2446 | 0,0059301<br>06 | 0,01118<br>7702 | 0,02108<br>2713 | 0,015911<br>62  |
| <i>Bacteria</i> | <i>Firmicutes</i>            | <i>Negativicutes</i>                            | <i>Selenomonadales</i>                          |  |  | 0,01501<br>4763 | 0,0430811<br>54 | 0,03162<br>7344 | 0,05873<br>4824 | 0,007685<br>603 |
| <i>Bacteria</i> | <i>Fusobacteria</i>          | <i>Fusobacteriia</i>                            | <i>Fusobacteriales</i>                          |  |  | 1,7675E<br>-06  | 6,99645E-<br>06 | 0,00051<br>0223 | 6,70056<br>E-05 | 5,53898E<br>-05 |
| <i>Bacteria</i> | <i>Gemmatimonad<br/>etes</i> | <i>Gemmatimonadetes</i>                         | <i>Gemmatimonadales</i>                         |  |  | 0               | 0               | 6,20688<br>E-06 | 2,12386<br>E-06 | 8,22341E<br>-07 |
| <i>Bacteria</i> | <i>Lentisphaerae</i>         | <i>Lentisphaeria</i>                            | <i>Victivallales</i>                            |  |  | 4,46225<br>E-05 | 0,0002712<br>46 | 7,11297<br>E-05 | 5,70807<br>E-06 | 9,84705E<br>-05 |
| <i>Bacteria</i> | <i>Lentisphaerae</i>         | <i>Oligosphaeria</i>                            | <i>Oligosphaerales</i>                          |  |  | 0               | 5,69725E-<br>06 | 2,11151<br>E-06 | 2,77339<br>E-06 | 0               |
| <i>Bacteria</i> | <i>Nitrospirae</i>           | <i>Nitrospira</i>                               | <i>Nitrospirales</i>                            |  |  | 0               | 0               | 2,1459E<br>-06  | 0               | 0               |
| <i>Bacteria</i> | <i>Parcubacteria</i>         | <i>Parcubacteria_genera_<br/>incertae_sedis</i> | <i>Parcubacteria_gene<br/>ra_incertae_sedis</i> |  |  | 0               | 0               | 6,24915<br>E-07 | 4,02996<br>E-07 | 5,61184E<br>-06 |
| <i>Bacteria</i> | <i>Planctomycetes</i>        | <i>Planctomycetia</i>                           | <i>Planctomycetales</i>                         |  |  | 4,62453<br>E-06 | 0,0073235<br>85 | 0,01076<br>704  | 0,00928<br>5287 | 0,001085<br>587 |
| <i>Bacteria</i> | <i>Proteobacteria</i>        | <i>Alphaproteobacteria</i>                      | <i>Alphaproteobacteria<br/>incertae_sedis</i>   |  |  | 0               | 0               | 5,83041<br>E-07 | 0               | 8,38176E<br>-07 |
| <i>Bacteria</i> | <i>Proteobacteria</i>        | <i>Alphaproteobacteria</i>                      | <i>Caulobacterales</i>                          |  |  | 2,56583<br>E-06 | 0               | 2,15041<br>E-06 | 2,23479<br>E-06 | 1,78427E<br>-05 |
| <i>Bacteria</i> | <i>Proteobacteria</i>        | <i>Alphaproteobacteria</i>                      | <i>Kiloniellales</i>                            |  |  | 0               | 0               | 0               | 2,20656<br>E-05 | 0               |
| <i>Bacteria</i> | <i>Proteobacteria</i>        | <i>Alphaproteobacteria</i>                      | <i>Rhizobiales</i>                              |  |  | 1,45823<br>E-05 | 7,30408E-<br>06 | 0,00010<br>3458 | 3,68598<br>E-05 | 5,01784E<br>-05 |
| <i>Bacteria</i> | <i>Proteobacteria</i>        | <i>Alphaproteobacteria</i>                      | <i>Rhodobacterales</i>                          |  |  | 6,61382<br>E-06 | 1,30262E-<br>06 | 1,61849<br>E-05 | 8,8341E<br>-07  | 1,28221E<br>-05 |

|                 |                       |                              |                                  |  |  |                 |                 |                 |                 |                 |
|-----------------|-----------------------|------------------------------|----------------------------------|--|--|-----------------|-----------------|-----------------|-----------------|-----------------|
| <i>Bacteria</i> | <i>Proteobacteria</i> | <i>Alphaproteobacteria</i>   | <i>Rhodospirillales</i>          |  |  | 0,00141<br>2539 | 0,0021167<br>82 | 0,00038<br>7044 | 0,00039<br>0195 | 0,018879<br>48  |
| <i>Bacteria</i> | <i>Proteobacteria</i> | <i>Alphaproteobacteria</i>   | <i>Rickettsiales</i>             |  |  | 0               | 0               | 1,56282<br>E-07 | 0               | 0               |
| <i>Bacteria</i> | <i>Proteobacteria</i> | <i>Alphaproteobacteria</i>   | <i>Sphingomonadales</i>          |  |  | 8,41399<br>E-06 | 2,66326E-<br>06 | 4,00027<br>E-05 | 0,00011<br>1417 | 3,73888E<br>-05 |
| <i>Bacteria</i> | <i>Proteobacteria</i> | <i>Betaproteobacteria</i>    | <i>Burkholderiales</i>           |  |  | 0,00431<br>9317 | 0,0036857<br>03 | 0,00161<br>6321 | 0,00180<br>1367 | 0,008208<br>058 |
| <i>Bacteria</i> | <i>Proteobacteria</i> | <i>Betaproteobacteria</i>    | <i>Hydrogenophilales</i>         |  |  | 0               | 0               | 0               | 2,16547<br>E-07 | 0               |
| <i>Bacteria</i> | <i>Proteobacteria</i> | <i>Betaproteobacteria</i>    | <i>Methylophilales</i>           |  |  | 0               | 0               | 7,74293<br>E-06 | 1,15619<br>E-06 | 0               |
| <i>Bacteria</i> | <i>Proteobacteria</i> | <i>Betaproteobacteria</i>    | <i>Neisseriales</i>              |  |  | 2,80998<br>E-06 | 3,32911E-<br>06 | 0,00018<br>2356 | 7,1367E<br>-06  | 5,1524E-<br>05  |
| <i>Bacteria</i> | <i>Proteobacteria</i> | <i>Betaproteobacteria</i>    | <i>Rhodocyclales</i>             |  |  | 0               | 0               | 4,56803<br>E-07 | 2,89334<br>E-06 | 2,53985E<br>-06 |
| <i>Bacteria</i> | <i>Proteobacteria</i> | <i>Deltaproteobacteria</i>   | <i>Bdellovibrionales</i>         |  |  | 0,01159<br>0715 | 0,0057469<br>42 | 0,00491<br>684  | 0,00584<br>0964 | 0,019366<br>439 |
| <i>Bacteria</i> | <i>Proteobacteria</i> | <i>Deltaproteobacteria</i>   | <i>Desulfobacterales</i>         |  |  | 0               | 4,39721E-<br>06 | 2,10239<br>E-05 | 0,00069<br>2971 | 4,19088E<br>-07 |
| <i>Bacteria</i> | <i>Proteobacteria</i> | <i>Deltaproteobacteria</i>   | <i>Desulfovibrionales</i>        |  |  | 0,00083<br>6348 | 0,0029901<br>03 | 0,00329<br>4146 | 0,00167<br>2549 | 0,002000<br>912 |
| <i>Bacteria</i> | <i>Proteobacteria</i> | <i>Deltaproteobacteria</i>   | <i>Desulfuromonadales</i>        |  |  | 0               | 0               | 1,15357<br>E-06 | 3,23593<br>E-07 | 0               |
| <i>Bacteria</i> | <i>Proteobacteria</i> | <i>Deltaproteobacteria</i>   | <i>Myxococcales</i>              |  |  | 0               | 0               | 4,05651<br>E-06 | 0,00013<br>4721 | 1,00009E<br>-06 |
| <i>Bacteria</i> | <i>Proteobacteria</i> | <i>Epsilonproteobacteria</i> | <i>Campylobacterales</i>         |  |  | 1,4952E<br>-05  | 0,0041468<br>72 | 0,00075<br>2416 | 0,00882<br>9858 | 5,87048E<br>-05 |
| <i>Bacteria</i> | <i>Proteobacteria</i> | <i>Gammaproteobacteria</i>   | <i>Aeromonadales</i>             |  |  | 3,34609<br>E-06 | 0,0036875<br>07 | 0,00368<br>3729 | 0,00139<br>8424 | 0,003306<br>048 |
| <i>Bacteria</i> | <i>Proteobacteria</i> | <i>Gammaproteobacteria</i>   | <i>Alteromonadales</i>           |  |  | 0               | 0               | 1,80215<br>E-07 | 1,45567<br>E-06 | 0               |
| <i>Bacteria</i> | <i>Proteobacteria</i> | <i>Gammaproteobacteria</i>   | <i>Candidatus<br/>Carsonella</i> |  |  | 9,43072<br>E-06 | 2,60525E-<br>06 | 1,48739<br>E-06 | 0               | 0               |
| <i>Bacteria</i> | <i>Proteobacteria</i> | <i>Gammaproteobacteria</i>   | <i>Cardiobacteriales</i>         |  |  | 0               | 0               | 6,54926<br>E-07 | 0               | 1,25726E<br>-06 |
| <i>Bacteria</i> | <i>Proteobacteria</i> | <i>Gammaproteobacteria</i>   | <i>Chromatiales</i>              |  |  | 0               | 0               | 2,49322<br>E-07 | 0               | 0               |
| <i>Bacteria</i> | <i>Proteobacteria</i> | <i>Gammaproteobacteria</i>   | <i>Enterobacteriales</i>         |  |  | 0,00090<br>5198 | 0,0005035<br>8  | 0,02848<br>1597 | 0,00091<br>8235 | 0,002410<br>403 |

|          |                 |                              |                                         |  |  |             |             |             |             |             |
|----------|-----------------|------------------------------|-----------------------------------------|--|--|-------------|-------------|-------------|-------------|-------------|
| Bacteria | Proteobacteria  | Gammaproteobacteria          | Legionellales                           |  |  | 0           | 1,30262E-06 | 1,69859E-06 | 0,000110221 | 2,55251E-06 |
| Bacteria | Proteobacteria  | Gammaproteobacteria          | Oceanospirillales                       |  |  | 0           | 0           | 0           | 0           | 3,02225E-06 |
| Bacteria | Proteobacteria  | Gammaproteobacteria          | Orbales                                 |  |  | 0           | 0           | 1,91197E-06 | 0           | 0           |
| Bacteria | Proteobacteria  | Gammaproteobacteria          | Pasteurellales                          |  |  | 6,62708E-05 | 8,77891E-06 | 0,00024449  | 3,02386E-05 | 0,001064204 |
| Bacteria | Proteobacteria  | Gammaproteobacteria          | Vibrionales                             |  |  | 0           | 0           | 0           | 0           | 1,50014E-06 |
| Bacteria | Proteobacteria  | Gammaproteobacteria          | Xanthomonadales                         |  |  | 2,1233E-06  | 4,37137E-06 | 1,16091E-05 | 1,40088E-05 | 3,22392E-05 |
| Bacteria | SRI             | SRI_genera_incertainae_sedis | SRI_genera_incertainae_sedis            |  |  | 0           | 0           | 1,41073E-05 | 0,0004425   | 0           |
| Bacteria | Spirochaetes    | Spirochaetia                 | Spirochaetales                          |  |  | 8,21604E-06 | 0,024746571 | 0,030418188 | 0,026490124 | 0,041474055 |
| Bacteria | Synergistetes   | Synergistia                  | Synergistales                           |  |  | 6,8467E-07  | 0,000992028 | 4,27386E-05 | 0,000601401 | 0,001769282 |
| Bacteria | Tenericutes     | Mollicutes                   | Acholeplasmatales                       |  |  | 0,000522859 | 6,47658E-06 | 6,06724E-05 | 0,000126821 | 0,00804251  |
| Bacteria | Tenericutes     | Mollicutes                   | Anaeroplasmatales                       |  |  | 0,002411235 | 0,001194081 | 0,00091422  | 0,002240633 | 0,01191534  |
| Bacteria | Tenericutes     | Mollicutes                   | Haloplasmatales                         |  |  | 0           | 0           | 0           | 0           | 1,25726E-06 |
| Bacteria | Tenericutes     | Mollicutes                   | Mycoplasmatales                         |  |  | 7,38594E-07 | 0           | 6,63663E-05 | 7,30395E-05 | 0,000460551 |
| Bacteria | Verrucomicrobia | Opitutae                     | Opitiales                               |  |  | 1,15613E-06 | 0           | 5,78172E-07 | 0           | 1,00009E-06 |
| Bacteria | Verrucomicrobia | Opitutae                     | Puniceococcales                         |  |  | 6,67592E-05 | 0,000618422 | 0,000357573 | 2,21597E-05 | 0,000389671 |
| Bacteria | Verrucomicrobia | Spartobacteria               | Spartobacteria_genera_incertainae_sedis |  |  | 2,31227E-06 | 0           | 2,32559E-06 | 4,0574E-06  | 1,32809E-05 |
| Bacteria | Verrucomicrobia | Spartobacteria               | Xiphinematobacter                       |  |  | 0           | 0           | 6,18624E-07 | 0           | 0           |
| Bacteria | Verrucomicrobia | Subdivision3                 | Subdivision3_genera_incertainae_sedis   |  |  | 0           | 1,14513E-06 | 7,81412E-07 | 0           | 0           |
| Bacteria | Verrucomicrobia | Subdivision5                 | Subdivision5_genera_incertainae_sedis   |  |  | 1,38952E-06 | 0,006002729 | 0,004541873 | 0,020351255 | 0,001349141 |
| Bacteria | Verrucomicrobia | Verrucomicrobiae             | Verrucomicrobiales                      |  |  | 0,001670242 | 0,002463152 | 0,010415019 | 1,51586E-05 | 9,9488E-06  |

|                 |                                 |                                    |                                    |  |  |             |             |             |             |             |
|-----------------|---------------------------------|------------------------------------|------------------------------------|--|--|-------------|-------------|-------------|-------------|-------------|
| <i>Bacteria</i> | <i>candidate division WPS-1</i> | <i>WPS-1_genera_incertae_sedis</i> | <i>WPS-1_genera_incertae_sedis</i> |  |  | 1,08774E-06 | 0           | 3,5999E-06  | 0           | 0           |
| <i>Bacteria</i> | <i>candidate division WPS-2</i> | <i>WPS-2_genera_incertae_sedis</i> | <i>WPS-2_genera_incertae_sedis</i> |  |  | 0           | 0           | 3,52987E-07 | 0           | 0           |
| <i>Archaea</i>  | <i>Crenarchaeota</i>            | <i>Thermoprotei</i>                |                                    |  |  | 0           | 0           | 0           | 4,70618E-07 | 0           |
| <i>Archaea</i>  | <i>Euryarchaeota</i>            | <i>Methanobacteria</i>             |                                    |  |  | 0           | 0,001810226 | 0,005324131 | 0,000219484 | 1,30821E-05 |
| <i>Archaea</i>  | <i>Euryarchaeota</i>            | <i>Thermoplasmata</i>              |                                    |  |  | 0           | 0,000532381 | 3,2605E-05  | 9,04343E-05 | 0,000323092 |
| <i>Bacteria</i> | <i>Acidobacteria</i>            | <i>Acidobacteria_Gp1</i>           |                                    |  |  | 0           | 0           | 1,59532E-06 | 2,3544E-06  | 0           |
| <i>Bacteria</i> | <i>Acidobacteria</i>            | <i>Acidobacteria_Gp16</i>          |                                    |  |  | 0           | 0           | 1,10742E-06 | 0           | 8,635E-07   |
| <i>Bacteria</i> | <i>Acidobacteria</i>            | <i>Acidobacteria_Gp2</i>           |                                    |  |  | 0           | 0           | 8,7086E-07  | 0           | 1,55733E-05 |
| <i>Bacteria</i> | <i>Acidobacteria</i>            | <i>Acidobacteria_Gp3</i>           |                                    |  |  | 0           | 0           | 9,698E-07   | 5,56336E-07 | 0           |
| <i>Bacteria</i> | <i>Acidobacteria</i>            | <i>Acidobacteria_Gp4</i>           |                                    |  |  | 6,51926E-06 | 0           | 3,05562E-06 | 1,49575E-06 | 0           |
| <i>Bacteria</i> | <i>Acidobacteria</i>            | <i>Acidobacteria_Gp6</i>           |                                    |  |  | 2,31227E-06 | 0           | 5,80644E-06 | 0           | 0           |
| <i>Bacteria</i> | <i>Acidobacteria</i>            | <i>Acidobacteria_Gp7</i>           |                                    |  |  | 0           | 0           | 7,53505E-07 | 4,50315E-07 | 0           |
| <i>Bacteria</i> | <i>Actinobacteria</i>           | <i>Actinobacteria</i>              |                                    |  |  | 0,000870523 | 0,0012541   | 0,007633133 | 0,006409349 | 0,001838735 |
| <i>Bacteria</i> | <i>Actinobacteria</i>           | <i>Thermoleophilia</i>             |                                    |  |  | 0           | 0           | 1,36693E-06 | 0           | 2,15875E-06 |
| <i>Bacteria</i> | <i>Armatimonadetes</i>          | <i>Armatimonadetes_gp4</i>         |                                    |  |  | 0           | 0           | 3,85448E-07 | 0           | 0           |
| <i>Bacteria</i> | <i>Armatimonadetes</i>          | <i>Armatimonadetes_gp5</i>         |                                    |  |  | 0           | 0           | 4,56803E-07 | 2,16547E-07 | 0           |
| <i>Bacteria</i> | <i>Armatimonadetes</i>          | <i>Armatimonadia</i>               |                                    |  |  | 0           | 0           | 5,2948E-07  | 0           | 0           |
| <i>Bacteria</i> | <i>Armatimonadetes</i>          | <i>Chthonomonadetes</i>            |                                    |  |  | 0           | 0           | 2,8157E-07  | 0           | 0           |
| <i>Bacteria</i> | <i>BRC1</i>                     | <i>BRC1_genera_incertae_sedis</i>  |                                    |  |  | 0           | 0           | 0           | 2,16547E-07 | 0           |

|                 |                                    |                                                  |  |  |  |             |             |             |             |             |
|-----------------|------------------------------------|--------------------------------------------------|--|--|--|-------------|-------------|-------------|-------------|-------------|
| <i>Bacteria</i> | <i>Bacteroidetes</i>               | <i>Bacteroidetes" _incertae _sedis</i>           |  |  |  | 2,31227E-06 | 1,4956E-05  | 5,65226E-06 | 1,47076E-05 | 4,3175E-07  |
| <i>Bacteria</i> | <i>Bacteroidetes</i>               | <i>Bacteroidia</i>                               |  |  |  | 0,290746039 | 0,33988478  | 0,280910854 | 0,288149096 | 0,229883752 |
| <i>Bacteria</i> | <i>Bacteroidetes</i>               | <i>Cytophagia</i>                                |  |  |  | 2,52547E-06 | 1,26195E-05 | 1,19124E-05 | 5,98303E-05 | 2,41927E-06 |
| <i>Bacteria</i> | <i>Bacteroidetes</i>               | <i>Flavobacteriia</i>                            |  |  |  | 1,38899E-05 | 0,00920804  | 0,011573752 | 0,017043473 | 0,007180883 |
| <i>Bacteria</i> | <i>Bacteroidetes</i>               | <i>Sphingobacteriia</i>                          |  |  |  | 1,38667E-05 | 0,015260894 | 0,004552561 | 0,026804329 | 5,0705E-05  |
| <i>Bacteria</i> | <i>Candidatus Saccharibacteria</i> | <i>Saccharibacteria _genera _incertae _sedis</i> |  |  |  | 1,99122E-06 | 7,69525E-05 | 0,00053016  | 0,002204092 | 0,000102494 |
| <i>Bacteria</i> | <i>Chlamydiae</i>                  | <i>Chlamydiia</i>                                |  |  |  | 0           | 0,00069837  | 2,98652E-06 | 0,000768975 | 1,25726E-06 |
| <i>Bacteria</i> | <i>Chloroflexi</i>                 | <i>Anaerolineae</i>                              |  |  |  | 0           | 0           | 1,76493E-07 | 0,000191085 | 4,38417E-06 |
| <i>Bacteria</i> | <i>Chloroflexi</i>                 | <i>Caldilineae</i>                               |  |  |  | 5,78067E-06 | 0           | 0           | 0           | 0           |
| <i>Bacteria</i> | <i>Chloroflexi</i>                 | <i>Chloroflexia</i>                              |  |  |  | 0           | 0           | 3,52987E-07 | 0           | 4,3175E-07  |
| <i>Bacteria</i> | <i>Chloroflexi</i>                 | <i>Thermomicrobia</i>                            |  |  |  | 3,4684E-06  | 0           | 1,36342E-05 | 2,16547E-07 | 0           |
| <i>Bacteria</i> | <i>Cyanobacteria/ Chloroplast</i>  | <i>Chloroplast</i>                               |  |  |  | 3,94789E-06 | 1,03565E-05 | 0,001322938 | 3,93451E-05 | 3,27429E-05 |
| <i>Bacteria</i> | <i>Cyanobacteria/ Chloroplast</i>  | <i>Cyanobacteria</i>                             |  |  |  | 0           | 0           | 1,56282E-07 | 1,25387E-06 | 0           |
| <i>Bacteria</i> | <i>Deferribacteres</i>             | <i>Deferribacteres</i>                           |  |  |  | 0           | 5,59831E-05 | 5,09107E-05 | 0,000582846 | 0           |
| <i>Bacteria</i> | <i>Deinococcus- Thermus</i>        | <i>Deinococci</i>                                |  |  |  | 3,4684E-06  | 0           | 1,80215E-07 | 7,60389E-07 | 3,02225E-06 |
| <i>Bacteria</i> | <i>Elusimicrobia</i>               | <i>Elusimicrobia</i>                             |  |  |  | 0,006730554 | 0,001870505 | 0,000328789 | 0           | 0,008924486 |
| <i>Bacteria</i> | <i>Fibrobacteres</i>               | <i>Fibrobacteria</i>                             |  |  |  | 0           | 0,000746676 | 0,00226435  | 0,00128398  | 0,000893402 |
| <i>Bacteria</i> | <i>Firmicutes</i>                  | <i>Bacilli</i>                                   |  |  |  | 0,000950269 | 0,022535178 | 0,032754053 | 0,008013824 | 0,007518291 |
| <i>Bacteria</i> | <i>Firmicutes</i>                  | <i>Clostridia</i>                                |  |  |  | 0,630208217 | 0,426567052 | 0,471265358 | 0,427587309 | 0,545333861 |



|          |                  |                                         |  |  |  |                 |                 |                 |                 |                 |
|----------|------------------|-----------------------------------------|--|--|--|-----------------|-----------------|-----------------|-----------------|-----------------|
| Bacteria | Firmicutes       | Erysipelotrichia                        |  |  |  | 0,01248<br>2446 | 0,0059301<br>06 | 0,01118<br>7702 | 0,02108<br>2713 | 0,015911<br>62  |
| Bacteria | Firmicutes       | Negativicutes                           |  |  |  | 0,01501<br>4763 | 0,0430811<br>54 | 0,03162<br>7344 | 0,05873<br>4824 | 0,007685<br>603 |
| Bacteria | Fusobacteria     | Fusobacteriia                           |  |  |  | 1,7675E<br>-06  | 6,99645E-<br>06 | 0,00051<br>0223 | 6,70056<br>E-05 | 5,53898E<br>-05 |
| Bacteria | Gemmatimonadetes | Gemmatimonadetes                        |  |  |  | 0               | 0               | 6,20688<br>E-06 | 2,12386<br>E-06 | 8,22341E<br>-07 |
| Bacteria | Lentisphaerae    | Lentisphaeria                           |  |  |  | 4,46225<br>E-05 | 0,0002723<br>91 | 7,13217<br>E-05 | 5,70807<br>E-06 | 9,84705E<br>-05 |
| Bacteria | Lentisphaerae    | Oligosphaeria                           |  |  |  | 0               | 5,69725E-<br>06 | 2,11151<br>E-06 | 2,77339<br>E-06 | 0               |
| Bacteria | Nitrospirae      | Nitrospira                              |  |  |  | 0               | 0               | 2,1459E<br>-06  | 0               | 0               |
| Bacteria | Parcubacteria    | Parcubacteria_genera_<br>incertae_sedis |  |  |  | 0               | 0               | 6,24915<br>E-07 | 4,02996<br>E-07 | 5,61184E<br>-06 |
| Bacteria | Planctomycetes   | Planctomycetia                          |  |  |  | 4,62453<br>E-06 | 0,0073235<br>85 | 0,01076<br>704  | 0,00928<br>5983 | 0,001085<br>587 |
| Bacteria | Proteobacteria   | Alphaproteobacteria                     |  |  |  | 0,00145<br>4969 | 0,0038716<br>28 | 0,00140<br>705  | 0,00061<br>7295 | 0,029638<br>273 |
| Bacteria | Proteobacteria   | Betaproteobacteria                      |  |  |  | 0,00433<br>4266 | 0,0043736<br>73 | 0,00188<br>3433 | 0,00182<br>3811 | 0,008281<br>712 |
| Bacteria | Proteobacteria   | Deltaproteobacteria                     |  |  |  | 0,01718<br>4354 | 0,0145978<br>26 | 0,01154<br>8267 | 0,01209<br>2951 | 0,024241<br>712 |
| Bacteria | Proteobacteria   | Epsilonproteobacteria                   |  |  |  | 1,4952E<br>-05  | 0,0041478<br>34 | 0,00075<br>2878 | 0,00883<br>2211 | 5,87048E<br>-05 |
| Bacteria | Proteobacteria   | Gammaproteobacteria                     |  |  |  | 0,00101<br>9516 | 0,0042613<br>77 | 0,03285<br>0724 | 0,00830<br>72   | 0,007059<br>411 |
| Bacteria | SR1              | SR1_genera_incertae_s<br>edis           |  |  |  | 0               | 0               | 1,41073<br>E-05 | 0,00044<br>25   | 0               |
| Bacteria | Spirochaetes     | Spirochaetia                            |  |  |  | 8,21604<br>E-06 | 0,0247465<br>71 | 0,03041<br>8188 | 0,02649<br>0124 | 0,041474<br>055 |
| Bacteria | Synergistetes    | Synergistia                             |  |  |  | 6,8467E<br>-07  | 0,0009920<br>28 | 4,27386<br>E-05 | 0,00060<br>1401 | 0,001769<br>282 |
| Bacteria | Tenericutes      | Mollicutes                              |  |  |  | 0,00373<br>4463 | 0,0012908<br>28 | 0,00118<br>606  | 0,00267<br>9968 | 0,022091<br>917 |
| Bacteria | Verrucomicrobia  | Opitutae                                |  |  |  | 6,79153<br>E-05 | 0,0006184<br>22 | 0,00036<br>0838 | 2,26304<br>E-05 | 0,000566<br>955 |
| Bacteria | Verrucomicrobia  | Spartobacteria                          |  |  |  | 2,31227<br>E-06 | 0               | 3,56284<br>E-06 | 4,0574E<br>-06  | 1,32809E<br>-05 |

|                 |                                    |                                    |  |  |  |             |             |             |             |             |
|-----------------|------------------------------------|------------------------------------|--|--|--|-------------|-------------|-------------|-------------|-------------|
| <i>Bacteria</i> | <i>Verrucomicrobia</i>             | <i>Subdivision3</i>                |  |  |  | 0           | 1,14513E-06 | 7,81412E-07 | 0           | 0           |
| <i>Bacteria</i> | <i>Verrucomicrobia</i>             | <i>Subdivision5</i>                |  |  |  | 1,38952E-06 | 0,006002729 | 0,004541873 | 0,020351255 | 0,001349141 |
| <i>Bacteria</i> | <i>Verrucomicrobia</i>             | <i>Verrucomicrobiae</i>            |  |  |  | 0,001670242 | 0,002463152 | 0,010415019 | 1,51586E-05 | 9,9488E-06  |
| <i>Bacteria</i> | <i>candidate division WPS-1</i>    | <i>WPS-1_genera_incertae_sedis</i> |  |  |  | 1,08774E-06 | 0           | 3,5999E-06  | 0           | 0           |
| <i>Bacteria</i> | <i>candidate division WPS-2</i>    | <i>WPS-2_genera_incertae_sedis</i> |  |  |  | 0           | 0           | 3,52987E-07 | 0           | 0           |
| <i>Archaea</i>  | <i>Crenarchaeota</i>               |                                    |  |  |  | 0           | 0           | 0           | 4,70618E-07 | 0           |
| <i>Archaea</i>  | <i>Euryarchaeota</i>               |                                    |  |  |  | 2,54565E-06 | 0,002394293 | 0,005357289 | 0,000365841 | 0,000337428 |
| <i>Bacteria</i> | <i>Acidobacteria</i>               |                                    |  |  |  | 8,83153E-06 | 0           | 1,4159E-05  | 4,8568E-06  | 1,64368E-05 |
| <i>Bacteria</i> | <i>Actinobacteria</i>              |                                    |  |  |  | 0,000870523 | 0,0012541   | 0,00763532  | 0,006409565 | 0,001840894 |
| <i>Bacteria</i> | <i>Armatimonadetes</i>             |                                    |  |  |  | 0           | 0           | 1,6533E-06  | 2,16547E-07 | 0           |
| <i>Bacteria</i> | <i>BRC1</i>                        |                                    |  |  |  | 0           | 0           | 0           | 2,16547E-07 | 0           |
| <i>Bacteria</i> | <i>Bacteroidetes</i>               |                                    |  |  |  | 0,291083445 | 0,401004064 | 0,311448285 | 0,368506551 | 0,239693449 |
| <i>Bacteria</i> | <i>Candidatus Saccharibacteria</i> |                                    |  |  |  | 1,99122E-06 | 7,69525E-05 | 0,00053016  | 0,002204092 | 0,000102494 |
| <i>Bacteria</i> | <i>Chlamydiae</i>                  |                                    |  |  |  | 0           | 0,00069837  | 2,98652E-06 | 0,000768975 | 1,25726E-06 |
| <i>Bacteria</i> | <i>Chloroflexi</i>                 |                                    |  |  |  | 1,15613E-05 | 0           | 1,43402E-05 | 0,000191922 | 7,74953E-06 |
| <i>Bacteria</i> | <i>Cyanobacteria/ Chloroplast</i>  |                                    |  |  |  | 3,94789E-06 | 1,03565E-05 | 0,001323095 | 4,05989E-05 | 3,27429E-05 |
| <i>Bacteria</i> | <i>Deferribacteres</i>             |                                    |  |  |  | 0           | 5,59831E-05 | 5,09107E-05 | 0,000582846 | 0           |
| <i>Bacteria</i> | <i>Deinococcus-Thermus</i>         |                                    |  |  |  | 3,4684E-06  | 0           | 1,80215E-07 | 7,60389E-07 | 3,02225E-06 |

|                 |                                 |  |  |  |  |                 |                 |                 |                 |                 |
|-----------------|---------------------------------|--|--|--|--|-----------------|-----------------|-----------------|-----------------|-----------------|
| <i>Bacteria</i> | <i>Elusimicrobia</i>            |  |  |  |  | 0,00673<br>0554 | 0,0018705<br>05 | 0,00032<br>8789 | 0               | 0,008924<br>486 |
| <i>Bacteria</i> | <i>Fibrobacteres</i>            |  |  |  |  | 0               | 0,0007466<br>76 | 0,00226<br>435  | 0,00128<br>398  | 0,000893<br>402 |
| <i>Bacteria</i> | <i>Firmicutes</i>               |  |  |  |  | 0,66890<br>7321 | 0,5059833<br>91 | 0,55612<br>6004 | 0,51897<br>0629 | 0,599803<br>485 |
| <i>Bacteria</i> | <i>Fusobacteria</i>             |  |  |  |  | 1,7675E<br>-06  | 6,99645E-<br>06 | 0,00051<br>0223 | 6,70056<br>E-05 | 5,53898E<br>-05 |
| <i>Bacteria</i> | <i>Gemmatimonadetes</i>         |  |  |  |  | 0               | 0               | 6,20688<br>E-06 | 2,12386<br>E-06 | 8,22341E<br>-07 |
| <i>Bacteria</i> | <i>Lentisphaerae</i>            |  |  |  |  | 4,78326<br>E-05 | 0,0004671<br>8  | 0,00010<br>1259 | 0,00010<br>2985 | 0,000146<br>835 |
| <i>Bacteria</i> | <i>Nitrospirae</i>              |  |  |  |  | 0               | 0               | 2,1459E<br>-06  | 0               | 0               |
| <i>Bacteria</i> | <i>Parcubacteria</i>            |  |  |  |  | 0               | 0               | 6,24915<br>E-07 | 4,02996<br>E-07 | 5,61184E<br>-06 |
| <i>Bacteria</i> | <i>Planctomycetes</i>           |  |  |  |  | 4,62453<br>E-06 | 0,0073235<br>85 | 0,01076<br>8298 | 0,00928<br>5983 | 0,001085<br>587 |
| <i>Bacteria</i> | <i>Proteobacteria</i>           |  |  |  |  | 0,02402<br>0771 | 0,0313612<br>22 | 0,04860<br>7827 | 0,03183<br>7887 | 0,069344<br>776 |
| <i>Bacteria</i> | <i>SR1</i>                      |  |  |  |  | 0               | 0               | 1,41073<br>E-05 | 0,00044<br>25   | 0               |
| <i>Bacteria</i> | <i>Spirochaetes</i>             |  |  |  |  | 8,21604<br>E-06 | 0,0247465<br>71 | 0,03041<br>8188 | 0,02649<br>0124 | 0,041474<br>055 |
| <i>Bacteria</i> | <i>Synergistetes</i>            |  |  |  |  | 6,8467E<br>-07  | 0,0009920<br>28 | 4,27386<br>E-05 | 0,00060<br>1401 | 0,001769<br>282 |
| <i>Bacteria</i> | <i>Tenericutes</i>              |  |  |  |  | 0,00373<br>4463 | 0,0012908<br>28 | 0,00118<br>606  | 0,00267<br>9968 | 0,022091<br>917 |
| <i>Bacteria</i> | <i>Verrucomicrobia</i>          |  |  |  |  | 0,00174<br>1859 | 0,0090940<br>64 | 0,01535<br>3211 | 0,02046<br>6149 | 0,001939<br>325 |
| <i>Bacteria</i> | <i>candidate division WPS-1</i> |  |  |  |  | 1,08774<br>E-06 | 0               | 3,5999E<br>-06  | 0               | 0               |
| <i>Bacteria</i> | <i>candidate division WPS-2</i> |  |  |  |  | 0               | 0               | 3,52987<br>E-07 | 0               | 0               |

**Supplementary table S6.** KEGG pathways predicted using PiCRUST to be significantly changed between different groups analyzed. Statistical tests were done in STAMP.

| L1              | L2                       | L3                        | P values          | P values (corrected) | Warthogs           |                   |                    |                   | Pigs               |                   |                    |                   |                    |                   |
|-----------------|--------------------------|---------------------------|-------------------|----------------------|--------------------|-------------------|--------------------|-------------------|--------------------|-------------------|--------------------|-------------------|--------------------|-------------------|
|                 |                          |                           |                   |                      | AFR                |                   | SPA                |                   | COM                |                   | AFR                |                   | SPF                |                   |
|                 |                          |                           |                   |                      | Mean rel. freq (%) | Std. dev (%)      | Mean rel. freq (%) | Std. dev (%)      | Mean rel. freq (%) | Std. dev (%)      | Mean rel. freq (%) | Std. dev (%)      | Mean rel. freq (%) | Std. dev (%)      |
| CELL CATABOLISM | Transport and Catabolism | Endocytosis               | 4.09781082157e-07 | 0.000123344105729    | 0.000342789461967  | 0.000523651413533 | 6.04685955554e-06  | 2.18777049229e-06 | 6.51869572722e-05  | 0.000147709537854 | 4.66858713314e-06  | 9.98578150365e-06 | 1.91291688442e-07  | 6.04917432935e-07 |
|                 | Cell Growth and Death    | Cell cycle                | 9.61485971729e-07 | 0.00028940727749     | 2.22273986045e-05  | 3.22010283245e-05 | 2.23500258085e-05  | 1.37561417117e-05 | 0.00018536723879   | 0.000225305045482 | 0.000517703042453  | 0.000544590600554 | 0.0                | 0.0               |
|                 | Transport and Catabolism | Phagosome                 | 9.61485971729e-07 | 0.00028940727749     | 2.22273986045e-05  | 3.22010283245e-05 | 2.23500258085e-05  | 1.37561417117e-05 | 0.00018536723879   | 0.000225305045482 | 0.000517703042453  | 0.000544598539299 | 0.0                | 0.0               |
| PROCESSES       | Cell Growth and Death    | Meiosis - yeast           | 5.16394942911e-05 | 0.0155434877816      | 0.0065393545565    | 0.00212902614428  | 0.00934182286674   | 0.00272145561536  | 0.0048612292952    | 0.00157432936671  | 0.00694170701491   | 0.00377924513005  | 0.00185424875086   | 0.0019699332037   |
|                 | Cell Motility            | Cytoskeleton proteins     | 5.19452485522e-05 | 0.0156355198142      | 0.386854868843     | 0.0204445587024   | 0.3942697703       | 0.0101090862044   | 0.379892140406     | 0.0183170541873   | 0.365663928783     | 0.026101486572    | 0.415661994219     | 0.0116650795632   |
|                 | Cell Growth and Death    | Apoptosis                 | 0.000138179726666 | 0.0415920977265      | 0.000666903462801  | 0.000974200541604 | 0.00155965780573   | 0.000786179263304 | 0.000763197903572  | 0.000497984541407 | 0.000722737959361  | 0.00210674299203  | 0.00160092740152   | 0.000968976639336 |
| ENVIRONMENT     | Signal Transduction      | mTOR signaling pathway    | 9.61485971729e-07 | 0.00028940727749     | 2.22273986045e-05  | 3.22010283245e-05 | 2.23500258085e-05  | 1.37561417117e-05 | 0.00018536723879   | 0.000225305045482 | 0.000517703042453  | 0.000544590600554 | 0.0                | 0.0               |
|                 | Signal Transduction      | Calcium signaling pathway | 1.5373760758e-06  | 0.000462750198815    | 6.6479833139e-06   | 3.85146764023e-06 | 3.60123132175e-06  | 2.3001698728e-06  | 8.12669355932e-07  | 1.24610254997e-06 | 0.000123055167355  | 0.000215798793605 | 3.17083042996e-07  | 1.00270462329e-06 |
|                 | Translation              | mRNA surveillance pathway | 1.5063661551e-06  | 0.000453416212685    | 4.49101491967e-05  | 6.44436380551e-05 | 4.48706180361e-05  | 2.78067220451e-05 | 0.00037073447758   | 0.000450610090964 | 0.00103887376991   | 0.00108968600916  | 5.73875065325e-07  | 1.8147522988e-06  |

|                                                                         |                        |                                           |                       |                       |                       |                       |                       |                       |                       |                       |                       |                       |                       |                       |
|-------------------------------------------------------------------------|------------------------|-------------------------------------------|-----------------------|-----------------------|-----------------------|-----------------------|-----------------------|-----------------------|-----------------------|-----------------------|-----------------------|-----------------------|-----------------------|-----------------------|
| T<br>A<br>L<br><br>I<br>N<br>F<br>O.<br><br>P<br>R<br>O<br>C<br>E<br>S. | Transcription          | Basal transcription factors               | 8.65339<br>616404e-06 | 0.0026046<br>7224538  | 0.002164<br>37483679  | 0.001082<br>39629429  | 0.002758<br>5577531   | 0.000910<br>552459223 | 0.001846<br>90604077  | 0.000685<br>147240267 | 0.004279<br>36375103  | 0.002957<br>62300631  | 0.000272<br>619302742 | 0.000135<br>553271426 |
|                                                                         | Translation            | Aminoacyl-tRNA biosynthesis               | 5.65171<br>93613e-05  | 0.0170116<br>752775   | 1.227678<br>71563     | 0.030524<br>7168651   | 1.299477<br>52261     | 0.023745<br>6575655   | 1.276258<br>21222     | 0.029143<br>3353907   | 1.218845<br>9441      | 0.048772<br>6058102   | 1.279408<br>61399     | 0.024073<br>8426979   |
|                                                                         | Replication and Repair | Mismatch repair                           | 9.08257<br>872495e-05 | 0.0273385<br>619621   | 0.848769<br>211142    | 0.027691<br>4553038   | 0.891645<br>658913    | 0.024528<br>4061325   | 0.883446<br>989728    | 0.031503<br>635406    | 0.847570<br>557358    | 0.033049<br>2250846   | 0.896031<br>377282    | 0.011406<br>3311112   |
|                                                                         | Replication and Repair | DNA replication                           | 0.00010<br>7524104324 | 0.0323647<br>554015   | 0.668660<br>814322    | 0.024869<br>1897252   | 0.710302<br>756677    | 0.024283<br>2269427   | 0.707569<br>520396    | 0.034265<br>9834255   | 0.671966<br>973623    | 0.028850<br>3936423   | 0.710352<br>244698    | 0.010162<br>0072232   |
| H<br>U<br>M<br>A<br>N<br><br>D<br>I<br>S<br>E<br>A<br>S<br>E<br>S       | Infectious Diseases    | Vibrio cholerae infection                 | 8.79348<br>623188e-07 | 0.0002646<br>83935579 | 2.352901<br>29049e-05 | 3.239669<br>42504e-05 | 2.632427<br>9407e-05  | 1.568380<br>62678e-05 | 0.000186<br>567075269 | 0.000225<br>434585571 | 0.000522<br>716705692 | 0.000541<br>544374191 | 0.0                   | 0.0                   |
|                                                                         | Infectious Diseases    | Measles                                   | 9.61485<br>971729e-07 | 0.0002894<br>0727749  | 2.222739<br>86045e-05 | 3.220102<br>83245e-05 | 2.235002<br>58085e-05 | 1.375614<br>17117e-05 | 0.000185<br>36723879  | 0.000225<br>305045482 | 0.000517<br>703042453 | 0.000544<br>590600554 | 0.0                   | 0.0                   |
|                                                                         | Infectious Diseases    | Hepatitis C                               | 9.61485<br>971729e-07 | 0.0002894<br>0727749  | 2.222739<br>86045e-05 | 3.220102<br>83245e-05 | 2.235002<br>58085e-05 | 1.375614<br>17117e-05 | 0.000185<br>36723879  | 0.000225<br>305045482 | 0.000517<br>703042453 | 0.000544<br>590600554 | 0.0                   | 0.0                   |
|                                                                         | Infectious Diseases    | Bacterial invasion of epithelial cells    | 9.83252<br>094004e-07 | 0.0002959<br>58880295 | 0.001122<br>51641394  | 0.000811<br>90792401  | 0.000213<br>808110815 | 8.754341<br>55005e-05 | 0.000153<br>269525336 | 8.612098<br>92503e-05 | 0.001215<br>20392184  | 0.001244<br>78120419  | 2.871902<br>29117e-05 | 4.328229<br>7284e-05  |
|                                                                         | Infectious Diseases    | Chagas disease (American trypanosomiasis) | 1.64024<br>166587e-06 | 0.0004937<br>12741428 | 0.001867<br>31347514  | 0.001641<br>99777596  | 0.000170<br>360218407 | 0.000100<br>718922444 | 2.774247<br>75429e-05 | 2.419844<br>21175e-05 | 0.001212<br>65556663  | 0.001360<br>51011194  | 0.000179<br>262778424 | 0.000140<br>63524857  |
|                                                                         | Infectious Diseases    | Pathogenic Escherichia coli infection     | 2.22247<br>661777e-06 | 0.0006689<br>6546195  | 5.220070<br>92926e-07 | 1.808285<br>61372e-06 | 8.327092<br>59379e-07 | 1.665418<br>51876e-06 | 0.0                   | 0.0                   | 1.708066<br>52366e-05 | 2.064177<br>49538e-05 | 0.0                   | 0.0                   |



|                                             |                                         |                   |                  |                   |                   |                   |                   |                   |                   |                   |                   |                   |                   |
|---------------------------------------------|-----------------------------------------|-------------------|------------------|-------------------|-------------------|-------------------|-------------------|-------------------|-------------------|-------------------|-------------------|-------------------|-------------------|
| Biosynthesis of Other Secondary Metabolites | Betalain biosynthesis                   | 1.3107899566e-05  | 0.00394547776937 | 2.77682710345e-05 | 2.15021453025e-05 | 0.000108162938375 | 7.36141428172e-05 | 1.21804090754e-05 | 1.03918459395e-05 | 4.7851132443e-06  | 3.17264567354e-06 | 1.41920099257e-05 | 1.20148447353e-05 |
| Metabolism of Cofactors and Vitamins        | Thiamine metabolism                     | 1.77679119572e-05 | 0.00534814149912 | 0.520059981429    | 0.0163509370157   | 0.502639997791    | 0.00779542099725  | 0.497573596091    | 0.0190072808866   | 0.492587738997    | 0.0195382498992   | 0.535738470061    | 0.0125150897152   |
| Glycan Biosynthesis and Metabolism          | Various types of N-glycan biosynthesis  | 2.2125229313e-05  | 0.0066596940232  | 0.000847397851202 | 0.00101659406246  | 0.000138427116447 | 6.6988840598e-05  | 0.000604296738004 | 0.000347865632443 | 0.000708101730544 | 0.000562215577825 | 4.49180164645e-05 | 6.19569354132e-05 |
| Carbohydrate Metabolism                     | Ascorbate and aldarate metabolism       | 3.21036509008e-05 | 0.00966319892113 | 0.0938887942902   | 0.0149357203976   | 0.0875686048813   | 0.00720927471785  | 0.0967317688375   | 0.00960564748208  | 0.107099999872    | 0.00816983001043  | 0.0789469670585   | 0.00945416102925  |
| Enzyme Families                             | Cytochrome P450                         | 3.2334590559e-05  | 0.00973271175826 | 8.2317664058e-07  | 1.44280537811e-06 | 5.93968830523e-06 | 3.95614384366e-06 | 0.0               | 0.0               | 4.42330464191e-06 | 6.74766840181e-06 | 8.89066033201e-07 | 2.22886935409e-06 |
| Amino Acid Metabolism                       | Tryptophan metabolism                   | 6.40129399534e-05 | 0.019267894926   | 0.158736409183    | 0.0445127395087   | 0.13748536757     | 0.00672017966174  | 0.138638300515    | 0.0222328508945   | 0.161902344292    | 0.0279926121283   | 0.116954098858    | 0.01215207806     |
| Xenobiotics Biodegradation and Metabolism   | Caprolactam degradation                 | 0.000111163581496 | 0.0334602380304  | 0.0267789543816   | 0.0189501408953   | 0.0166959249387   | 0.00318572994875  | 0.0178938966622   | 0.00715410173103  | 0.0283914104892   | 0.0112523050861   | 0.0119489092874   | 0.00487277962568  |
| Energy Metabolism                           | Carbon fixation pathways in prokaryotes | 0.000146803103163 | 0.044187734052   | 0.977241042032    | 0.0542353185094   | 1.03670178548     | 0.0383416680114   | 1.06532643057     | 0.0457424852137   | 1.01475518498     | 0.0298934180376   | 1.06909139864     | 0.0268037146514   |

|                                                                                   |                  |                                  |                   |                   |                   |                   |                   |                   |                   |                   |                   |                   |                   |                   |
|-----------------------------------------------------------------------------------|------------------|----------------------------------|-------------------|-------------------|-------------------|-------------------|-------------------|-------------------|-------------------|-------------------|-------------------|-------------------|-------------------|-------------------|
| O<br>R<br>G<br>A<br>N<br>I<br>S<br>M<br>A<br>L<br>S<br>Y<br>S<br>T<br>E<br>M<br>S | Immune System    | Fc gamma R-mediated phagocytosis | 4.09781082157e-07 | 0.000123344105729 | 0.000342789461967 | 0.000523651413533 | 6.04685955554e-06 | 2.18777049229e-06 | 6.51869572722e-05 | 0.000147709537854 | 4.66858713314e-06 | 9.98578150365e-06 | 1.91291688442e-07 | 6.04917432935e-07 |
|                                                                                   | Endocrine System | GnRH signaling pathway           | 4.09781082157e-07 | 0.000123344105729 | 0.000342789461967 | 0.000523651413533 | 6.04685955554e-06 | 2.18777049229e-06 | 6.51869572722e-05 | 0.000147709537854 | 4.66858713314e-06 | 9.98578150365e-06 | 1.91291688442e-07 | 6.04917432935e-07 |
|                                                                                   | Digestive System | Bile secretion                   | 4.64191398876e-07 | 0.000139721611062 | 0.000920887914386 | 0.000806030453882 | 0.00231139167065  | 0.0009707450345   | 0.000441791850539 | 0.000191964695549 | 0.00152896770611  | 0.001147629675    | 1.98712483789e-06 | 3.48784587731e-06 |
|                                                                                   | Nervous System   | Glutamate synapse                | 1.45564846773e-06 | 0.000438150188786 | 0.0984749862613   | 0.00275767243797  | 0.104479002346    | 0.00470898883099  | 0.101341572865    | 0.00300343070117  | 0.0970547357937   | 0.0030590763592   | 0.108339812062    | 0.0020428690882   |
|                                                                                   | Endocrine System | Adipocytokine signaling pathway  | 3.70308047192e-05 | 0.0111462722205   | 0.0698923227173   | 0.00536551295609  | 0.0796454379488   | 0.00257528661938  | 0.0778338209433   | 0.0101125369081   | 0.0676475279967   | 0.00805251605304  | 0.0844790629791   | 0.00461817045052  |
|                                                                                   | Endocrine System | PPAR signaling pathway           | 0.000122022753208 | 0.0367288487156   | 0.108924955447    | 0.00995287393643  | 0.119899280353    | 0.00236974997165  | 0.113038325144    | 0.0070209516711   | 0.107197164684    | 0.0068511341699   | 0.122791903937    | 0.0058796060649   |
